# Supplementary material for: Mesenchymal Stromal Cell-Derived Small Extracellular Vesicles Modulate Apoptosis, TNF Alpha and Interferon Gamma Response Gene mRNA Expression in T Lymphocytes
Source: MDPI journal article supplement (doi:10.3390/ijms241813689), 2023-09-05
Supplement: s1 [file s1]

**Figure S2: Electron Microscopy**

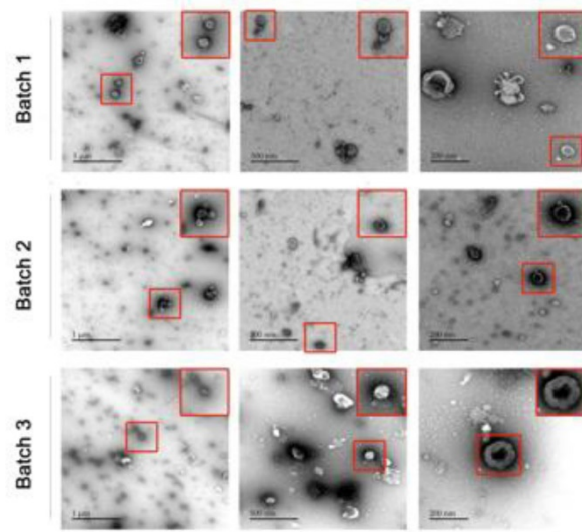

Samples were stained with Nanovan (previously vortexed for 3-5 min). Briefly, 5  $\mu$ l of samples were placed on formvar/carbon coated copper 200 mesh grids (EMS), mixed with 5  $\mu$ l NV (NANOVAN, Nanoprobes, NY, USA) for 5-10 sec, excess stain was blotted off and grids were dried. Grids were visualized with Jeol® JEM-1400 Plus transmission electron microscope (TEM, Jeol®, Tokyo, Japan), equipped with ORIUS SC600 CCD camera (Gatan®, Abingdon, UK), and Gatan Microscopy Suite program (DigitalMicrograph, Gatan®, UK).
