# Supplementary material for: Mesenchymal Stromal Cell-Derived Small Extracellular Vesicles Modulate Apoptosis, TNF Alpha and Interferon Gamma Response Gene mRNA Expression in T Lymphocytes
Source: MDPI journal article supplement (doi:10.3390/ijms241813689), 2023-09-05
Supplement: s1 [file s1]

**Table S6: Donor characteristics.** (a). MSC donors' characteristics. (b). Lymphocyte donors' characteristics.

a.

| <b>MSC Donor no.</b> | <b>Age</b> | <b>Gender</b> |
|----------------------|------------|---------------|
| <b>1</b>             | 53         | Male          |
| <b>2</b>             | 33         | Female        |
| <b>3</b>             | 23         | Male          |

b.

| <b>Lymphocyte Donor no.</b> | <b>Age</b> | <b>Gender</b> |
|-----------------------------|------------|---------------|
| <b>1</b>                    | 55         | Female        |
| <b>2</b>                    | 64         | Male          |
| <b>3</b>                    | 32         | Female        |
| <b>4</b>                    | 54         | Male          |
| <b>5</b>                    | 38         | Male          |
| <b>6</b>                    | 41         | Female        |
| <b>7</b>                    | 31         | Male          |
