# Supplementary material for: Mesenchymal Stromal Cell-Derived Small Extracellular Vesicles Modulate Apoptosis, TNF Alpha and Interferon Gamma Response Gene mRNA Expression in T Lymphocytes
Source: MDPI journal article supplement (doi:10.3390/ijms241813689), 2023-09-05
Supplement: s1 [file s1]

**FigureS1. MSC Characterization**

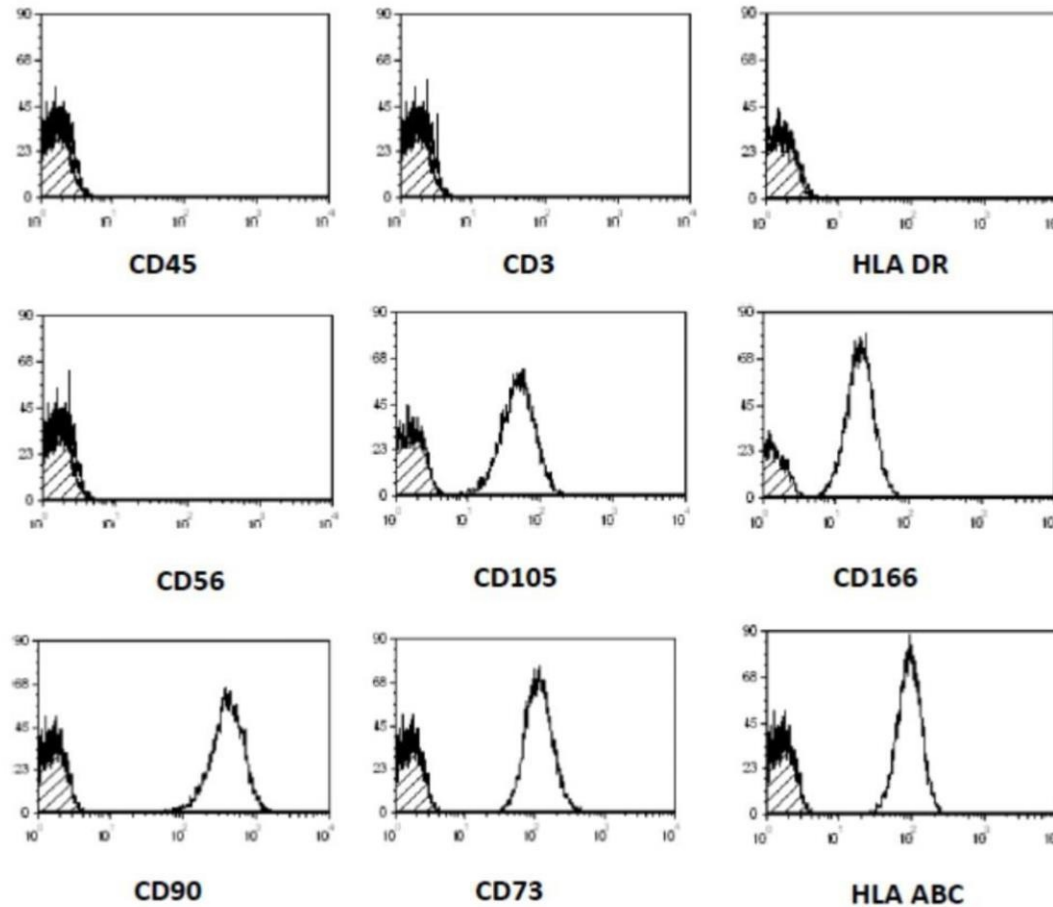

Cells' identity was confirmed by flow cytometry analysis (FACS) using established criteria with positive markers (anti CD73, CD166, CD105, HLA-ABC and CD90 antibodies) and negative markers (anti HLA-DR, CD56, CD3 and CD45 antibodies).
