# Supplementary material for: Mesenchymal Stromal Cell-Derived Small Extracellular Vesicles Modulate Apoptosis, TNF Alpha and Interferon Gamma Response Gene mRNA Expression in T Lymphocytes
Source: Int J Mol Sci. 2023 Sep 5;24(18):13689. doi: 10.3390/ijms241813689 (PMC10530670; doi:10.3390/ijms241813689)
Supplement: Supplementary file 1 [file ijms-24-13689-s001.zip]

Archive with 8 entries (8 files):
- Figure S1.pdf
- Figure S2.pdf
- Table S1. DESeq2_Statiscally Sig DE GENES.xlsx
- Table S2. IPA_canonical_pathways_BHpval.xls
- Table S3. IPA_molecular_functions_and_diseases_CATEGORIES_BHpval.xls
- Table S4. IPA_molecular_functions_and_diseases.xls
- Table S5. cell_to_cell_signaling_and_interactions_NETWORK_genes.xls
- Table S6.pdf
