# Supplementary material for: Mesenchymal Stromal Cell-Derived Small Extracellular Vesicles Modulate Apoptosis, TNF Alpha and Interferon Gamma Response Gene mRNA Expression in T Lymphocytes
Source: Int J Mol Sci. 2023 Sep 5;24(18):13689. doi: 10.3390/ijms241813689 (PMC10530670; doi:10.3390/ijms241813689)
Supplement: Supplementary file 1 [file ijms-24-13689-s001.zip › Table S1. DESeq2_Statiscally Sig DE GENES.xlsx]

## Sheet: DESeq2_res_all
Gene_stable_ID	Gene_name	Gene_description	baseMean	cAEAC.log2FoldChange	cAEAC.lfcSE	cAEAC.stat	cAEAC.pvalue	cAEAC.padj
ENSG00000005302	MSL3	MSL_complex_subunit_3	1646.9	-0.529098	0.160527	-3.29601	0.000980672	0.0779619
ENSG00000006652	IFRD1	interferon_related_developmental_regulator_1	813.273	-0.579938	0.147701	-3.92643	8.62155e-05	0.017802
ENSG00000008277	ADAM22	ADAM_metallopeptidase_domain_22	217.399	-0.736227	0.230431	-3.195	0.00139833	0.094279
ENSG00000013306	SLC25A39	solute_carrier_family_25_member_39	493.438	0.567168	0.175619	3.22954	0.00123992	0.0892045
ENSG00000013364	MVP	major_vault_protein	2257.48	0.48438	0.127301	3.80498	0.000141813	0.0248575
ENSG00000013441	CLK1	CDC_like_kinase_1	2282.28	-0.7143	0.130006	-5.49437	3.92116e-08	0.000113351
ENSG00000026751	SLAMF7	SLAM_family_member_7	1451.27	-0.481557	0.133113	-3.61765	0.000297291	0.036301
ENSG00000034677	RNF19A	ring_finger_protein_19A,_RBR_E3_ubiquitin_protein_ligase	7894.18	-0.471893	0.129138	-3.65417	0.000258015	0.0331492
ENSG00000059378	PARP12	poly(ADP-ribose)_polymerase_family_member_12	1115.63	-0.650764	0.162749	-3.99858	6.37237e-05	0.0145908
ENSG00000059728	MXD1	MAX_dimerization_protein_1	971.628	-0.57493	0.15967	-3.60073	0.000317319	0.0374405
ENSG00000060138	YBX3	Y-box_binding_protein_3	2043.09	0.462054	0.131695	3.50852	0.000450604	0.0480215
ENSG00000060558	GNA15	G_protein_subunit_alpha_15	1409.57	0.49743	0.132042	3.76722	0.000165074	0.0266958
ENSG00000063245	EPN1	epsin_1	346.485	0.581874	0.180912	3.21633	0.00129839	0.0912664
ENSG00000069493	CLEC2D	C-type_lectin_domain_family_2_member_D	4506.74	-0.45484	0.121061	-3.75711	0.000171884	0.027226
ENSG00000070010	UFD1	ubiquitin_recognition_factor_in_ER_associated_degradation_1	1132.07	-0.519205	0.155313	-3.34297	0.000828868	0.0703506
ENSG00000070081	NUCB2	nucleobindin_2	4002.95	0.497098	0.14814	3.3556	0.000791918	0.0678292
ENSG00000072163	LIMS2	LIM_zinc_finger_domain_containing_2	68.7928	1.08459	0.329102	3.29559	0.000982146	0.0779619
ENSG00000073712	FERMT2	fermitin_family_member_2	54.3604	-1.36379	0.393573	-3.46514	0.000529947	0.0544691
ENSG00000075624	ACTB	actin_beta	67949.2	0.509248	0.120811	4.21525	2.49507e-05	0.00836246
ENSG00000081059	TCF7	transcription_factor_7	4249.74	0.609237	0.165124	3.68956	0.000224643	0.0311312
ENSG00000083457	ITGAE	integrin_subunit_alpha_E	742.688	0.746922	0.218013	3.42604	0.000612443	0.0598646
ENSG00000085733	CTTN	cortactin	281.042	-0.681966	0.184	-3.70635	0.000210271	0.0302543
ENSG00000091972	CD200	CD200_molecule	250.524	-0.713375	0.188981	-3.77485	0.000160107	0.0260749
ENSG00000092871	RFFL	ring_finger_and_FYVE_like_domain_containing_E3_ubiquitin_protein_ligase	609.366	0.570886	0.155787	3.66453	0.000247791	0.0329334
ENSG00000095564	BTAF1	B-TFIID_TATA-box_binding_protein_associated_factor_1	5322.98	-0.790812	0.195036	-4.05469	5.02003e-05	0.0125337
ENSG00000097021	ACOT7	acyl-CoA_thioesterase_7	409.098	0.720473	0.175013	4.11669	3.8435e-05	0.0109734
ENSG00000099251	HSD17B7P2	hydroxysteroid_17-beta_dehydrogenase_7_pseudogene_2	99.9409	-0.869493	0.267649	-3.24864	0.00115959	0.086227
ENSG00000100216	TOMM22	translocase_of_outer_mitochondrial_membrane_22	561.079	0.612526	0.163392	3.7488	0.00017768	0.0277608
ENSG00000100298	APOBEC3H	apolipoprotein_B_mRNA_editing_enzyme_catalytic_subunit_3H	498.192	-0.613064	0.160309	-3.82426	0.000131164	0.023862
ENSG00000100376	FAM118A	family_with_sequence_similarity_118_member_A	401.295	-0.599593	0.180715	-3.31789	0.000906999	0.0743803
ENSG00000100941	PNN	pinin,_desmosome_associated_protein	4020.22	-0.594638	0.187301	-3.17477	0.00149954	0.0969585
ENSG00000100968	NFATC4	nuclear_factor_of_activated_T_cells_4	94.7024	-1.18861	0.277138	-4.28888	1.79573e-05	0.00638894
ENSG00000100991	TRPC4AP	transient_receptor_potential_cation_channel_subfamily_C_member_4_associated_protein	1165.06	-0.569473	0.153771	-3.70338	0.000212748	0.0303705
ENSG00000102349	KLF8	Kruppel_like_factor_8	236.624	-0.746075	0.218594	-3.41306	0.000642384	0.0605439
ENSG00000102531	FNDC3A	fibronectin_type_III_domain_containing_3A	1909.04	-0.411714	0.129977	-3.16758	0.00153715	0.0987293
ENSG00000102780	DGKH	diacylglycerol_kinase_eta	2509	-0.504273	0.126656	-3.98144	6.84994e-05	0.0152883
ENSG00000103187	COTL1	coactosin_like_F-actin_binding_protein_1	6482.86	0.462497	0.121884	3.79458	0.000147894	0.0248575
ENSG00000103811	CTSH	cathepsin_H	912.373	0.752043	0.171452	4.3863	1.15293e-05	0.00512741
ENSG00000103876	FAH	fumarylacetoacetate_hydrolase	478.859	0.579049	0.159997	3.61911	0.000295613	0.036301
ENSG00000103995	CEP152	centrosomal_protein_152	2242.09	-0.631184	0.144849	-4.35754	1.31535e-05	0.00553068
ENSG00000104490	NCALD	neurocalcin_delta	3619.95	0.604289	0.181163	3.3356	0.000851151	0.0710088
ENSG00000104863	LIN7B	lin-7_homolog_B,_crumbs_cell_polarity_complex_component	210.198	1.08497	0.260594	4.16344	3.13492e-05	0.00953392
ENSG00000106070	GRB10	growth_factor_receptor_bound_protein_10	106.15	-1.20629	0.274729	-4.39083	1.1292e-05	0.00512741
ENSG00000106591	MRPL32	mitochondrial_ribosomal_protein_L32	562.135	-0.577229	0.162732	-3.54712	0.000389465	0.0428894
ENSG00000106628	POLD2	DNA_polymerase_delta_2,_accessory_subunit	918.604	0.455033	0.13883	3.27763	0.00104683	0.0811579
ENSG00000106948	AKNA	AT-hook_transcription_factor	5319.53	0.400193	0.123259	3.24675	0.00116729	0.0865219
ENSG00000107560	RAB11FIP2	RAB11_family_interacting_protein_2	465.99	-0.592173	0.159031	-3.72362	0.000196386	0.0294363
ENSG00000108518	PFN1	profilin_1	12170.4	0.472178	0.116103	4.06689	4.76441e-05	0.0124973
ENSG00000108799	EZH1	enhancer_of_zeste_1_polycomb_repressive_complex_2_subunit	572.18	-0.72089	0.223659	-3.22316	0.00126783	0.0899935
ENSG00000108819	PPP1R9B	protein_phosphatase_1_regulatory_subunit_9B	2418.03	0.546877	0.130361	4.19509	2.72769e-05	0.00888459
ENSG00000108848	LUC7L3	LUC7_like_3_pre-mRNA_splicing_factor	5880.72	-0.85728	0.199459	-4.29803	1.7232e-05	0.00638894
ENSG00000109046	WSB1	WD_repeat_and_SOCS_box_containing_1	5285.71	-0.669852	0.19011	-3.52349	0.000425905	0.0458115
ENSG00000109062	SLC9A3R1	SLC9A3_regulator_1	1640.12	0.507015	0.12871	3.93922	8.17476e-05	0.0170315
ENSG00000109471	IL2	interleukin_2	69.7145	-1.36707	0.328578	-4.16058	3.1744e-05	0.00953392
ENSG00000109854	HTATIP2	HIV-1_Tat_interactive_protein_2	559.212	-0.634733	0.178625	-3.55344	0.000380234	0.0420731
ENSG00000109920	FNBP4	formin_binding_protein_4	3273.27	-0.45251	0.136783	-3.30822	0.000938902	0.0758259
ENSG00000109971	HSPA8	heat_shock_protein_family_A_(Hsp70)_member_8	25343.8	0.473641	0.148344	3.19287	0.00140868	0.0944265
ENSG00000110697	PITPNM1	phosphatidylinositol_transfer_protein_membrane_associated_1	1717.52	0.587941	0.161933	3.63076	0.000282586	0.0355168
ENSG00000110841	PPFIBP1	PPFIA_binding_protein_1	879.295	0.710806	0.212891	3.33883	0.000841333	0.0710088
ENSG00000110848	CD69	CD69_molecule	1751.93	-0.487104	0.136449	-3.56985	0.00035718	0.0402934
ENSG00000110944	IL23A	interleukin_23_subunit_alpha	707.019	-0.659889	0.18418	-3.58286	0.000339859	0.0391023
ENSG00000111863	ADTRP	androgen_dependent_TFPI_regulating_protein	630.775	-0.690976	0.169525	-4.07595	4.58276e-05	0.0121817
ENSG00000112218	GPR63	G_protein-coupled_receptor_63	84.6303	-1.02586	0.280587	-3.65611	0.000256067	0.0331094
ENSG00000113658	SMAD5	SMAD_family_member_5	453.077	-0.620161	0.187278	-3.31144	0.000928168	0.0755804
ENSG00000115155	OTOF	otoferlin	186.864	-0.8342	0.219334	-3.80333	0.000142766	0.0248575
ENSG00000115368	WDR75	WD_repeat_domain_75	1627.87	-0.412147	0.129643	-3.17908	0.00147743	0.0965169
ENSG00000116649	SRM	spermidine_synthase	312.674	0.648941	0.188284	3.4466	0.000567679	0.0571609
ENSG00000117226	GBP3	guanylate_binding_protein_3	359.815	-0.561548	0.175046	-3.20801	0.00133657	0.0922831
ENSG00000117394	SLC2A1	solute_carrier_family_2_member_1	2194.37	0.469468	0.140769	3.33502	0.000852936	0.0710088
ENSG00000117984	CTSD	cathepsin_D	571.587	0.768609	0.171305	4.48678	7.23064e-06	0.00381378
ENSG00000118242	MREG	melanoregulin	108.559	-0.815042	0.255809	-3.18614	0.00144185	0.0952692
ENSG00000119729	RHOQ	ras_homolog_family_member_Q	164.142	-0.791969	0.223479	-3.54382	0.00039438	0.0432248
ENSG00000119922	IFIT2	interferon_induced_protein_with_tetratricopeptide_repeats_2	2380.45	-1.08838	0.203267	-5.35444	8.58231e-08	0.000165395
ENSG00000120738	EGR1	early_growth_response_1	853.779	0.635281	0.146701	4.33046	1.48797e-05	0.00592223
ENSG00000120889	TNFRSF10B	TNF_receptor_superfamily_member_10b	1309.13	-0.532198	0.145437	-3.65931	0.000252895	0.0331094
ENSG00000120949	TNFRSF8	TNF_receptor_superfamily_member_8	641.863	0.790606	0.211623	3.73592	0.000187032	0.0284559
ENSG00000121594	CD80	CD80_molecule	153.359	-0.719818	0.22261	-3.23355	0.00122264	0.0883585
ENSG00000122417	ODF2L	outer_dense_fiber_of_sperm_tails_2_like	729.658	-0.515067	0.154099	-3.34243	0.000830481	0.0703506
ENSG00000123064	DDX54	DEAD-box_helicase_54	945.409	0.579794	0.142181	4.07785	4.54544e-05	0.0121817
ENSG00000123416	TUBA1B	tubulin_alpha_1b	10088.1	0.573388	0.125758	4.55944	5.12906e-06	0.00338899
ENSG00000123552	USP45	ubiquitin_specific_peptidase_45	434.634	-0.665371	0.163806	-4.06194	4.86662e-05	0.012505
ENSG00000124155	PIGT	phosphatidylinositol_glycan_anchor_biosynthesis_class_T	642.209	0.540137	0.154067	3.50586	0.00045514	0.0482824
ENSG00000124222	STX16	syntaxin_16	4099.5	-0.686584	0.158118	-4.34222	1.4105e-05	0.00572269
ENSG00000124496	TRERF1	transcriptional_regulating_factor_1	2427.42	0.619662	0.149177	4.15388	3.26891e-05	0.00969191
ENSG00000125534	PPDPF	pancreatic_progenitor_cell_differentiation_and_proliferation_factor	366.577	0.766878	0.210282	3.64691	0.000265413	0.0339113
ENSG00000125656	CLPP	caseinolytic_mitochondrial_matrix_peptidase_proteolytic_subunit	500.595	0.600334	0.160672	3.73639	0.000186681	0.0284559
ENSG00000126353	CCR7	C-C_motif_chemokine_receptor_7	6014.61	0.43863	0.11955	3.66899	0.000243506	0.0327402
ENSG00000126464	PRR12	proline_rich_12	607.889	0.566004	0.150809	3.75313	0.000174643	0.0274749
ENSG00000126705	AHDC1	AT-hook_DNA_binding_motif_containing_1	289.382	0.618465	0.18429	3.35593	0.000790981	0.0678292
ENSG00000127589	TUBBP1	tubulin_beta_pseudogene_1	304.552	0.593968	0.185989	3.19356	0.0014053	0.0944265
ENSG00000128699	ORMDL1	ORMDL_sphingolipid_biosynthesis_regulator_1	1156.25	-0.476909	0.149198	-3.19649	0.0013911	0.094066
ENSG00000130066	SAT1	spermidine/spermine_N1-acetyltransferase_1	2653.59	-0.630549	0.139864	-4.5083	6.53492e-06	0.00374627
ENSG00000130294	KIF1A	kinesin_family_member_1A	75.5764	-1.02807	0.321352	-3.19921	0.00137805	0.0934568
ENSG00000130592	LSP1	lymphocyte_specific_protein_1	4171.07	0.501664	0.123676	4.05628	4.98609e-05	0.0125337
ENSG00000130726	TRIM28	tripartite_motif_containing_28	3361.62	0.468609	0.129253	3.62552	0.000288386	0.035856
ENSG00000130749	ZC3H4	zinc_finger_CCCH-type_containing_4	1961.92	0.639144	0.128187	4.98603	6.16335e-07	0.00059389
ENSG00000130844	ZNF331	zinc_finger_protein_331	553.804	-0.541621	0.158479	-3.41762	0.000631711	0.0602442
ENSG00000131002	TXLNGY	taxilin_gamma_pseudogene,_Y-linked	1673.74	-0.602385	0.156455	-3.8502	0.00011802	0.0221897
ENSG00000131080	EDA2R	ectodysplasin_A2_receptor	195.104	-1.2918	0.237678	-5.43507	5.47754e-08	0.000124102
ENSG00000131791	PRKAB2	protein_kinase_AMP-activated_non-catalytic_subunit_beta_2	420.405	-0.822517	0.21111	-3.89616	9.77305e-05	0.0191535
ENSG00000132196	HSD17B7	hydroxysteroid_17-beta_dehydrogenase_7	291.565	-0.806702	0.183491	-4.39641	1.10058e-05	0.00512741
ENSG00000132274	TRIM22	tripartite_motif_containing_22	3857.78	-0.496735	0.131127	-3.78819	0.000151746	0.0250663
ENSG00000132424	PNISR	PNN_interacting_serine_and_arginine_rich_protein	6931.14	-0.762588	0.181277	-4.20675	2.5907e-05	0.00855892
ENSG00000132530	XAF1	XIAP_associated_factor_1	2835.26	-0.611729	0.149917	-4.08046	4.49474e-05	0.0121817
ENSG00000132589	FLOT2	flotillin_2	1356.99	0.442096	0.137664	3.21141	0.00132085	0.0922831
ENSG00000133111	RFXAP	regulatory_factor_X_associated_protein	431.009	-0.929338	0.169005	-5.49887	3.82243e-08	0.000113351
ENSG00000133858	ZFC3H1	zinc_finger_C3H1-type_containing	5400.68	-0.492729	0.134737	-3.65696	0.000255226	0.0331094
ENSG00000134365	CFHR4	complement_factor_H_related_4	450.95	1.21406	0.208358	5.82678	5.65075e-09	2.61358e-05
ENSG00000134460	IL2RA	interleukin_2_receptor_subunit_alpha	18505.8	0.403575	0.123683	3.26297	0.00110251	0.0838708
ENSG00000135074	ADAM19	ADAM_metallopeptidase_domain_19	6877.84	0.74619	0.167711	4.44925	8.61687e-06	0.00433204
ENSG00000135473	PAN2	poly(A)_specific_ribonuclease_subunit_PAN2	722.192	-0.752618	0.193106	-3.89745	9.72127e-05	0.0191535
ENSG00000135535	CD164	CD164_molecule	6395.67	-0.404516	0.123926	-3.26416	0.00109788	0.0837942
ENSG00000136149	RPL13AP25	ribosomal_protein_L13a_pseudogene_25	47.2147	1.46782	0.384158	3.82088	0.000132976	0.023862
ENSG00000136231	IGF2BP3	insulin_like_growth_factor_2_mRNA_binding_protein_3	68.5531	-1.21346	0.355276	-3.41555	0.00063653	0.0603295
ENSG00000136960	ENPP2	ectonucleotide_pyrophosphatase/phosphodiesterase_2	542.781	-0.526677	0.165909	-3.1745	0.00150096	0.0969585
ENSG00000137040	RANBP6	RAN_binding_protein_6	1052.48	-0.786793	0.197692	-3.9799	6.89448e-05	0.0152883
ENSG00000137414	FAM8A1	family_with_sequence_similarity_8_member_A1	609.133	-0.642642	0.16291	-3.94477	7.9877e-05	0.0168184
ENSG00000137959	IFI44L	interferon_induced_protein_44_like	15744	-0.756498	0.150674	-5.02076	5.14671e-07	0.000541013
ENSG00000137965	IFI44	interferon_induced_protein_44	5684.56	-0.716159	0.146004	-4.90507	9.33925e-07	0.000850784
ENSG00000138448	ITGAV	integrin_subunit_alpha_V	745.073	-0.493711	0.150177	-3.28752	0.00101072	0.0794378
ENSG00000138646	HERC5	HECT_and_RLD_domain_containing_E3_ubiquitin_protein_ligase_5	4279.8	-0.590708	0.17698	-3.33771	0.000844723	0.0710088
ENSG00000139193	CD27	CD27_molecule	1287.78	0.671145	0.132042	5.08283	3.71861e-07	0.000435413
ENSG00000139679	LPAR6	lysophosphatidic_acid_receptor_6	344.445	-0.987086	0.231506	-4.26377	2.01007e-05	0.00704317
ENSG00000140332	TLE3	transducin_like_enhancer_of_split_3	1769.39	0.66429	0.138699	4.78943	1.67258e-06	0.00128933
ENSG00000140564	FURIN	furin,_paired_basic_amino_acid_cleaving_enzyme	18597.9	0.5599	0.150237	3.72679	0.000193935	0.0293133
ENSG00000141510	TP53	tumor_protein_p53	1080.94	0.442921	0.137168	3.22904	0.00124206	0.0892045
ENSG00000141522	ARHGDIA	Rho_GDP_dissociation_inhibitor_alpha	2646.06	0.533475	0.131246	4.06469	4.80957e-05	0.0124973
ENSG00000141526	SLC16A3	solute_carrier_family_16_member_3	1860.88	0.495882	0.148997	3.32812	0.000874328	0.0722132
ENSG00000142002	DPP9	dipeptidyl_peptidase_9	955.855	0.482352	0.150666	3.20146	0.00136734	0.0931534
ENSG00000142669	SH3BGRL3	SH3_domain_binding_glutamate_rich_protein_like_3	3028.55	0.46256	0.128712	3.59377	0.000325922	0.0378757
ENSG00000143368	SF3B4	splicing_factor_3b_subunit_4	697.028	0.493634	0.146949	3.35922	0.000781614	0.0676989
ENSG00000143384	MCL1	MCL1,_BCL2_family_apoptosis_regulator	11869.9	-0.402756	0.126363	-3.18729	0.00143615	0.0952692
ENSG00000143429	LSP1P4	LSP1_pseudogene_4	61.0593	1.16133	0.336987	3.44622	0.000568495	0.0571609
ENSG00000146540	C7orf50	chromosome_7_open_reading_frame_50	181.197	0.712683	0.221981	3.21056	0.00132477	0.0922831
ENSG00000146592	CREB5	cAMP_responsive_element_binding_protein_5	42.532	-1.59086	0.406008	-3.91828	8.91819e-05	0.0180914
ENSG00000147162	OGT	O-linked_N-acetylglucosamine_(GlcNAc)_transferase	19647.3	-0.747838	0.165929	-4.50699	6.57541e-06	0.00374627
ENSG00000147454	SLC25A37	solute_carrier_family_25_member_37	719.477	-0.529636	0.14952	-3.54225	0.00039673	0.0432772
ENSG00000147459	DOCK5	dedicator_of_cytokinesis_5	689.835	1.12891	0.199486	5.65909	1.5218e-08	5.86551e-05
ENSG00000147535	PLPP5	phospholipid_phosphatase_5	378.434	-0.635139	0.198019	-3.20746	0.00133913	0.0922831
ENSG00000149311	ATM	ATM_serine/threonine_kinase	2504.92	-0.408346	0.128134	-3.18687	0.00143823	0.0952692
ENSG00000150656	CNDP1	carnosine_dipeptidase_1	1471.93	0.908619	0.202544	4.48603	7.25617e-06	0.00381378
ENSG00000151012	SLC7A11	solute_carrier_family_7_member_11	303.496	-0.764944	0.198947	-3.84497	0.000120568	0.0224859
ENSG00000152082	MZT2B	mitotic_spindle_organizing_protein_2B	599.685	0.482548	0.149677	3.22392	0.00126449	0.0899935
ENSG00000152527	PLEKHH2	pleckstrin_homology,_MyTH4_and_FERM_domain_containing_H2	177.557	-0.793143	0.216948	-3.65591	0.000256274	0.0331094
ENSG00000152582	SPEF2	sperm_flagellar_2	827.651	-0.550777	0.16946	-3.2502	0.00115324	0.0860318
ENSG00000152689	RASGRP3	RAS_guanyl_releasing_protein_3	243.157	-0.698782	0.205998	-3.39219	0.000693374	0.0626366
ENSG00000153879	CEBPG	CCAAT_enhancer_binding_protein_gamma	866.227	-0.589315	0.159501	-3.69474	0.00022011	0.0310382
ENSG00000154127	UBASH3B	ubiquitin_associated_and_SH3_domain_containing_B	2423.25	0.530939	0.128855	4.12043	3.78168e-05	0.0109319
ENSG00000154655	L3MBTL4	L3MBTL4,_histone_methyl-lysine_binding_protein	213.519	1.21451	0.232077	5.23322	1.66586e-07	0.000256832
ENSG00000155629	PIK3AP1	phosphoinositide-3-kinase_adaptor_protein_1	1342.53	0.551544	0.146688	3.75997	0.000169931	0.0271022
ENSG00000157514	TSC22D3	TSC22_domain_family_member_3	645.166	-0.611471	0.16488	-3.70859	0.000208414	0.0302543
ENSG00000157741	UBN2	ubinuclein_2	1069.09	-0.466672	0.144285	-3.23437	0.00121911	0.0883585
ENSG00000157796	WDR19	WD_repeat_domain_19	178.748	-0.725258	0.223581	-3.24382	0.00117938	0.0871385
ENSG00000158710	TAGLN2	transgelin_2	4318.2	0.548376	0.12173	4.50486	6.64175e-06	0.00374627
ENSG00000158856	DMTN	dematin_actin_binding_protein	146.837	0.792658	0.236127	3.35692	0.000788168	0.0678292
ENSG00000160183	TMPRSS3	transmembrane_serine_protease_3	1321.22	-0.516981	0.148033	-3.49234	0.000478806	0.050561
ENSG00000160593	JAML	junction_adhesion_molecule_like	3191.32	-0.464082	0.130525	-3.5555	0.000377257	0.0420731
ENSG00000161847	RAVER1	ribonucleoprotein,_PTB_binding_1	661.393	0.605676	0.181921	3.32933	0.000870548	0.0721588
ENSG00000162496	DHRS3	dehydrogenase/reductase_3	963.41	0.49055	0.154361	3.17794	0.00148324	0.0966235
ENSG00000162909	CAPN2	calpain_2	2020.24	-0.456556	0.132047	-3.45752	0.000545163	0.0555394
ENSG00000163380	LMOD3	leiomodin_3	2817.06	0.803343	0.187126	4.29305	1.76234e-05	0.00638894
ENSG00000163568	AIM2	absent_in_melanoma_2	333.951	-0.583536	0.171765	-3.39729	0.000680564	0.0619635
ENSG00000163735	CXCL5	C-X-C_motif_chemokine_ligand_5	13.4971	3.0042	0.868614	3.45861	0.000542972	0.0555394
ENSG00000164062	APEH	acylaminoacyl-peptide_hydrolase	908.281	0.508207	0.148509	3.42207	0.000621472	0.059884
ENSG00000164211	STARD4	StAR_related_lipid_transfer_domain_containing_4	3471.21	-0.443692	0.12472	-3.5575	0.000374406	0.0420316
ENSG00000164938	TP53INP1	tumor_protein_p53_inducible_nuclear_protein_1	1132.67	-0.520689	0.157453	-3.30694	0.000943224	0.0758259
ENSG00000165996	HACD1	3-hydroxyacyl-CoA_dehydratase_1	74.3671	0.973149	0.306323	3.17687	0.00148873	0.0967088
ENSG00000166012	TAF1D	TATA-box_binding_protein_associated_factor,_RNA_polymerase_I_subunit_D	4054.2	-0.507309	0.126703	-4.00392	6.23011e-05	0.0145908
ENSG00000167173	C15orf39	chromosome_15_open_reading_frame_39	425.63	0.814656	0.174584	4.66627	3.06712e-06	0.0021494
ENSG00000167196	FBXO22	F-box_protein_22	848.308	-0.48767	0.15131	-3.22299	0.00126861	0.0899935
ENSG00000167550	RHEBL1	RHEB_like_1	134.337	-0.851484	0.250432	-3.40006	0.000673711	0.061582
ENSG00000167632	TRAPPC9	trafficking_protein_particle_complex_9	479.341	0.51267	0.158414	3.23627	0.00121105	0.088349
ENSG00000167658	EEF2	eukaryotic_translation_elongation_factor_2	26685.5	0.461847	0.14427	3.20128	0.00136821	0.0931534
ENSG00000167785	ZNF558	zinc_finger_protein_558	644.43	-0.583305	0.170518	-3.42078	0.000624424	0.0599188
ENSG00000167797	CDK2AP2	cyclin_dependent_kinase_2_associated_protein_2	598.41	0.557173	0.152236	3.65993	0.000252282	0.0331094
ENSG00000167815	PRDX2	peroxiredoxin_2	1868.43	0.409598	0.127013	3.22485	0.00126039	0.0899935
ENSG00000167900	TK1	thymidine_kinase_1	1199.01	0.469822	0.13883	3.38414	0.00071401	0.0642498
ENSG00000168243	GNG4	G_protein_subunit_gamma_4	137.626	0.913491	0.247104	3.69679	0.000218346	0.0309783
ENSG00000168615	ADAM9	ADAM_metallopeptidase_domain_9	571.682	-0.508186	0.158735	-3.20147	0.00136729	0.0931534
ENSG00000168803	ADAL	adenosine_deaminase_like	466.138	0.653691	0.182868	3.57467	0.000350674	0.0399492
ENSG00000168876	ANKRD49	ankyrin_repeat_domain_49	595.898	-0.587955	0.164022	-3.5846	0.00033759	0.0390355
ENSG00000169100	SLC25A6	solute_carrier_family_25_member_6	2692.68	0.438269	0.131423	3.3348	0.000853603	0.0710088
ENSG00000169155	ZBTB43	zinc_finger_and_BTB_domain_containing_43	1222.72	-0.624023	0.160877	-3.87887	0.000104943	0.0198926
ENSG00000169710	FASN	fatty_acid_synthase	3732.03	0.607269	0.137348	4.42139	9.80661e-06	0.00482527
ENSG00000169871	TRIM56	tripartite_motif_containing_56	3910.69	-0.451423	0.142792	-3.1614	0.00157014	0.0997559
ENSG00000170074	FAM153A	family_with_sequence_similarity_153_member_A	402.443	-0.853987	0.182776	-4.67231	2.97836e-06	0.0021494
ENSG00000170464	DNAJC18	DnaJ_heat_shock_protein_family_(Hsp40)_member_C18	437.257	-0.575789	0.175085	-3.28862	0.00100679	0.0794378
ENSG00000170476	MZB1	marginal_zone_B_and_B1_cell_specific_protein	241.347	-0.89216	0.210417	-4.23997	2.23552e-05	0.00760299
ENSG00000170515	PA2G4	proliferation-associated_2G4	3151.99	0.465159	0.146822	3.16819	0.00153393	0.0987293
ENSG00000170689	HOXB9	homeobox_B9	79.1147	-1.19112	0.371399	-3.2071	0.00134079	0.0922831
ENSG00000170921	TANC2	tetratricopeptide_repeat,_ankyrin_repeat_and_coiled-coil_containing_2	886.836	0.463702	0.14165	3.27358	0.00106193	0.0815887
ENSG00000172081	MOB3A	MOB_kinase_activator_3A	2523.94	0.549954	0.14077	3.90675	9.35476e-05	0.018812
ENSG00000172270	BSG	basigin_(Ok_blood_group)	1442.57	0.488425	0.135767	3.59754	0.000321242	0.0375204
ENSG00000172432	GTPBP2	GTP_binding_protein_2	864.32	-0.456372	0.142233	-3.20861	0.00133378	0.0922831
ENSG00000172543	CTSW	cathepsin_W	2193.3	0.476935	0.132164	3.60866	0.000307788	0.0368344
ENSG00000172687	ZNF738	zinc_finger_protein_738	326.038	-0.652618	0.204804	-3.18656	0.00143978	0.0952692
ENSG00000172757	CFL1	cofilin_1	6497.04	0.61476	0.127522	4.82082	1.42966e-06	0.0011808
ENSG00000172840	PDP2	pyruvate_dehyrogenase_phosphatase_catalytic_subunit_2	1744.62	-0.420858	0.12922	-3.25693	0.00112626	0.0851174
ENSG00000173200	PARP15	poly(ADP-ribose)_polymerase_family_member_15	752.116	-0.581608	0.162892	-3.57052	0.000356268	0.0402934
ENSG00000173706	HEG1	heart_development_protein_with_EGF_like_domains_1	1775.36	0.481772	0.141276	3.41015	0.000649265	0.0605439
ENSG00000173762	CD7	CD7_molecule	3723.7	0.52424	0.140878	3.72124	0.000198247	0.0294363
ENSG00000174010	KLHL15	kelch_like_family_member_15	1295.63	-0.549105	0.149618	-3.67005	0.000242503	0.0327402
ENSG00000174255	ZNF80	zinc_finger_protein_80	62.1076	-1.17626	0.359006	-3.27644	0.00105123	0.0811579
ENSG00000174547	MRPL11	mitochondrial_ribosomal_protein_L11	479.507	0.662595	0.174192	3.80382	0.000142483	0.0248575
ENSG00000174804	FZD4	frizzled_class_receptor_4	75.6766	-1.71023	0.349	-4.90038	9.56516e-07	0.000850784
ENSG00000174903	RAB1B	RAB1B,_member_RAS_oncogene_family	1415.93	0.496206	0.135077	3.67349	0.000239258	0.0325475
ENSG00000175197	DDIT3	DNA_damage_inducible_transcript_3	217.133	-0.9206	0.212752	-4.32709	1.5109e-05	0.00592223
ENSG00000175416	CLTB	clathrin_light_chain_B	145.66	0.734789	0.231032	3.18046	0.00147042	0.0963315
ENSG00000175548	ALG10B	ALG10B,_alpha-1,2-glucosyltransferase	751.996	-0.640302	0.153142	-4.1811	2.90096e-05	0.00919009
ENSG00000175567	UCP2	uncoupling_protein_2	1815.91	0.489964	0.129208	3.79205	0.000149407	0.0248575
ENSG00000175893	ZDHHC21	zinc_finger_DHHC-type_containing_21	451.531	-0.561037	0.168961	-3.3205	0.000898554	0.07395
ENSG00000176340	COX8A	cytochrome_c_oxidase_subunit_8A	610.911	0.692796	0.165572	4.18426	2.861e-05	0.00918938
ENSG00000176597	B3GNT5	UDP-GlcNAc:betaGal_beta-1,3-N-acetylglucosaminyltransferase_5	338.322	-0.621111	0.181044	-3.43073	0.000601961	0.059238
ENSG00000177034	MTX3	metaxin_3	1763.81	-0.604993	0.140953	-4.29216	1.76947e-05	0.00638894
ENSG00000177374	HIC1	HIC_ZBTB_transcriptional_repressor_1	267.669	0.885233	0.190422	4.6488	3.33871e-06	0.00227091
ENSG00000177383	MAGEF1	MAGE_family_member_F1	224.69	-0.773489	0.227279	-3.40326	0.000665873	0.0614469
ENSG00000177409	SAMD9L	sterile_alpha_motif_domain_containing_9_like	6418.43	-0.491416	0.129352	-3.79905	0.000145254	0.0248575
ENSG00000179532	DNHD1	dynein_heavy_chain_domain_1	1097.39	-0.537383	0.164858	-3.25967	0.00111541	0.0845738
ENSG00000179632	MAF1	MAF1_homolog,_negative_regulator_of_RNA_polymerase_III	524.977	0.512118	0.154405	3.31672	0.000910801	0.0744282
ENSG00000179820	MYADM	myeloid_associated_differentiation_marker	879.971	0.53003	0.152163	3.48331	0.000495251	0.0515909
ENSG00000180008	SOCS4	suppressor_of_cytokine_signaling_4	1462.85	-0.62064	0.172493	-3.59805	0.000320606	0.0375204
ENSG00000180354	MTURN	maturin,_neural_progenitor_differentiation_regulator_homolog	147.734	-0.863143	0.237991	-3.62679	0.000286969	0.035856
ENSG00000180667	YOD1	YOD1_deubiquitinase	716.69	-0.528728	0.146558	-3.60764	0.000308998	0.0368344
ENSG00000181104	F2R	coagulation_factor_II_thrombin_receptor	237.671	-0.845526	0.193566	-4.36814	1.25307e-05	0.00536638
ENSG00000181690	PLAG1	PLAG1_zinc_finger	579.459	-0.506138	0.1572	-3.2197	0.00128323	0.0907521
ENSG00000181722	ZBTB20	zinc_finger_and_BTB_domain_containing_20	2906.9	1.29114	0.202609	6.37255	1.85911e-10	2.14969e-06
ENSG00000181904	C5orf24	chromosome_5_open_reading_frame_24	971.431	-0.564214	0.152247	-3.70592	0.000210626	0.0302543
ENSG00000182253	SYNM	synemin	116.827	-0.900388	0.254296	-3.54071	0.000399059	0.0433269
ENSG00000182472	CAPN12	calpain_12	184.352	-0.882814	0.238093	-3.70786	0.000209017	0.0302543
ENSG00000182700	IGIP	IgA_inducing_protein	233.38	-0.68447	0.202712	-3.37656	0.000733972	0.0651002
ENSG00000182903	ZNF721	zinc_finger_protein_721	927.37	-0.461986	0.141208	-3.27166	0.00106918	0.0818738
ENSG00000183486	MX2	MX_dynamin_like_GTPase_2	1685.61	-0.654629	0.164551	-3.97829	6.9414e-05	0.0152883
ENSG00000183684	ALYREF	Aly/REF_export_factor	570.916	0.639176	0.158963	4.02091	5.79749e-05	0.0141129
ENSG00000183891	TTC32	tetratricopeptide_repeat_domain_32	298.869	-0.869278	0.230955	-3.76384	0.000167326	0.0268722
ENSG00000184009	ACTG1	actin_gamma_1	30145.6	0.46748	0.116738	4.00452	6.21438e-05	0.0145908
ENSG00000184640	SEPT9	septin_9	5048.42	0.441568	0.128947	3.42443	0.000616094	0.0598646
ENSG00000185641	AC034236.1	ribosomal_protein_S25_(RPS25)_pseudogene	132.37	1.56449	0.288559	5.42172	5.90297e-08	0.000124102
ENSG00000185946	RNPC3	RNA_binding_region_(RNP1,_RRM)_containing_3	868.794	-0.806032	0.21539	-3.74219	0.000182421	0.0281245
ENSG00000186185	KIF18B	kinesin_family_member_18B	754.742	0.475926	0.149537	3.18267	0.00145925	0.095871
ENSG00000186834	HEXIM1	hexamethylene_bisacetamide_inducible_1	1078.73	-0.573332	0.150831	-3.80116	0.000144018	0.0248575
ENSG00000188282	RUFY4	RUN_and_FYVE_domain_containing_4	32.8602	-1.74906	0.470073	-3.72083	0.000198567	0.0294363
ENSG00000188486	H2AFX	H2A_histone_family_member_X	1153.85	0.576189	0.146846	3.92376	8.71782e-05	0.0178414
ENSG00000189007	ADAT2	adenosine_deaminase,_tRNA_specific_2	780.281	-0.504488	0.153721	-3.28184	0.00103133	0.0803047
ENSG00000189058	APOD	apolipoprotein_D	496.836	0.984011	0.193686	5.08044	3.76557e-07	0.000435413
ENSG00000196116	TDRD7	tudor_domain_containing_7	427.53	-0.590214	0.163314	-3.61398	0.00030153	0.0365088
ENSG00000196230	TUBB	tubulin_beta_class_I	24307.4	0.400186	0.124337	3.21857	0.00128833	0.090835
ENSG00000196247	ZNF107	zinc_finger_protein_107	1395.36	-0.486157	0.131703	-3.69131	0.0002231	0.0311312
ENSG00000196440	ARMCX4	armadillo_repeat_containing_X-linked_4	186.383	-0.790821	0.240607	-3.28678	0.00101339	0.0794378
ENSG00000196911	KPNA5	karyopherin_subunit_alpha_5	418.237	-0.655484	0.164232	-3.99121	6.57378e-05	0.0149044
ENSG00000196924	FLNA	filamin_A	31456.4	0.47753	0.120573	3.9605	7.47926e-05	0.016165
ENSG00000197149	AC107956.1	ribosomal_protein_S2_(RPS2)_pseudogene	140.529	1.02935	0.2605	3.95143	7.76855e-05	0.0166348
ENSG00000197381	ADARB1	adenosine_deaminase,_RNA_specific_B1	521.433	-0.574882	0.167032	-3.44175	0.000577964	0.0576121
ENSG00000197594	ENPP1	ectonucleotide_pyrophosphatase/phosphodiesterase_1	436.253	1.24914	0.23685	5.27399	1.33492e-07	0.00022957
ENSG00000197601	FAR1	fatty_acyl-CoA_reductase_1	1621.02	-0.533356	0.144566	-3.68937	0.000224808	0.0311312
ENSG00000197858	GPAA1	glycosylphosphatidylinositol_anchor_attachment_1	326.075	0.80742	0.212812	3.79406	0.000148203	0.0248575
ENSG00000197943	PLCG2	phospholipase_C_gamma_2	447.086	-0.601349	0.185774	-3.23699	0.00120797	0.088349
ENSG00000197989	SNHG12	small_nucleolar_RNA_host_gene_12	267.956	-0.913587	0.25115	-3.63761	0.000275176	0.0347744
ENSG00000198743	SLC5A3	solute_carrier_family_5_member_3	6489.36	-0.70561	0.136055	-5.18621	2.14618e-07	0.000291956
ENSG00000198744	MTCO3P12	MT-CO3_pseudogene_12	2108.81	1.24041	0.199724	6.21061	5.27794e-10	4.06859e-06
ENSG00000198804	MT-CO1	mitochondrially_encoded_cytochrome_c_oxidase_I	196829	0.778769	0.197436	3.94441	7.99976e-05	0.0168184
ENSG00000198825	INPP5F	inositol_polyphosphate-5-phosphatase_F	935.659	-0.713308	0.148798	-4.79381	1.63644e-06	0.00128933
ENSG00000202198	RF00100	?	55.9176	1.24878	0.378597	3.29845	0.000972203	0.0777964
ENSG00000203709	MIR29B2CHG	MIR29B2_and_MIR29C_host_gene	112.837	-0.788797	0.249082	-3.16682	0.00154118	0.0987293
ENSG00000204116	CHIC1	cysteine_rich_hydrophobic_domain_1	295.176	-0.701194	0.190844	-3.67418	0.000238616	0.0325475
ENSG00000204131	NHSL2	NHS_like_2	135.721	0.975072	0.291687	3.34287	0.000829153	0.0703506
ENSG00000204161	TMEM273	transmembrane_protein_273	344.088	-0.585684	0.173885	-3.36822	0.000756563	0.0660237
ENSG00000204186	ZDBF2	zinc_finger_DBF-type_containing_2	1176.44	-0.534025	0.149326	-3.57624	0.000348573	0.0399064
ENSG00000204463	BAG6	BCL2_associated_athanogene_6	2857.74	0.424876	0.12353	3.43944	0.000582913	0.0578559
ENSG00000204469	PRRC2A	proline_rich_coiled-coil_2A	8373.45	0.411395	0.119204	3.4512	0.000558105	0.0566085
ENSG00000204677	FAM153C	family_with_sequence_similarity_153_member_C	215.883	-0.844581	0.21673	-3.89693	9.74213e-05	0.0191535
ENSG00000206448	PPIAP30	peptidylprolyl_isomerase_A_pseudogene_30	242.688	0.71201	0.204368	3.48396	0.00049405	0.0515909
ENSG00000206573	THUMPD3-AS1	THUMPD3_antisense_RNA_1	358.789	-0.836362	0.240938	-3.47127	0.000518008	0.0534797
ENSG00000213315	AL122020.1	ribosomal_protein_S18_(RPS18)_pseudogene	217.535	0.899427	0.221876	4.05375	5.04037e-05	0.0125337
ENSG00000213625	LEPROT	leptin_receptor_overlapping_transcript	513.156	-0.507184	0.15915	-3.18682	0.00143845	0.0952692
ENSG00000213763	ACTBP2	actin,_beta_pseudogene_2	282.44	0.873199	0.184642	4.72914	2.25476e-06	0.00168205
ENSG00000214182	PTMAP5	prothymosin_alpha_pseudogene_5	379.678	0.821051	0.186292	4.40733	1.04652e-05	0.00504202
ENSG00000214391	TUBAP2	tubulin_alpha_pseudogene_2	258.445	0.858712	0.189849	4.52313	6.09315e-06	0.00374627
ENSG00000214575	CPEB1	cytoplasmic_polyadenylation_element_binding_protein_1	70.5595	1.04296	0.318361	3.27602	0.00105281	0.0811579
ENSG00000215039	CD27-AS1	CD27_antisense_RNA_1	235.409	-1.01539	0.201934	-5.02835	4.94707e-07	0.000541013
ENSG00000217482	HMGB1P17	high_mobility_group_box_1_pseudogene_17	180.462	-0.870577	0.217652	-3.99986	6.33811e-05	0.0145908
ENSG00000217624	AL627402.1	tyrosine_3-monooxygenase/tryptophan_5-monooxygenase_activation_protein,_zeta_polypeptide_(YWHAZ)_pseudogene	64.9128	1.05281	0.32473	3.2421	0.00118652	0.0873865
ENSG00000218175	AC016739.1	ribosomal_protein,_large,_P1_(RPLP1)_pseudogene	259.113	0.869086	0.217296	3.99955	6.34641e-05	0.0145908
ENSG00000220157	HNRNPA1P12	heterogeneous_nuclear_ribonucleoprotein_A1_pseudogene_12	96.5866	0.917636	0.271339	3.38188	0.00071991	0.0645296
ENSG00000220267	ACTBP8	actin,_beta_pseudogene_8	102.567	0.867346	0.268177	3.23423	0.0012197	0.0883585
ENSG00000220323	HIST2H2BD	histone_cluster_2_H2B_family_member_d_(pseudogene)	166.681	-1.05887	0.320228	-3.30662	0.000944299	0.0758259
ENSG00000223668	EEF1A1P24	eukaryotic_translation_elongation_factor_1_alpha_1_pseudogene_24	305.279	0.652814	0.187553	3.48069	0.000500115	0.051864
ENSG00000223745	CCDC18-AS1	CCDC18_antisense_RNA_1	549.458	-1.02628	0.2361	-4.3468	1.38137e-05	0.00570456
ENSG00000224391	LINC01280	long_intergenic_non-protein_coding_RNA_1280	221.41	1.67978	0.256366	6.55228	5.66656e-11	1.31045e-06
ENSG00000225405	RPS15AP17	ribosomal_protein_S15a_pseudogene_17	61.6689	1.27082	0.371094	3.42453	0.000615858	0.0598646
ENSG00000225964	NRIR	negative_regulator_of_interferon_response	53.4279	-1.69194	0.378355	-4.47183	7.75545e-06	0.00398561
ENSG00000225972	MTND1P23	MT-ND1_pseudogene_23	656.792	1.02362	0.198469	5.15756	2.50195e-07	0.000321445
ENSG00000226396	AL031727.1	ribosomal_protein_S14_(RPS14)_pseudogene	118.839	0.887745	0.273	3.25181	0.00114673	0.0858228
ENSG00000226532	AL022718.1	pseudogene_similar_to_part_of_ribosomal_protein,_large,_P1_(RPLP1)	95.693	2.04882	0.34496	5.93929	2.86267e-09	1.65505e-05
ENSG00000226540	GAPDHP73	glyceraldehyde-3-phosphate_dehydrogenase_pseudogene_73	51.0223	1.27726	0.392551	3.25373	0.00113901	0.0858001
ENSG00000226979	LTA	lymphotoxin_alpha	1303.02	0.701537	0.168495	4.16355	3.13339e-05	0.00953392
ENSG00000227039	ITGB2-AS1	ITGB2_antisense_RNA_1	75.1533	-1.23371	0.339095	-3.63825	0.000274496	0.0347744
ENSG00000227671	AL390728.4	zinc_finger_protein_pseudogene	1340.88	-0.699365	0.205375	-3.40531	0.000660899	0.0613813
ENSG00000228224	NACA4P	NACA_family_member_4,_pseudogene	139.8	0.83258	0.251566	3.30958	0.000934357	0.0758174
ENSG00000228526	MIR34AHG	MIR34A_host_gene	268.796	-0.927856	0.256243	-3.621	0.000293466	0.0362925
ENSG00000228863	AL121985.1	novel_transcript,_antisense_to_CD48	260.368	-0.826976	0.24504	-3.37487	0.000738518	0.0651869
ENSG00000228929	RPS13P2	ribosomal_protein_S13_pseudogene_2	77.2232	1.24765	0.32898	3.79249	0.000149145	0.0248575
ENSG00000229191	AL358473.1	novel_transcript,_antisense_KIF21B	257.304	-1.10965	0.25701	-4.31755	1.57772e-05	0.00608105
ENSG00000229474	PATL2	PAT1_homolog_2	351.638	-0.958414	0.191676	-5.00018	5.72771e-07	0.000575908
ENSG00000229727	AC013460.1	?	96.4596	-1.06343	0.283798	-3.74714	0.000178862	0.0277608
ENSG00000229806	RPS15P5	ribosomal_protein_S15_pseudogene_5	272.833	0.664713	0.204367	3.25254	0.00114377	0.0858228
ENSG00000230170	HNRNPA1P28	heterogeneous_nuclear_ribonucleoprotein_A1_pseudogene_28	141.913	0.884538	0.241212	3.66706	0.000245357	0.0327984
ENSG00000230629	RPS23P8	ribosomal_protein_S23_pseudogene_8	148.742	0.894165	0.263419	3.39445	0.000687656	0.0623637
ENSG00000230916	MTCO1P53	MT-CO1_pseudogene_53	436.576	0.827475	0.188492	4.38996	1.13369e-05	0.00512741
ENSG00000231721	LINC-PINT	long_intergenic_non-protein_coding_RNA,_p53_induced_transcript	247.729	-1.0573	0.194296	-5.4417	5.27746e-08	0.000124102
ENSG00000231925	TAPBP	TAP_binding_protein	5659.31	0.497467	0.130205	3.82064	0.000133105	0.023862
ENSG00000233057	EEF1A1P14	eukaryotic_translation_elongation_factor_1_alpha_1_pseudogene_14	469.133	0.528775	0.164874	3.20715	0.00134058	0.0922831
ENSG00000233355	CHRM3-AS2	CHRM3_antisense_RNA_2	533.264	-0.936233	0.180235	-5.19452	2.05253e-07	0.000291956
ENSG00000233534	AL035604.1	?	57.7257	-1.50349	0.334178	-4.49908	6.82497e-06	0.00375796
ENSG00000234604	AL021068.2	ATP_synthase_6_(MTATP6)_pseudogene	91.6179	1.44013	0.335288	4.2952	1.74539e-05	0.00638894
ENSG00000234683	AL138799.3	ribosomal_protein_S20_(RPS20)_pseudogene	24.9839	1.7279	0.539801	3.20099	0.00136955	0.0931534
ENSG00000234741	GAS5	growth_arrest_specific_5	2410.33	-0.513571	0.127128	-4.03981	5.34936e-05	0.0131606
ENSG00000235703	LINC00894	long_intergenic_non-protein_coding_RNA_894	111.991	-0.929753	0.276772	-3.35927	0.000781481	0.0676989
ENSG00000236439	AC099336.2	ribosomal_protein_S27_(metallopanstimulin_1)_(RPS27)_pseudogene	233.842	0.786952	0.213423	3.68729	0.000226656	0.0312003
ENSG00000236468	AC099335.1	eukaryotic_translation_elongation_factor_1_alpha_1_(EEF1A1)_pseudogene	183.915	0.981993	0.310478	3.16285	0.00156234	0.0995333
ENSG00000237550	RPL9P9	ribosomal_protein_L9_pseudogene_9	314.714	0.978923	0.238473	4.10497	4.04369e-05	0.0114042
ENSG00000237973	MTCO1P12	MT-CO1_pseudogene_12	4962.4	0.705616	0.17248	4.09101	4.29504e-05	0.0119671
ENSG00000238172	RPS2P35	ribosomal_protein_S2_pseudogene_35	167.35	0.818361	0.233166	3.50977	0.000448494	0.0480179
ENSG00000239559	RPL37P2	ribosomal_protein_L37_pseudogene_2	269.446	1.21228	0.277189	4.37347	1.22287e-05	0.00533586
ENSG00000240463	RPS19P3	ribosomal_protein_S19_pseudogene_3	154.449	0.999054	0.26289	3.80027	0.000144539	0.0248575
ENSG00000240652	AP001024.1	ribosomal_protein,_large,_P2_(RPLP2)_pseudogene	95.064	1.18306	0.308236	3.83815	0.000123965	0.0229345
ENSG00000240972	MIF	macrophage_migration_inhibitory_factor	95.5972	1.18767	0.29105	4.08063	4.49136e-05	0.0121817
ENSG00000241429	EEF1A1P25	eukaryotic_translation_elongation_factor_1_alpha_1_pseudogene_25	784.628	0.655755	0.190386	3.44435	0.000572425	0.057307
ENSG00000241490	AC093010.2	?	120.199	-0.936458	0.258917	-3.61682	0.000298244	0.036301
ENSG00000241553	ARPC4	actin_related_protein_2/3_complex_subunit_4	700.619	0.520038	0.153871	3.37971	0.00072562	0.0647903
ENSG00000243335	KCTD7	potassium_channel_tetramerization_domain_containing_7	341.542	-0.853956	0.222975	-3.82982	0.000128237	0.0235367
ENSG00000243680	RPL37P23	ribosomal_protein_L37_pseudogene_23	84.1103	1.21957	0.361216	3.37628	0.000734721	0.0651002
ENSG00000243742	RPLP0P2	ribosomal_protein_lateral_stalk_subunit_P0_pseudogene_2	136.326	1.33203	0.25292	5.2666	1.38977e-07	0.00022957
ENSG00000244398	AC116533.1	ribosomal_protein_L36a_(RPL36A)_pseudogene	91.2423	1.47079	0.388597	3.78488	0.000153785	0.0252229
ENSG00000244879	GABPB1-AS1	GABPB1_antisense_RNA_1	4178.56	-0.662411	0.170495	-3.88523	0.000102232	0.0197018
ENSG00000245556	SCAMP1-AS1	SCAMP1_antisense_RNA_1	75.0154	-1.06168	0.293908	-3.61229	0.000303505	0.0365565
ENSG00000245694	CRNDE	colorectal_neoplasia_differentially_expressed	41.0402	-1.4526	0.416279	-3.48947	0.000483971	0.0508741
ENSG00000245954	LINC02273	long_intergenic_non-protein_coding_RNA_2273	144.947	0.828713	0.242869	3.41218	0.000644445	0.0605439
ENSG00000247763	AC106800.1	tubulin,_alpha_1b_(TUBA1B)_pseudogene	62.048	1.05951	0.332746	3.18413	0.00145188	0.0956588
ENSG00000247828	TMEM161B-AS1	TMEM161B_antisense_RNA_1	197.171	-0.802927	0.222816	-3.60355	0.000313903	0.0372272
ENSG00000248923	MTND5P11	MT-ND5_pseudogene_11	903.108	0.558598	0.164157	3.40283	0.00066692	0.0614469
ENSG00000249859	PVT1	Pvt1_oncogene	242.033	-0.644284	0.203637	-3.16388	0.00155683	0.0994567
ENSG00000251247	ZNF345	zinc_finger_protein_345	146.568	-0.807039	0.239322	-3.37219	0.000745719	0.0653239
ENSG00000255717	SNHG1	small_nucleolar_RNA_host_gene_1	1546	-0.681962	0.170519	-3.99934	6.35196e-05	0.0145908
ENSG00000256148	AP000763.2	mitochondrially_encoded_cytochrome_c_oxidase_I_(MT-COI)_pseudogene	255.738	0.819568	0.196455	4.17179	3.02213e-05	0.00944457
ENSG00000257242	LINC01619	long_intergenic_non-protein_coding_RNA_1619	74.4783	-1.00777	0.294924	-3.41705	0.000633025	0.0602442
ENSG00000258017	AC011603.2	novel_transcript,_antisense_to_TUBA1B	28.0952	4.41538	1.34004	3.29495	0.000984384	0.0779619
ENSG00000259045	MTCO1P2	MT-CO1_pseudogene_2	595.406	0.837257	0.197468	4.23996	2.23559e-05	0.00760299
ENSG00000259363	AC090825.1	?	42.8114	-1.30774	0.384445	-3.40163	0.000669848	0.0614719
ENSG00000259865	AL390728.6	novel_transcript	230.422	-1.00944	0.208071	-4.8514	1.22593e-06	0.00105003
ENSG00000260032	NORAD	non-coding_RNA_activated_by_DNA_damage	3483.49	-0.402492	0.124222	-3.24009	0.00119492	0.087726
ENSG00000260260	SNHG19	small_nucleolar_RNA_host_gene_19	27.4377	-1.56671	0.476804	-3.28585	0.00101676	0.0794378
ENSG00000263266	RPS7P1	ribosomal_protein_S7_pseudogene_1	151.84	1.03187	0.249295	4.13915	3.48592e-05	0.0102045
ENSG00000267519	AC020916.1	novel_transcript	255.294	-0.895215	0.260553	-3.43583	0.000590747	0.0583829
ENSG00000268027	AC243960.1	novel_transcript,_sense_intronic_to_CEACAM21	202.986	-0.923569	0.248928	-3.71019	0.000207101	0.0302543
ENSG00000268471	MIR4453HG	MIR4453_host_gene	114.817	-1.04523	0.30644	-3.41088	0.000647525	0.0605439
ENSG00000270164	LINC01480	long_intergenic_non-protein_coding_RNA_1480	178.952	-1.22698	0.272266	-4.50655	6.58903e-06	0.00374627
ENSG00000270605	AL353622.1	novel_transcript	82.6466	-1.03754	0.303161	-3.42242	0.000620672	0.059884
ENSG00000271856	LINC01215	long_intergenic_non-protein_coding_RNA_1215	400.827	-0.653621	0.184684	-3.53913	0.000401441	0.0433819
ENSG00000272870	AC097534.2	?	259.886	-1.09562	0.240637	-4.55299	5.28899e-06	0.00339759
ENSG00000273284	AP001033.2	novel_transcript,_sense_intronic_to_ANKRD12	135.039	-0.943364	0.237816	-3.96679	7.28483e-05	0.0158933
ENSG00000274712	AC005332.4	novel_transcript	107.079	-1.03421	0.30664	-3.3727	0.000744337	0.0653239
ENSG00000275131	AC241952.1	?	205.131	-0.809541	0.208486	-3.88296	0.000103192	0.0197226
ENSG00000277511	AC116407.2	novel_transcript	60.9501	-1.38711	0.39028	-3.55414	0.000379214	0.0420731
ENSG00000279088	AC022400.7	TEC	223.916	-1.06093	0.272587	-3.89208	9.93892e-05	0.0193149
