# Supplementary material for: Mesenchymal Stromal Cell-Derived Small Extracellular Vesicles Modulate Apoptosis, TNF Alpha and Interferon Gamma Response Gene mRNA Expression in T Lymphocytes
Source: Int J Mol Sci. 2023 Sep 5;24(18):13689. doi: 10.3390/ijms241813689 (PMC10530670; doi:10.3390/ijms241813689)
Supplement: Supplementary file 1 [file ijms-24-13689-s001.zip › Table S2. IPA_canonical_pathways_BHpval.xls]

## Sheet: Sheet0
© 2000-2020 QIAGEN. All rights reserved.
Ingenuity Canonical Pathways	-log(B-H p-value)	Ratio	z-score	Molecules
Integrin Signaling	1.45	0.0469	0	ACTB,ACTG1,ARPC4,CAPN2,CTTN,ITGAE,ITGAV,PFN1,PLCG2,RHOQ
Caveolar-mediated Endocytosis Signaling	1.45	0.0822	#NUM!	ACTB,ACTG1,FLNA,FLOT2,ITGAE,ITGAV
Crosstalk between Dendritic Cells and Natural Killer Cells	1.45	0.0787	#NUM!	ACTB,ACTG1,CCR7,CD69,CD80,IL2,LTA
RhoA Signaling	1.4	0.0569	1.89	ACTB,ACTG1,ARPC4,CFL1,LPAR6,PFN1,SEPTIN9
Huntington's Disease Signaling	1.4	0.0422	#NUM!	CAPN2,CLTB,CREB5,CTSD,GNA15,GNG4,GPAA1,HSPA8,STX16,TP53
Clathrin-mediated Endocytosis Signaling	1.4	0.0466	#NUM!	ACTB,ACTG1,APOD,ARPC4,CLTB,CTTN,EPN1,F2R,HSPA8
Phagosome Maturation	1.4	0.053	#NUM!	CTSD,CTSH,CTSW,GPAA1,PRDX2,STX16,TUBA1B,TUBB
Regulation of Actin-based Motility by Rho	1.34	0.0638	1.342	ACTB,ARHGDIA,ARPC4,CFL1,PFN1,RHOQ
Remodeling of Epithelial Adherens Junctions	1.24	0.0735	#NUM!	ACTB,ACTG1,ARPC4,TUBA1B,TUBB
RhoGDI Signaling	1.22	0.0444	0	ACTB,ACTG1,ARHGDIA,ARPC4,CFL1,GNA15,GNG4,RHOQ
ILK Signaling	1.12	0.0421	-0.378	ACTB,ACTG1,CFL1,CREB5,FERMT2,FLNA,LIMS2,RHOQ
Epithelial Adherens Junction Signaling	1.1	0.0461	#NUM!	ACTB,ACTG1,ARPC4,EPN1,TCF7,TUBA1B,TUBB
Tec Kinase Signaling	0.955	0.0427	-0.447	ACTB,ACTG1,GNA15,GNG4,PLCG2,RHOQ,TNFRSF10B
Wnt/Ca+ pathway	0.928	0.0645	-2	CREB5,FZD4,NFATC4,PLCG2
Systemic Lupus Erythematosus In B Cell Signaling Pathway	0.928	0.0327	-1	IFIT2,IL2,INPP5F,LTA,MCL1,NFATC4,PIK3AP1,PLCG2,RASGRP3
Death Receptor Signaling	0.928	0.0549	-0.447	ACTB,ACTG1,PARP12,PARP15,TNFRSF10B
ATM Signaling	0.928	0.0515	1.342	ATM,CREB5,H2AX,TP53,TRIM28
B Cell Receptor Signaling	0.903	0.0378	0.378	CFL1,CREB5,EGR1,INPP5F,NFATC4,PIK3AP1,PLCG2
Signaling by Rho Family GTPases	0.812	0.0328	1.342	ACTB,ACTG1,ARPC4,CFL1,GNA15,GNG4,RHOQ,SEPTIN9
Actin Cytoskeleton Signaling	0.614	0.0321	0.816	ACTB,ACTG1,ARPC4,CFL1,F2R,FLNA,PFN1
Dendritic Cell Maturation	0.597	0.0328	-0.816	CCR7,CD80,CREB5,IL23A,LTA,PLCG2
p53 Signaling	0.547	0.0408	-1	ATM,TNFRSF10B,TP53,TP53INP1
Apoptosis Signaling	0.544	0.0404	1	CAPN2,MCL1,PLCG2,TP53
Gαq Signaling	0.502	0.0318	-1	GNA15,GNG4,NFATC4,PLCG2,RHOQ
AMPK Signaling	0.496	0.0283	-1.342	ACTB,CREB5,EEF2,FASN,PRKAB2,SLC2A1
iCOS-iCOSL Signaling in T Helper Cells	0.496	0.036	-1	CD80,IL2,IL2RA,NFATC4
CD28 Signaling in T Helper Cells	0.489	0.0333	-1	ARPC4,CD80,IL2,NFATC4
Sirtuin Signaling Pathway	0.466	0.0241	0.447	SLC25A6,SLC2A1,TOMM22,TP53,TRIM28,TUBA1B,UCP2
Role of NFAT in Regulation of the Immune Response	0.456	0.0276	-1	CD80,GNA15,GNG4,NFATC4,PLCG2
Ephrin Receptor Signaling	0.456	0.0278	1.342	ARPC4,CFL1,CREB5,GNA15,GNG4
Synaptogenesis Signaling Pathway	0.398	0.0224	-0.378	ARPC4,CFL1,CREB5,GPAA1,HSPA8,PLCG2,STX16
Osteoarthritis Pathway	0.38	0.0237	0	CREB5,FZD4,PRKAB2,SMAD5,TCF7
PKCθ Signaling in T Lymphocytes	0.378	0.0258	-2	CD80,IL2,NFATC4,PLCG2
Glioblastoma Multiforme Signaling	0.35	0.0242	-2	FZD4,PLCG2,RHOQ,TP53
Cardiac Hypertrophy Signaling	0.346	0.0208	-1	GNA15,GNG4,NFATC4,PLCG2,RHOQ
T Cell Exhaustion Signaling Pathway	0.346	0.0229	-1	CD80,NFATC4,PLCG2,TCF7
Phospholipase C Signaling	0.325	0.0195	-2	CREB5,GNG4,NFATC4,PLCG2,RHOQ
Protein Kinase A Signaling	0.325	0.0176	-2	CREB5,FLNA,GNG4,NFATC4,PLCG2,TCF7,UBASH3B
Senescence Pathway	0.319	0.0182	-1.342	ATM,CAPN2,NFATC4,SMAD5,TP53
Cardiac Hypertrophy Signaling (Enhanced)	0.319	0.0164	-0.707	FZD4,GNA15,IL2,IL2RA,INPP5F,LTA,NFATC4,PLCG2
Neuroinflammation Signaling Pathway	0.265	0.0167	-0.447	CD200,CD80,CREB5,NFATC4,PLCG2
Systemic Lupus Erythematosus In T Cell Signaling Pathway	0.218	0.015	-0.447	CD80,CREB5,IL2,IL23A,RHOQ
Hepatic Fibrosis Signaling Pathway	0.192	0.0136	0	CREB5,FZD4,PLCG2,RHOQ,TCF7
