# Supplementary material for: Mesenchymal Stromal Cell-Derived Small Extracellular Vesicles Modulate Apoptosis, TNF Alpha and Interferon Gamma Response Gene mRNA Expression in T Lymphocytes
Source: Int J Mol Sci. 2023 Sep 5;24(18):13689. doi: 10.3390/ijms241813689 (PMC10530670; doi:10.3390/ijms241813689)
Supplement: Supplementary file 1 [file ijms-24-13689-s001.zip › Table S3. IPA_molecular_functions_and_diseases_CATEGORIES_BHpval.xls]

## Sheet: Sheet0
© 2000-2020 QIAGEN. All rights reserved.
Category	B-H p-value	Molecules
Cellular Function and Maintenance	9.85E-05-4.68E-02	ACTB,ACTG1,AIM2,ARHGDIA,ATM,BAG6,BSG,CAPN2,CCR7,CD200,CD27,CD69,CD7,CD80,CEBPG,CFL1,CLEC2D,CTSD,CTTN,CXCL5,DDIT3,EEF2,EGR1,ENPP1,EPN1,F2R,FASN,FLNA,FURIN,GAS5,GRB10,HSPA8,IL2,IL23A,IL2RA,ITGAV,KCTD7,LSP1,LTA,MAF1,MCL1,MIF,MYADM,NFATC4,NUCB2,OGT,PDP2,PFN1,PLCG2,PRDX2,PRKAB2,RASGRP3,RHOQ,RUFY4,SEPTIN9,SLC16A3,SLC25A6,SLC2A1,SLC5A3,SLC9A3R1,TAGLN2,TAPBP,TCF7,TK1,TMPRSS3,TNFRSF10B,TNFRSF8,TOMM22,TP53…
Hematological System Development and Function	9.85E-05-4.68E-02	ACTB,ADAM9,AIM2,ARHGDIA,ATM,B3GNT5,BAG6,BSG,CCR7,CD200,CD27,CD69,CD7,CD80,CEBPG,CFL1,CLEC2D,CTSD,CTSH,CTTN,CXCL5,DDIT3,DGKH,DMTN,DOCK5,EEF2,EGR1,ENPP1,ENPP2,F2R,FASN,FLNA,FURIN,GNA15,H2AX,HEG1,HOXB9,HSPA8,IFRD1,IL2,IL23A,IL2RA,ITGAE,ITGAV,JAML,LSP1,LTA,MCL1,MIF,MT-CO1,MVP,MXD1,MYADM,MZB1,PDP2,PFN1,PIK3AP1,PLCG2,PPP1R9B,PRDX2,PRKAB2,RASGRP3,RFFL,RHOQ,SAMD9L,SEPTIN9,SLAMF7,SLC2A1,SLC7A11,SMAD5,TAGL…
Reproductive System Disease	9.76E-06-4.54E-02	ACOT7,ACTB,ACTG1,ADAM19,ADAM9,ADARB1,AHDC1,AIM2,AKNA,ALG10B,ALYREF,APOD,ARHGDIA,ARMCX4,ATM,B3GNT5,BAG6,BSG,BTAF1,C5orf24,CAPN12,CAPN2,CCR7,CD69,CD80,CDK2AP2,CEP152,CHIC1,CLEC2D,CLK1,CNDP1,CPEB1,CREB5,CRNDE,CTSD,CTSH,CTTN,CXCL5,DDIT3,DGKH,DOCK5,DPP9,EDA2R,EEF2,EGR1,ENPP1,ENPP2,EPN1,EZH1,F2R,FAM153A/FAM153B,FASN,FBXO22,FERMT2,FLNA,FNDC3A,FURIN,FZD4,GAS5,GBP3,GNA15,GPR63,GRB10,GTPBP2,H2AX,HEG1,HERC5…
Neurological Disease	9.2E-03-4.31E-02	ACTB,ACTG1,APOD,BAG6,BSG,CAPN2,CD164,CFL1,CLPP,CTSD,DDIT3,EEF2,EGR1,FASN,FURIN,FZD4,IL2,IL2RA,ITGAV,KCTD7,KIF1A,MIF,MT-CO1,MZT2B,NFATC4,OGT,OTOF,PARP15,PFN1,PLCG2,PPP1R9B,PRDX2,PRRC2A,SF3B4,SLC16A3,SLC25A6,SLC2A1,SLC7A11,SLC9A3R1,TDRD7,TMPRSS3,TP53,TRIM22,TUBA1B,TUBB,UCP2,ZNF721
Dermatological Diseases and Conditions	9.18E-03-4.31E-02	APOD,ARHGDIA,CCR7,CD27,CD7,CD80,CDK2AP2,CFL1,CXCL5,EGR1,FASN,GNA15,H2AX,HIC1,HSPA8,IFI44,IFI44L,IL2,IL23A,IL2RA,ITGAE,LTA,MCL1,MIF,SLAMF7,SRM,TCF7,TLE3,TNFRSF8,TP53,TRIM22,TUBB
Organismal Survival	9.07E-04-1.36E-02	ACTB,ACTG1,ADAM19,ADAM22,ADAM9,ADARB1,AIM2,AKNA,APOD,ARHGDIA,ATM,B3GNT5,BAG6,BSG,CAPN2,CD200,CEBPG,CFL1,CLK1,CREB5,CRNDE,CTSD,CTTN,CXCL5,DDIT3,DHRS3,ENPP2,EPN1,EZH1,F2R,FAH,FASN,FERMT2,FLNA,FURIN,GAS5,H2AX,HEXIM1,HIC1,HSD17B7,IFIT2,IGF2BP3,IL2,IL23A,IL2RA,ITGAV,KIF1A,KLF8,LIMS2,LIN7B,LPAR6,LTA,MAF1,MCL1,MIF,NFATC4,NORAD,PFN1,PIGT,PLCG2,PNN,PRKAB2,PVT1,RHEBL1,SEPTIN9,SLC25A37,SLC2A1,SLC5A3,SLC7A11…
DNA Replication, Recombination, and Repair	7.42E-03-2.9E-02	ATM,FASN,H2AX,TP53,TRIM28
Hepatic System Disease	6.96E-03-4.32E-02	ACOT7,ACTB,ACTG1,ADAL,ADAM19,ADAM9,ADARB1,ADTRP,AHDC1,AKNA,ALG10B,APOBEC3H,ARHGDIA,ATM,BAG6,BSG,BTAF1,C15orf39,C7orf50,CCR7,CD200,CEP152,CFHR4,CLEC2D,CLK1,CNDP1,COTL1,CREB5,CTSD,CTTN,CXCL5,DDIT3,DDX54,DNHD1,DPP9,EEF2,EGR1,ENPP1,ENPP2,F2R,FAH,FAM153CP,FASN,FBXO22,FLNA,FNBP4,FURIN,GAS5,GBP3,GPAA1,GRB10,HEG1,HIC1,HSPA8,HTATIP2,IFRD1,IGF2BP3,IL2,IL23A,IL2RA,INPP5F,ITGAV,KIF18B,KIF1A,LMOD3,LTA,MCL1,MI…
Humoral Immune Response	6.89E-04-4.31E-02	AIM2,ARHGDIA,ATM,B3GNT5,CCR7,CD27,CD69,CD80,CEBPG,CLEC2D,DDIT3,EGR1,H2AX,IL2,IL2RA,LTA,MIF,MZB1,PIK3AP1,PLCG2,RASGRP3,RHOQ,SLAMF7,SLC2A1,TK1,TP53,TP53INP1,UBASH3B
Cell Cycle	6.69E-03-4.68E-02	ATM,BSG,CAPN2,CEBPG,CEP152,CPEB1,DDIT3,EGR1,FASN,FLNA,GRB10,H2AX,IL2,MXD1,PFN1,PNN,SEPTIN9,SF3B4,SNHG1,TNFRSF10B,TNFRSF8,TP53,TP53INP1,TSC22D3,TUBB
Developmental Disorder	6.69E-03-4.31E-02	ACTB,ACTG1,ARHGDIA,ATM,B3GNT5,BSG,CAPN2,CCR7,CD69,CTSD,ENPP2,F2R,FASN,FURIN,HSD17B7,IL2,ITGAE,ITGAV,MCL1,NFATC4,PFN1,PIK3AP1,PLCG2,PNN,RFXAP,SMAD5,TAPBP,TK1,TP53
Hereditary Disorder	6.69E-03-4.31E-02	ACTB,ACTG1,ATM,MT-CO1,RFXAP,TAPBP,TP53,TRIM28
Molecular Transport	6.69E-03-3.88E-02	ARHGDIA,ATM,BSG,CD200,ENPP1,FLNA,FLOT2,GRB10,HSPA8,IL2,ITGAV,MAF1,MIF,MVP,MYADM,RHOQ,SAT1,SLC2A1,SLC5A3,SLC9A3R1,STX16,TP53,TRIM22,UCP2
Carbohydrate Metabolism	6.69E-03-3.67E-02	ATM,BSG,ENPP1,GRB10,IL2,MIF,MVP,OGT,PFN1,RHOQ,SLC16A3,SLC2A1,SLC5A3,STX16,TP53,ZBTB20
Small Molecule Biochemistry	6.69E-03-3.65E-02	ACOT7,ATM,B3GNT5,BSG,CD7,COTL1,EGR1,ENPP1,ENPP2,F2R,FAR1,FASN,GPAA1,GRB10,HACD1,HSD17B7,HSPA8,IL2,INPP5F,MAF1,MIF,MZB1,PITPNM1,PLCG2,PRDX2,PRKAB2,RHOQ,SAT1,SLC2A1,SLC5A3,SLC7A11,SLC9A3R1,SRM,STARD4,TP53,TRERF1,UCP2,ZBTB20
Connective Tissue Disorders	6.64E-07-4.31E-02	ACTB,ACTG1,ADAM9,ADARB1,AIM2,ATM,BAG6,CAPN2,CCR7,CD200,CD27,CD69,CD80,CDK2AP2,CEBPG,CTSW,CXCL5,DDIT3,DMTN,EEF2,ENPP2,FASN,FURIN,GAS5,GRB10,HERC5,HSPA8,IFI44,IFI44L,IFRD1,IL2,IL23A,IL2RA,L3MBTL4,LINC-PINT,LPAR6,LTA,MCL1,MIF,MT-CO1,PARP12,PDP2,PIGT,PLCG2,PRDX2,PRRC2A,RAB1B,RASGRP3,SAMD9L,SLAMF7,SLC7A11,TAPBP,TCF7,TLE3,TNFRSF10B,TP53,TRIM22,TRIM28,UBASH3B,ZNF331
Inflammatory Disease	6.64E-07-4.31E-02	ADAM9,ADARB1,AIM2,APEH,ATM,BAG6,BSG,CAPN2,CCR7,CD200,CD27,CD69,CD7,CD80,CDK2AP2,CEBPG,COTL1,CTSD,CTSW,CXCL5,DDIT3,DMTN,DNAJC18,EEF2,EGR1,ENPP2,FAH,FASN,FURIN,GAS5,GRB10,HERC5,HSPA8,IFI44,IFI44L,IFRD1,IL2,IL23A,IL2RA,L3MBTL4,LINC-PINT,LTA,MCL1,MIF,MT-CO1,PARP12,PDP2,PLCG2,PPP1R9B,PRDX2,PRRC2A,RAB1B,RASGRP3,SAMD9L,SAT1,SLAMF7,SLC7A11,TAPBP,TCF7,TK1,TLE3,TNFRSF10B,TNFRSF8,TP53,TP53INP1,TRIM22,TRIM28…
Skeletal and Muscular Disorders	6.64E-07-4.31E-02	ACTB,ACTG1,ADAM9,ADARB1,AIM2,APOD,ATM,BAG6,BSG,CAPN2,CCR7,CD200,CD27,CD69,CD80,CDK2AP2,CEBPG,CTSW,CXCL5,DDIT3,DMTN,EEF2,EGR1,ENPP2,FASN,FURIN,GAS5,GRB10,HERC5,HSPA8,IFI44,IFI44L,IFRD1,IL2,IL23A,IL2RA,ITGAV,L3MBTL4,LINC-PINT,LTA,MCL1,MIF,MT-CO1,PARP12,PDP2,PLCG2,PRDX2,PRRC2A,RAB1B,RASGRP3,SAMD9L,SLAMF7,SLC25A6,SLC7A11,TAPBP,TCF7,TLE3,TNFRSF10B,TP53,TRIM22,TRIM28,TUBA1B,UBASH3B,ZNF331
Infectious Diseases	6.2E-03-2.7E-02	ACTB,ADAL,ADARB1,ATM,BAG6,BSG,CCR7,CD164,CD200,CD27,CD69,CD80,CLK1,CLTB,CTSW,CXCL5,DDIT3,EGR1,EPN1,F2R,FASN,FLNA,FLOT2,FURIN,HERC5,IFI44,IFI44L,IFIT2,IL2,IL23A,IL2RA,ITGAV,LSP1,LTA,MIF,MVP,MX2,MXD1,OGT,PARP12,PLCG2,PRDX2,PVT1,RAB1B,RFFL,RHEBL1,RPLP0P2,SLC2A1,SLC9A3R1,TAGLN2,TNFRSF10B,TP53,TRERF1,TRIM22,TRIM56,TUBB
Cellular Development	5.48E-04-4.68E-02	ACTB,ADAM9,AIM2,ARHGDIA,ATM,B3GNT5,BSG,CCR7,CD27,CD69,CD80,CEBPG,CFL1,CRNDE,CTSD,CTTN,CXCL5,DDIT3,EEF2,EGR1,F2R,FASN,FLNA,FURIN,GAS5,GNA15,GNG4,H2AX,HEXIM1,HIC1,HOXB9,HSPA8,HTATIP2,IFRD1,IGF2BP3,IL2,IL23A,IL2RA,INPP5F,ITGAV,KIF1A,LSP1,LTA,MCL1,MIF,MVP,MXD1,MZB1,NFATC4,NUCB2,OGT,PA2G4,PDP2,PFN1,PIK3AP1,PLAG1,PLCG2,PNN,PPP1R9B,PRDX2,PVT1,RASGRP3,RFFL,RHOQ,SAMD9L,SAT1,SEPTIN9,SLAMF7,SLC16A3,SLC25A6,…
Cellular Growth and Proliferation	5.48E-04-4.68E-02	ACTB,ADAM9,AIM2,ARHGDIA,ATM,B3GNT5,BSG,CCR7,CD27,CD69,CD80,CEBPG,CFL1,CRNDE,CTSD,CTTN,CXCL5,DDIT3,EEF2,EGR1,F2R,FASN,FLNA,FURIN,GAS5,GNA15,GNG4,H2AX,HEXIM1,HIC1,HOXB9,HSPA8,HTATIP2,IFRD1,IGF2BP3,IL2,IL23A,IL2RA,INPP5F,ITGAV,KIF1A,LSP1,LTA,MCL1,MIF,MVP,MXD1,MZB1,NFATC4,NUCB2,OGT,PA2G4,PDP2,PFN1,PIK3AP1,PLAG1,PLCG2,PNN,PPP1R9B,PRDX2,PVT1,RASGRP3,RFFL,RHOQ,SAMD9L,SAT1,SEPTIN9,SLAMF7,SLC16A3,SLC25A6,…
Cancer	4.48E-10-4.71E-02	ACOT7,ACTB,ACTG1,ADAL,ADAM19,ADAM22,ADAM9,ADARB1,ADAT2,ADTRP,AHDC1,AIM2,AKNA,ALG10B,ALYREF,ANKRD49,APEH,APOBEC3H,APOD,ARHGDIA,ARMCX4,ARPC4,ATM,B3GNT5,BAG6,BSG,BTAF1,C15orf39,C5orf24,C7orf50,CAPN12,CAPN2,CCR7,CD200,CD27,CD69,CD7,CD80,CDK2AP2,CEBPG,CEP152,CFHR4,CFL1,CHIC1,CLEC2D,CLK1,CLPP,CLTB,CNDP1,COTL1,COX8A,CPEB1,CREB5,CRNDE,CTSD,CTSH,CTSW,CTTN,CXCL5,DDIT3,DDX54,DGKH,DHRS3,DMTN,DNAJC18,DNHD1,DO…
Organismal Injury and Abnormalities	4.48E-10-4.71E-02	ACOT7,ACTB,ACTG1,ADAL,ADAM19,ADAM22,ADAM9,ADARB1,ADAT2,ADTRP,AHDC1,AIM2,AKNA,ALG10B,ALYREF,ANKRD49,APEH,APOBEC3H,APOD,ARHGDIA,ARMCX4,ARPC4,ATM,B3GNT5,BAG6,BSG,BTAF1,C15orf39,C5orf24,C7orf50,CAPN12,CAPN2,CCR7,CD200,CD27,CD69,CD7,CD80,CDK2AP2,CEBPG,CEP152,CFHR4,CFL1,CHIC1,CLEC2D,CLK1,CLPP,CLTB,CNDP1,COTL1,COX8A,CPEB1,CREB5,CRNDE,CTSD,CTSH,CTSW,CTTN,CXCL5,DDIT3,DDX54,DGKH,DHRS3,DMTN,DNAJC18,DNHD1,DO…
Endocrine System Development and Function	4.31E-02-4.65E-02	CLPP,CREB5,EGR1,FASN,GRB10,MAF1,MIF,NUCB2,SAT1,ZBTB20
Cell Signaling	4.31E-02-4.31E-02	CTTN,DMTN,GPAA1,HSPA8,SLC2A1,SLC9A3R1,TAPBP,TP53,WDR19,XAF1
Protein Synthesis	4.27E-03-4.59E-02	ADAM19,ADAM9,AIM2,APEH,ARHGDIA,ATM,B3GNT5,BAG6,BSG,CAPN2,CCR7,CD200,CD69,CD80,CFL1,CNDP1,CTSD,CTSH,CTTN,DMTN,ENPP2,FBXO22,FLNA,FLOT2,FURIN,GPAA1,H2AX,HSPA8,IFIT2,IL2,IL2RA,ITGAV,KLHL15,LTA,MIF,MYADM,OGT,PFN1,PIK3AP1,RASGRP3,RFFL,SAMD9L,SLC2A1,SLC9A3R1,TAPBP,TP53,TRIM22,TRPC4AP,UFD1,WDR19,XAF1
Post-Translational Modification	4.27E-03-4.31E-02	ADAM19,ADAM9,APEH,BAG6,CAPN2,CFL1,CNDP1,CTSD,CTSH,CTTN,DMTN,FURIN,GPAA1,HSPA8,OGT,SLC2A1,SLC9A3R1,TAPBP,TP53,WDR19,XAF1
Protein Degradation	4.27E-03-4.14E-02	ADAM19,ADAM9,APEH,BAG6,CAPN2,CFL1,CNDP1,CTSD,CTSH,FBXO22,FLNA,FLOT2,FURIN,HSPA8,KLHL15,OGT,PFN1,RFFL,SAMD9L,TP53,TRPC4AP,UFD1
Gene Expression	4.14E-02-4.71E-02	ATM,CEBPG,DDIT3,EGR1,PFN1,TP53
Protein Trafficking	3.88E-02-3.88E-02	ARHGDIA,BSG,CD200,FLNA,FLOT2,IL2,ITGAV,MIF,MYADM,SLC9A3R1,TP53,TRIM22
Cell Death and Survival	3.69E-05-4.68E-02	ACTB,ADARB1,AIM2,APOD,ARHGDIA,ATM,BAG6,BSG,CAPN2,CCR7,CD164,CD200,CD27,CD69,CD7,CD80,CEBPG,CFL1,COX8A,CPEB1,CRNDE,CTSD,CTSH,CTTN,DDIT3,DMTN,DPP9,EDA2R,EEF2,EGR1,ENPP2,F2R,FAH,FASN,FLNA,FLOT2,FURIN,GAS5,GRB10,H2AX,HEXIM1,HIC1,HOXB9,HSD17B7,HSPA8,HTATIP2,IFIT2,IFRD1,IGF2BP3,IL2,IL23A,IL2RA,ITGAE,ITGAV,KIF1A,KLF8,LEPROT,LIMS2,LPAR6,LSP1,LTA,MCL1,MIF,MOB3A,MVP,MXD1,MZB1,NFATC4,OGT,PA2G4,PFN1,PIGT,PIK…
Free Radical Scavenging	3.65E-02-3.65E-02	ACTB,ARHGDIA,COX8A,CTTN,DDIT3,DOCK5,F2R,FLNA,IL2,PLCG2,PRDX2,SLC2A1,SLC9A3R1,TP53,UCP2
Cell-To-Cell Signaling and Interaction	3.53E-03-4.68E-02	ADAM9,ATM,BAG6,BSG,CCR7,CD200,CD27,CD69,CD7,CD80,CFL1,CLEC2D,CTSH,CTTN,CXCL5,DDIT3,DGKH,DMTN,EGR1,F2R,FERMT2,FLNA,FURIN,GAS5,GNA15,HEXIM1,IL2,IL23A,IL2RA,ITGAE,ITGAV,LSP1,LTA,MIF,MT-CO1,MYADM,NUCB2,OGT,PLCG2,PPP1R9B,PRDX2,PRKAB2,SLC7A11,TAPBP,TNFRSF10B,TNFRSF8,TP53,UBASH3B,UCP2
Endocrine System Disorders	3.4E-04-2.79E-02	ACOT7,ACTG1,ADAL,ADAM19,ADAM22,ADAM9,ADARB1,ADAT2,AHDC1,AIM2,AKNA,ALYREF,APOBEC3H,APOD,ARHGDIA,ARMCX4,ARPC4,ATM,BAG6,BSG,BTAF1,C15orf39,C7orf50,CAPN12,CAPN2,CCR7,CD200,CD27,CD7,CD80,CEP152,CFHR4,CFL1,CHIC1,CLEC2D,CLK1,CLPP,CLTB,CNDP1,COTL1,CREB5,CTSD,CTSH,CTSW,CTTN,DDIT3,DDX54,DGKH,DHRS3,DNAJC18,DNHD1,DOCK5,DPP9,EDA2R,EEF2,EGR1,ENPP1,ENPP2,EPN1,EZH1,F2R,FAH,FAM118A,FAM153A/FAM153B,FAM8A1,FAR1,FAS…
Tissue Development	3.1E-04-4.68E-02	ATM,B3GNT5,BSG,CCR7,CD200,CD27,CD69,CD80,CEBPG,CFL1,CXCL5,DDIT3,EEF2,EGR1,ENPP2,F2R,FASN,FLNA,FURIN,GNA15,HEG1,IFRD1,IL2,IL23A,IL2RA,LSP1,LTA,MCL1,MIF,MZB1,NFATC4,PDP2,PFN1,PIK3AP1,PLCG2,PRDX2,RASGRP3,RFFL,SAMD9L,SEPTIN9,SLC2A1,TAPBP,TCF7,TK1,TNFRSF10B,TNFRSF8,TP53,TSC22D3
Immune Cell Trafficking	3.1E-04-4.54E-02	ACTB,ADAM9,ADTRP,AIM2,ATM,BAG6,BSG,CCR7,CD200,CD27,CD69,CD7,CD80,CLEC2D,CTSH,CTTN,CXCL5,DDIT3,DOCK5,EGR1,ENPP2,F2R,FASN,FLNA,IL2,IL23A,IL2RA,ITGAE,ITGAV,JAML,LSP1,LTA,MIF,MT-CO1,MYADM,PA2G4,PFN1,PIK3AP1,PLCG2,PRDX2,SLC16A3,SLC7A11,TNFRSF10B,TNFRSF8,TP53,TSC22D3,UCP2
Metabolic Disease	3.12E-04-4.31E-02	ADARB1,AHDC1,AIM2,APOD,ATM,BAG6,CCR7,CD200,CD27,CD7,CD80,CLEC2D,CLPP,CREB5,CTSD,CTSH,CTSW,DDIT3,EEF2,EGR1,ENPP1,F2R,FAH,FASN,GRB10,IFI44,IFIT2,IL2,IL23A,IL2RA,ITGAE,ITGAV,JAML,LINC01619,LTA,MIF,MZB1,OGT,PDP2,PLCG2,PRDX2,PRKAB2,PRRC2A,RFXAP,SAMD9L,SLC7A11,TAPBP,TK1,TMPRSS3,TP53,TP53INP1,TSC22D3,TUBB,UCP2,XAF1,YBX3,ZBTB20
Lymphoid Tissue Structure and Development	3.01E-04-4.68E-02	AIM2,ARHGDIA,ATM,B3GNT5,BSG,CCR7,CD200,CD27,CD69,CD7,CD80,CEBPG,CTSD,CXCL5,DDIT3,EGR1,F2R,FASN,FLNA,FURIN,H2AX,HEG1,HOXB9,HSPA8,IFRD1,IL2,IL23A,IL2RA,ITGAE,ITGAV,LSP1,LTA,MCL1,MIF,MVP,MXD1,MZB1,PDP2,PIK3AP1,PLCG2,PRDX2,RASGRP3,RFFL,RHOQ,SAMD9L,SLAMF7,SLC2A1,TAPBP,TCF7,TK1,TNFRSF10B,TNFRSF8,TP53,TP53INP1,TSC22D3,UBASH3B
Tissue Morphology	3.01E-04-4.68E-02	ADAM9,AIM2,APOD,ARHGDIA,ATM,B3GNT5,BSG,CCR7,CD200,CD27,CD69,CD7,CD80,CFL1,CRNDE,CTSD,CTTN,DDIT3,DMTN,EGR1,ENPP1,ENPP2,EPN1,F2R,FAH,FLNA,FURIN,GAS5,H2AX,HEXIM1,HOXB9,HSD17B7,HTATIP2,IL2,IL23A,IL2RA,ITGAE,ITGAV,KLF8,LSP1,LTA,MAF1,MCL1,MIF,MXD1,MZB1,NFATC4,PFN1,PIK3AP1,PLCG2,PRDX2,PVT1,RASGRP3,RHOQ,SEPTIN9,SLC2A1,SMAD5,TAPBP,TK1,TNFRSF8,TP53,TRERF1,TSC22D3,UBASH3B
Organ Morphology	3.01E-04-4.31E-02	AIM2,APOD,ARHGDIA,ATM,B3GNT5,CCR7,CD200,CD7,CD80,CTSD,EGR1,F2R,FLNA,FURIN,HEXIM1,HOXB9,HSD17B7,IL2,IL2RA,LTA,MCL1,MIF,NFATC4,PRDX2,TK1,TNFRSF8,TP53,TSC22D3,UBASH3B
Hepatic System Development and Function	2E-02-2E-02	CCR7,CXCL5,DDIT3,EGR1,FAH,FASN,IL2,IL23A,IL2RA,LTA,PLCG2,SLC7A11,TK1,TNFRSF10B,TP53
Lipid Metabolism	2.52E-02-2.52E-02	ACOT7,B3GNT5,CD7,COTL1,EGR1,ENPP2,F2R,FAR1,FASN,GPAA1,GRB10,HACD1,HSD17B7,HSPA8,IL2,INPP5F,MIF,MZB1,PITPNM1,PLCG2,PRDX2,PRKAB2,RHOQ,SLC9A3R1,STARD4,TP53,TRERF1,ZBTB20
Cellular Movement	2.44E-05-4.59E-02	ACTB,ACTG1,ADAM19,ADAM9,ADARB1,ADTRP,AIM2,ARHGDIA,ATM,BSG,CAPN12,CAPN2,CCR7,CD200,CD69,CD80,CFL1,CPEB1,CRNDE,CTSD,CTSH,CTTN,CXCL5,DMTN,DOCK5,EGR1,ENPP1,ENPP2,EPN1,F2R,FASN,FERMT2,FLNA,FURIN,FZD4,GAS5,HEXIM1,HIC1,HOXB9,HSPA8,HTATIP2,IFIT2,IGF2BP3,IL2,IL23A,IL2RA,ITGAE,ITGAV,JAML,KIF1A,KLF8,LIMS2,LSP1,LTA,MCL1,MIF,MXD1,MYADM,NFATC4,NORAD,NUCB2,OGT,OTOF,PA2G4,PFN1,PLCG2,PPP1R9B,PRDX2,PVT1,RASGRP3,RF…
Cellular Assembly and Organization	2.41E-03-4.41E-02	ACTB,ACTG1,ARHGDIA,ARPC4,ATM,CAPN2,CCR7,CFL1,CLTB,CTTN,EPN1,F2R,FASN,FLNA,FZD4,H2AX,HSPA8,IL2,ITGAV,KIF1A,NFATC4,OTOF,PFN1,RHOQ,SEPTIN9,SLC7A11,SLC9A3R1,TP53,TUBB
Gastrointestinal Disease	2.16E-05-4.32E-02	ACOT7,ACTB,ACTG1,ADAL,ADAM19,ADAM22,ADAM9,ADARB1,ADTRP,AHDC1,AIM2,AKNA,ALG10B,ALYREF,ANKRD49,APEH,APOBEC3H,APOD,ARHGDIA,ARMCX4,ATM,B3GNT5,BAG6,BSG,BTAF1,C15orf39,C7orf50,CAPN12,CAPN2,CCR7,CD200,CD27,CD69,CD7,CD80,CEP152,CFHR4,CFL1,CHIC1,CLEC2D,CLK1,CLPP,CLTB,CNDP1,COTL1,CREB5,CRNDE,CTSD,CTSH,CTSW,CTTN,CXCL5,DDIT3,DDX54,DGKH,DNAJC18,DNHD1,DOCK5,DPP9,EDA2R,EEF2,EGR1,ENPP1,ENPP2,EPN1,EZH1,F2R,FAH,FA…
Cellular Compromise	2.09E-03-4.31E-02	APEH,ATM,BAG6,CD7,COTL1,CTSD,CTSH,CTSW,DMTN,DOCK5,EEF2,FLNA,GNA15,GTPBP2,H2AX,HSPA8,IL2,IL23A,ITGAV,MIF,MVP,PA2G4,PLCG2,SLC9A3R1,TAGLN2,TP53,TUBB,UBASH3B
Tumor Morphology	1.83E-03-4.68E-02	ADAM9,ATM,BSG,CAPN2,CCR7,CD80,CPEB1,CRNDE,CTTN,CXCL5,DDIT3,EGR1,ENPP2,F2R,FASN,FERMT2,FLNA,FURIN,H2AX,HEXIM1,HOXB9,HTATIP2,IL2,IL2RA,KLF8,LSP1,LTA,MIF,PRDX2,PVT1,SAT1,TNFRSF10B,TP53,TUBB
Renal and Urological Disease	1.83E-03-3.65E-02	ACOT7,ACTB,ADAL,ADAM19,ADAM22,ALYREF,APOD,ARHGDIA,ATM,BSG,BTAF1,CD80,CEP152,CNDP1,DMTN,DNHD1,EZH1,FAH,FERMT2,FLNA,FNBP4,FURIN,GAS5,GNG4,H2AX,HERC5,HSD17B7,IFI44,IGF2BP3,IL2,IL2RA,INPP5F,ITGAV,KLHL15,L3MBTL4,LINC-PINT,LPAR6,MCL1,MVP,MX2,MXD1,MYADM,MZT2B,NHSL2,OGT,PA2G4,PARP12,PIGT,PITPNM1,PLAG1,PLCG2,PNISR,PRDX2,PRRC2A,PVT1,RANBP6,RNF19A,RUFY4,SAMD9L,SLC2A1,SLC5A3,SLC7A11,SLC9A3R1,TP53,TRIM22,TUBB…
Immunological Disease	1.58E-07-4.31E-02	ACTG1,ADAM19,ADAM22,ADAM9,ADARB1,AIM2,ARHGDIA,ATM,B3GNT5,BAG6,CCR7,CD200,CD27,CD69,CD7,CD80,CEBPG,CFL1,CLEC2D,CLK1,CNDP1,CTSD,CTSH,CTSW,CTTN,CXCL5,DDIT3,DOCK5,EEF2,EGR1,ENPP1,F2R,FAM153A/FAM153B,FASN,FERMT2,FLNA,FURIN,GAS5,GNA15,GNG4,GRB10,GTPBP2,H2AX,HERC5,HIC1,HOXB9,HSPA8,IFI44,IFI44L,IFIT2,IFRD1,IL2,IL23A,IL2RA,ITGAE,ITGAV,JAML,L3MBTL4,LINC-PINT,LOC284454,LSP1,LTA,MCL1,MIF,MT-CO1,MXD1,MZB1,PAR…
Cell-mediated Immune Response	1.55E-03-4.68E-02	ACTB,ATM,BSG,CCR7,CD27,CD69,CD80,CXCL5,EGR1,ENPP2,FURIN,IL2,IL23A,IL2RA,ITGAE,ITGAV,LTA,MCL1,MIF,PDP2,PFN1,PRDX2,RASGRP3,SEPTIN9,SLC2A1,TAPBP,TCF7,TK1,TNFRSF8,TP53
Antimicrobial Response	1.53E-03-2.89E-02	AIM2,APOBEC3H,CCR7,CFL1,COTL1,FLNA,HSPA8,IFI44,IFI44L,IFIT2,IL23A,MX2,TP53,TRIM22,TRIM56
Cardiovascular System Development and Function	1.36E-02-4.52E-02	ADAM19,ADAM9,APOD,ARHGDIA,ATM,BSG,CAPN2,CCR7,CD69,CTSD,CTSH,CTTN,CXCL5,DDIT3,DHRS3,EGR1,ENPP1,ENPP2,EPN1,F2R,FASN,FERMT2,FLNA,FURIN,FZD4,GAS5,H2AX,HEG1,HEXIM1,HSD17B7,HTATIP2,IL2,IL23A,IL2RA,INPP5F,ITGAV,LIMS2,LPAR6,MCL1,MIF,NFATC4,OGT,PFN1,PRKAB2,SAT1,SEPTIN9,SMAD5,TP53
Auditory Disease	1.36E-02-3.39E-02	ACTB,ACTG1,CD164,CLPP,FZD4,MT-CO1,OTOF,SF3B4,SLC7A11,SLC9A3R1,TMPRSS3
Embryonic Development	1.29E-03-4.68E-02	ATM,B3GNT5,BSG,CAPN2,CCR7,CD27,CD69,CD80,CEBPG,CFL1,CXCL5,EGR1,ENPP2,F2R,FASN,FLNA,FURIN,H2AX,HEG1,HSD17B7,IGF2BP3,IL2,IL23A,IL2RA,ITGAV,LSP1,LTA,MCL1,MIF,MXD1,MZB1,NFATC4,OGT,PA2G4,PDP2,PFN1,PIK3AP1,PLCG2,PNN,PRDX2,RASGRP3,SAMD9L,SAT1,SLC2A1,SMAD5,TAPBP,TCF7,TK1,TNFRSF8,TP53,TP53INP1,TSC22D3
Hematopoiesis	1.29E-03-4.68E-02	ARHGDIA,ATM,BSG,CCR7,CD27,CD69,CD7,CD80,CEBPG,CTSD,CXCL5,DDIT3,DMTN,EEF2,EGR1,ENPP1,FASN,FLNA,FURIN,GNA15,IFRD1,IL2,IL23A,IL2RA,LSP1,LTA,MCL1,MIF,MXD1,MZB1,PDP2,PIK3AP1,PLCG2,PRDX2,RASGRP3,RFFL,SAMD9L,SLC2A1,SMAD5,TAPBP,TCF7,TK1,TNFRSF10B,TNFRSF8,TP53,TRIM28,TSC22D3
Organ Development	1.29E-03-4.68E-02	ATM,B3GNT5,BSG,CCR7,CD27,CD69,CD80,CEBPG,CXCL5,DDIT3,EGR1,FAH,FASN,FLNA,FURIN,HEG1,IL2,IL23A,IL2RA,LSP1,LTA,MCL1,MIF,MZB1,PDP2,PIK3AP1,PLCG2,PRDX2,RASGRP3,SAMD9L,SLC2A1,SLC7A11,TAPBP,TCF7,TK1,TNFRSF10B,TNFRSF8,TP53
Organismal Development	1.29E-03-4.68E-02	ADAM19,ADAM9,AIM2,ARHGDIA,ATM,B3GNT5,BAG6,BSG,CAPN2,CCR7,CD27,CD69,CD80,CEBPG,CFL1,CPEB1,CTSD,CXCL5,DDIT3,DHRS3,EGR1,ENPP2,EPN1,F2R,FAH,FASN,FERMT2,FLNA,FURIN,FZD4,GAS5,H2AX,HEG1,HEXIM1,HOXB9,HSD17B7,IFRD1,IL2,IL23A,IL2RA,INPP5F,ITGAV,LIMS2,LSP1,LTA,MCL1,MIF,MZB1,NFATC4,NUCB2,OGT,PDP2,PFN1,PIK3AP1,PLCG2,PRDX2,PRKAB2,RASGRP3,SAMD9L,SAT1,SEPTIN9,SLC2A1,SLC9A3R1,SMAD5,STARD4,TAPBP,TCF7,TK1,TNFRSF8,T…
Nervous System Development and Function	1.23E-02-4.14E-02	ACTB,ACTG1,ATM,CAPN2,CD200,CFL1,DDIT3,DGKH,EGR1,EPN1,F2R,HSPA8,KIF1A,NFATC4,OTOF,PFN1,TP53
Cardiovascular Disease	1.16E-02-3.6E-02	ADAM19,ADAM9,ARHGDIA,CAPN2,CCR7,CD69,CD80,CTSD,CTTN,DDIT3,DHRS3,DMTN,EGR1,ENPP1,ENPP2,EPN1,F2R,FASN,FLNA,FURIN,HEXIM1,HSD17B7,IL2,IL23A,IL2RA,INPP5F,ITGAV,LIMS2,LPAR6,LTA,MCL1,MIF,MT-CO1,NFATC4,PFN1,PIGT,PLCG2,PRDX2,SLC25A37,SLC2A1,SLC7A11,SMAD5,TK1,TLE3,TP53,TRIM28
Cell Morphology	1.14E-02-4.41E-02	ARHGDIA,ATM,B3GNT5,BAG6,CAPN2,CCR7,CD200,CD80,CFL1,CTSD,CTTN,CXCL5,DDIT3,DMTN,DOCK5,EEF2,EGR1,F2R,FASN,FERMT2,FLNA,GAS5,H2AX,HSPA8,IL2,IL2RA,ITGAV,LPAR6,LTA,MAF1,MCL1,MXD1,MYADM,NFATC4,PFN1,PIK3AP1,PLCG2,PRDX2,PRKAB2,RHOQ,RUFY4,SEPTIN9,SYNM,TNFRSF10B,TOMM22,TP53,TP53INP1,TRIM22,UBASH3B,UCP2,YOD1
Inflammatory Response	1.07E-04-4.54E-02	ACTB,ADAM9,AIM2,APEH,APOBEC3H,ARHGDIA,ATM,BAG6,BSG,CAPN2,CCR7,CD200,CD27,CD69,CD7,CD80,CDK2AP2,CEBPG,CFL1,CLEC2D,COTL1,CTSD,CTSH,CTSW,CTTN,CXCL5,DDIT3,DMTN,DOCK5,EEF2,EGR1,ENPP2,F2R,FAH,FAM153A/FAM153B,FASN,FLNA,FURIN,GAS5,GNA15,GRB10,GTPBP2,HERC5,HSD17B7,HSPA8,IFI44,IFI44L,IFIT2,IL2,IL23A,IL2RA,ITGAE,ITGAV,JAML,L3MBTL4,LINC-PINT,LSP1,LTA,MCL1,MIF,MT-CO1,MVP,MX2,MZB1,PA2G4,PARP12,PFN1,PIK3AP1,PLC…
Hematological Disease	1.03E-04-4.31E-02	ACTB,ACTG1,ADAL,ADAM19,ADAM22,ADAM9,AIM2,ALG10B,ATM,CAPN12,CAPN2,CCR7,CD200,CD27,CD69,CD7,CD80,CFL1,CLK1,CLTB,CNDP1,CTSH,CTSW,CTTN,DMTN,EGR1,ENPP1,ENPP2,F2R,FAR1,FASN,FERMT2,FLNA,GNG4,GTPBP2,H2AX,HIC1,HSPA8,IFI44,IFI44L,IFIT2,IGF2BP3,IL2,IL2RA,ITGAE,ITGAV,KIF1A,KLHL15,LOC284454,LPAR6,LTA,MCL1,MIF,MT-CO1,NFATC4,PIGT,PIK3AP1,PLAG1,PLCG2,PPFIBP1,PRDX2,PRR12,RANBP6,RAVER1,RUFY4,SAMD9L,SEPTIN9,SLAMF7,…
Digestive System Development and Function	1.01E-02-2E-02	CCR7,CXCL5,DDIT3,EGR1,FAH,FASN,IL2,IL23A,IL2RA,LTA,PLCG2,SLC7A11,TK1,TNFRSF10B,TP53
