# Supplementary material for: Mesenchymal Stromal Cell-Derived Small Extracellular Vesicles Modulate Apoptosis, TNF Alpha and Interferon Gamma Response Gene mRNA Expression in T Lymphocytes
Source: Int J Mol Sci. 2023 Sep 5;24(18):13689. doi: 10.3390/ijms241813689 (PMC10530670; doi:10.3390/ijms241813689)
Supplement: Supplementary file 1 [file ijms-24-13689-s001.zip › Table S4. IPA_molecular_functions_and_diseases.xls]

## Sheet: Sheet0
© 2000-2023 QIAGEN. All rights reserved.
Categories	Diseases or Functions Annotation	p-value	B-H p-value	Predicted Activation State	Activation z-score	Molecules	# Molecules
Infectious Diseases	Viral Infection	0.000132	0.0062	Increased	2.39	ACTB,ADAL,ADARB1,ATM,BAG6,BSG,CCR7,CD164,CD200,CD69,CD80,CLK1,CLTB,CTSW,CXCL5,DDIT3,EGR1,EPN1,F2R,FASN,FLNA,FLOT2,FURIN,HERC5,IFIT2,IL2,IL23A,IL2RA,ITGAV,LSP1,MIF,MVP,MX2,MXD1,NHERF1,OGT,PARP12,PLCG2,PRDX2,PVT1,RAB1B,RFFL,SLC2A1,TAGLN2,TNFRSF10B,TP53,TRERF1,TRIM22,TRIM56,TUBB	50
Carbohydrate Metabolism	Glycolysis of cells	0.0011	0.0257	Increased	2.134	BSG,IL2,MIF,OGT,PFN1,SLC16A3,SLC2A1,TP53,ZBTB20	9
Carbohydrate Metabolism,Cellular Function and Maintenance	Glycolysis of tumor cell lines	0.00217	0.0367		1.96	OGT,SLC16A3,SLC2A1,TP53	4
Cell Morphology,Cellular Assembly and Organization,Cellular Function and Maintenance	Formation of pseudopodia	0.00115	0.0259		1.934	CAPN2,CCR7,FASN,SEPTIN9	4
Metabolic Disease,Organismal Injury and Abnormalities	Glucose metabolism disorder	2.16e-06	0.000312		1.83	ADARB1,AHDC1,AIM2,APOD,ATM,BAG6,CCR7,CD200,CD27,CD7,CD80,CLEC2D,CLPP,CREB5,CTSD,CTSH,CTSW,DDIT3,EEF2,EGR1,ENPP1,F2R,FAH,FASN,GRB10,IFI44,IFIT2,IL2,IL23A,IL2RA,ITGAE,ITGAV,JAML,LINC01619,LTA,MIF,MZB1,OGT,PDP2,PLCG2,PRDX2,PRKAB2,PRRC2A,SAMD9L,SLC7A11,TMPRSS3,TP53,TP53INP1,TSC22D3,TUBB,UCP2,XAF1,YBX3,ZBTB20	54
Immunological Disease	Hypersensitive reaction	0.00298	0.0431		1.698	ATM,CCR7,CFL1,DOCK5,FAM153A/FAM153B,FLNA,GNA15,IL2RA,LTA,MCL1,MIF,SRM,TNFRSF8,TP53,TSC22D3,ZNF331	16
Cellular Movement	Migration of sarcoma cell lines	6.55e-05	0.00374		1.64	CAPN2,CTTN,FASN,FLNA,GAS5,NHERF1,SEPTIN9,TP53	8
Cancer	Cell transformation	0.00293	0.0431		1.541	ATM,CD7,EGR1,F2R,GRB10,HTATIP2,IL2,MIF,MXD1,PLCG2,RHOQ,SEPTIN9,TNFRSF8,TP53,TRPC4AP,TSC22D3	16
Endocrine System Disorders,Gastrointestinal Disease,Metabolic Disease,Organismal Injury and Abnormalities	Diabetes mellitus	0.000124	0.00586		1.453	AIM2,APOD,BAG6,CCR7,CD200,CD27,CD7,CD80,CLEC2D,CREB5,CTSD,CTSH,CTSW,EEF2,EGR1,ENPP1,F2R,FAH,FASN,IFI44,IFIT2,IL2,IL23A,IL2RA,ITGAE,ITGAV,JAML,LINC01619,LTA,MIF,MZB1,PDP2,PLCG2,PRRC2A,SAMD9L,SLC7A11,TMPRSS3,TP53,TUBB,UCP2,XAF1,YBX3	42
Hematological System Development and Function,Immune Cell Trafficking,Inflammatory Response,Tissue Development	Accumulation of phagocytes	0.00207	0.0365		1.431	CCR7,CD200,DDIT3,EGR1,F2R,MIF,PFN1,PIK3AP1	8
Hematological System Development and Function,Immune Cell Trafficking,Inflammatory Response,Tissue Development	Accumulation of leukocytes	2.06e-06	0.00031		1.391	CCR7,CD200,CD27,CD80,DDIT3,EGR1,ENPP2,F2R,IL2,IL23A,IL2RA,LTA,MIF,PFN1,PIK3AP1,TNFRSF8,TSC22D3	17
Cellular Function and Maintenance	Function of leukocytes	5.28e-07	0.000105		1.387	AIM2,ARHGDIA,ATM,CCR7,CD200,CD27,CD69,CD80,CEBPG,CLEC2D,EGR1,IL2,IL23A,IL2RA,LSP1,LTA,MCL1,MIF,PLCG2,SLC2A1,TAGLN2,TAPBP,TCF7,TP53,UCP2	25
DNA Replication, Recombination, and Repair	Non-homologous end joining	0.000171	0.00742		1.387	ATM,FASN,H2AX,TP53,TRIM28	5
Tissue Development	Accumulation of cells	4.58e-06	0.000548		1.372	CCR7,CD200,CD27,CD80,DDIT3,EGR1,ENPP2,F2R,IL2,IL23A,IL2RA,LTA,MIF,PFN1,PIK3AP1,SEPTIN9,TNFRSF8,TP53,TSC22D3	19
Cell Death and Survival	Cell survival	7.43e-05	0.00411		1.349	APOD,ATM,CAPN2,CCR7,CD200,CD27,CD7,CD80,CRNDE,CTSD,CTTN,DDIT3,DPP9,EEF2,EGR1,F2R,FASN,FLNA,GAS5,GRB10,H2AX,HIC1,HSPA8,HTATIP2,IGF2BP3,IL2,KIF1A,KLF8,LEPROT,LTA,MCL1,MIF,MVP,OGT,PLCG2,PRDX2,SAT1,SEPTIN9,SLC2A1,SYNM,TCF7,TNFRSF10B,TNFRSF8,TP53,TRIM28,TSC22D3,TUBB,UCP2,XAF1,ZBTB20	50
Cancer,Organismal Injury and Abnormalities	Non-hematological solid tumor	8.33e-13	1.41e-09		1.254	ACOT7,ACTB,ACTG1,ADAL,ADAM19,ADAM22,ADAM9,ADARB1,ADAT2,ADTRP,AHDC1,AIM2,AKNA,ALG10B,ALYREF,ANKRD49,APEH,APOBEC3H,APOD,ARHGDIA,ARMCX4,ARPC4,ATM,B3GNT5,BAG6,BSG,BTAF1,C15orf39,C5orf24,C7orf50,CAPN12,CAPN2,CCR7,CD200,CD27,CD69,CD7,CD80,CDK2AP2,CEBPG,CEP152,CFHR4,CFL1,CHIC1,CLEC2D,CLK1,CLPP,CLTB,CNDP1,COTL1,CREB5,CRNDE,CTSD,CTSH,CTSW,CTTN,CXCL5,DDIT3,DDX54,DGKH,DHRS3,DMTN,DNAJC18,DNHD1,DOCK5,DPP9,EDA…	261
Cell Death and Survival	Cell viability	0.000153	0.00678		1.17	APOD,ATM,CAPN2,CCR7,CD200,CD27,CD7,CD80,CRNDE,CTSD,CTTN,DDIT3,DPP9,EEF2,EGR1,F2R,FASN,FLNA,GAS5,H2AX,HIC1,HSPA8,HTATIP2,IGF2BP3,IL2,KIF1A,KLF8,LEPROT,LTA,MCL1,MIF,MVP,OGT,PLCG2,PRDX2,SAT1,SEPTIN9,SLC2A1,SYNM,TCF7,TNFRSF10B,TNFRSF8,TP53,TRIM28,TSC22D3,XAF1,ZBTB20	47
Cancer,Organismal Injury and Abnormalities	Nonhematologic malignant neoplasm	1.47e-12	2e-09		1.15	ACOT7,ACTB,ACTG1,ADAL,ADAM19,ADAM22,ADAM9,ADARB1,ADAT2,ADTRP,AHDC1,AIM2,AKNA,ALG10B,ALYREF,ANKRD49,APEH,APOBEC3H,APOD,ARHGDIA,ARMCX4,ARPC4,ATM,B3GNT5,BAG6,BSG,BTAF1,C15orf39,C5orf24,C7orf50,CAPN12,CAPN2,CCR7,CD200,CD27,CD69,CD7,CD80,CDK2AP2,CEBPG,CEP152,CFHR4,CFL1,CHIC1,CLEC2D,CLK1,CLPP,CLTB,CNDP1,COTL1,CREB5,CRNDE,CTSD,CTSH,CTSW,CTTN,CXCL5,DDIT3,DDX54,DGKH,DHRS3,DMTN,DNAJC18,DNHD1,DOCK5,DPP9,EDA…	260
Cell Death and Survival	Neuronal cell death	0.00154	0.03		1.138	ADARB1,ATM,BAG6,CD200,CD80,CTSD,DDIT3,EGR1,F2R,IL2,KIF1A,LTA,MCL1,MIF,MZB1,NFATC4,OGT,PIGT,PPP1R9B,PRDX2,RNF19A,SLC2A1,TP53,UCP2	24
Cellular Movement	Migration of fibrosarcoma cell lines	0.00297	0.0431		1.103	CTTN,FLNA,NHERF1,SEPTIN9	4
Cellular Function and Maintenance,Hematological System Development and Function	Function of lymphocytes	4.07e-07	9.85e-05		1.067	ARHGDIA,ATM,CCR7,CD27,CD69,CD80,CEBPG,CLEC2D,IL2,IL23A,IL2RA,LTA,MCL1,PLCG2,SLC2A1,TAGLN2,TAPBP,TCF7,TP53	19
Cell-To-Cell Signaling and Interaction,Cellular Movement	Recruitment of cells	0.00135	0.0289		1.055	CCR7,CD200,CD69,CXCL5,EGR1,HEXIM1,IL2,IL23A,IL2RA,ITGAE,LSP1,LTA,MIF,TNFRSF8,UCP2	15
Immunological Disease	Systemic autoimmune syndrome	3.49e-10	1.58e-07		1.046	ADAM9,ADARB1,AIM2,ATM,BAG6,CCR7,CD27,CD69,CD7,CD80,CEBPG,CLEC2D,CTSH,CTSW,CXCL5,EEF2,EGR1,FURIN,GAS5,GRB10,HERC5,HSPA8,IFI44,IFI44L,IFIT2,IFRD1,IL2,IL23A,IL2RA,ITGAE,JAML,L3MBTL4,LINC-PINT,LTA,MCL1,MIF,MT-CO1,MZB1,PARP12,PDP2,PRDX2,PRRC2A,RAB1B,RASGRP3,SAMD9L,SLAMF7,SLC7A11,TAPBP,TCF7,TLE3,TNFRSF10B,TP53,TRIM22,TRIM28,TUBB,UBASH3B,UCP2,XAF1,ZNF331	59
Cellular Movement	Cell movement of carcinoma cell lines	0.000691	0.019		1.02	BSG,CTSH,FASN,FERMT2,GAS5,HTATIP2,IFIT2,IGF2BP3,ITGAV,MIF,RFFL,TAGLN2,TP53	13
Lymphoid Tissue Structure and Development,Organ Morphology,Tissue Morphology	Quantity of red pulp	0.000592	0.0168		1	CD200,IL2,PRDX2,TP53	4
Cell Death and Survival	Cell death of endothelial cell lines	0.00175	0.0326		1	CTSD,F2R,MCL1,TNFRSF10B,TP53	5
Cell Morphology,Cellular Assembly and Organization,Cellular Function and Maintenance	Reorganization of actin cytoskeleton	0.00308	0.0441		1	ARHGDIA,CFL1,CTTN,FLNA,IL2,RHOQ,TP53	7
Hematological System Development and Function,Hematopoiesis,Humoral Immune Response,Lymphoid Tissue Structure and Development,Tissue Morphology	Quantity of pre-B lymphocytes	0.000618	0.0173		0.985	ARHGDIA,ATM,CD69,IL2,MZB1,PIK3AP1,PLCG2,TP53	8
Inflammatory Response	Immune response of cells	0.00031	0.0114		0.946	ATM,CCR7,CD200,CD27,CD69,CD80,CTSD,F2R,FLNA,FURIN,HSPA8,IL2,IL23A,IL2RA,ITGAV,MCL1,MIF,PFN1,RAB11FIP2,TAPBP,TP53,TRIM56,UCP2	23
Cell-To-Cell Signaling and Interaction,Hematological System Development and Function,Immune Cell Trafficking,Inflammatory Response	Activation of phagocytes	0.00177	0.0329		0.899	ADAM9,ATM,CCR7,CD200,CD80,CXCL5,DDIT3,IL2,IL23A,ITGAV,LTA,MIF,MT-CO1,TNFRSF10B,TP53	15
Inflammatory Disease	Chronic inflammatory disorder	3.65e-05	0.00241		0.873	ADAM9,AIM2,APEH,ATM,BAG6,BSG,CCR7,CD69,CD80,CEBPG,COTL1,CTSD,CXCL5,DDIT3,DNAJC18,EEF2,FURIN,GAS5,GRB10,HSPA8,IL2,IL23A,IL2RA,L3MBTL4,LTA,MCL1,MIF,PPP1R9B,PRDX2,PRRC2A,RAB1B,RASGRP3,SAMD9L,SLC7A11,TAPBP,TLE3,TNFRSF10B,TP53,TP53INP1,TRIM28,ZNF331	41
Cell-To-Cell Signaling and Interaction	Activation of cells	0.000226	0.00918		0.862	ADAM9,ATM,BAG6,CCR7,CD200,CD27,CD69,CD7,CD80,CFL1,CLEC2D,CTSH,CXCL5,DDIT3,DGKH,F2R,FERMT2,FLNA,GAS5,GNA15,IL2,IL23A,IL2RA,ITGAV,LSP1,LTA,MIF,MT-CO1,NUCB2,OGT,PLCG2,PPP1R9B,TNFRSF10B,TNFRSF8,TP53	35
Cell-To-Cell Signaling and Interaction,Cellular Movement,Hematological System Development and Function,Immune Cell Trafficking	Recruitment of leukocytes	0.00128	0.0279		0.859	CCR7,CD200,CD69,CXCL5,EGR1,IL2,IL23A,IL2RA,ITGAE,LSP1,LTA,MIF,TNFRSF8,UCP2	14
Cell-mediated Immune Response,Cellular Movement,Hematological System Development and Function,Immune Cell Trafficking	T cell migration	5.36e-05	0.00325		0.853	ACTB,BSG,CCR7,CD69,CD80,ENPP2,IL2,IL23A,IL2RA,ITGAE,ITGAV,LTA,MIF,PFN1,TNFRSF8	15
Cancer,Organismal Injury and Abnormalities	Tumorigenesis of epithelial neoplasm	4.19e-05	0.00268		0.843	ACOT7,ACTG1,ADAL,ADAM19,ADAM22,ADAM9,ADARB1,ADTRP,AHDC1,AIM2,AKNA,ALG10B,ANKRD49,APEH,APOD,ARHGDIA,ATM,BAG6,BSG,BTAF1,C5orf24,C7orf50,CAPN12,CAPN2,CD69,CD7,CEP152,CLEC2D,CLK1,CLPP,CLTB,CNDP1,CREB5,CRNDE,DDIT3,DDX54,DGKH,DMTN,DNHD1,DOCK5,DPP9,EEF2,EGR1,ENPP2,EPN1,EZH1,F2R,FAH,FAM153A/FAM153B,FAR1,FASN,FBXO22,FERMT2,FLNA,FNBP4,FNDC3A,GAS5,GBP3,GNA15,GNG4,GRB10,GTPBP2,H2AX,HEG1,HERC5,HOXB9,HSD17B7,H…	169
Cellular Movement	Invasion of squamous cell carcinoma cell lines	0.00175	0.0326		0.83	BSG,FURIN,IFIT2,ITGAV,TP53	5
Cellular Function and Maintenance	Function of blood cells	1.26e-06	0.000223		0.818	AIM2,ARHGDIA,ATM,CCR7,CD200,CD27,CD69,CD80,CEBPG,CLEC2D,EGR1,FLNA,IL2,IL23A,IL2RA,LSP1,LTA,MCL1,MIF,PLCG2,SLC2A1,TAGLN2,TAPBP,TCF7,TP53,UCP2	26
Infectious Diseases	Production of virus	0.000528	0.0155		0.816	ATM,HERC5,IL2,IL2RA,OGT,TP53,TRIM22	7
Cell Death and Survival	Cell viability of leukemia cell lines	0.00276	0.0427		0.816	ATM,CD200,HSPA8,MCL1,TNFRSF10B,TP53	6
Cell-To-Cell Signaling and Interaction,Hematological System Development and Function,Immune Cell Trafficking,Inflammatory Response	Activation of antigen presenting cells	0.000926	0.023		0.761	ATM,CCR7,CD200,CD80,CTSH,CXCL5,DDIT3,IL2,IL23A,ITGAV,LTA,MIF,TNFRSF10B,TP53	14
Cancer,Organismal Injury and Abnormalities	Abdominal neoplasm	1.53e-11	1.04e-08		0.76	ACOT7,ACTB,ACTG1,ADAL,ADAM19,ADAM22,ADAM9,ADARB1,ADTRP,AHDC1,AIM2,AKNA,ALG10B,ALYREF,ANKRD49,APEH,APOBEC3H,APOD,ARHGDIA,ARMCX4,ATM,B3GNT5,BAG6,BSG,BTAF1,C15orf39,C5orf24,C7orf50,CAPN12,CAPN2,CCR7,CD200,CD69,CD7,CD80,CDK2AP2,CEP152,CFHR4,CFL1,CHIC1,CLEC2D,CLK1,CLPP,CLTB,CNDP1,COTL1,CREB5,CRNDE,CTSD,CTSH,CTSW,CTTN,CXCL5,DDIT3,DDX54,DGKH,DMTN,DNAJC18,DNHD1,DOCK5,DPP9,EDA2R,EEF2,EGR1,ENPP1,ENPP2,EPN1…	248
Cancer,Organismal Injury and Abnormalities	Carcinoma	3.23e-12	2.74e-09		0.758	ACOT7,ACTB,ACTG1,ADAL,ADAM19,ADAM22,ADAM9,ADARB1,ADAT2,ADTRP,AHDC1,AIM2,AKNA,ALG10B,ALYREF,ANKRD49,APEH,APOBEC3H,APOD,ARHGDIA,ARMCX4,ARPC4,ATM,B3GNT5,BAG6,BSG,BTAF1,C15orf39,C5orf24,C7orf50,CAPN12,CAPN2,CCR7,CD200,CD27,CD69,CD7,CD80,CDK2AP2,CEP152,CFHR4,CFL1,CHIC1,CLEC2D,CLK1,CLPP,CLTB,CNDP1,COTL1,CREB5,CRNDE,CTSD,CTSH,CTSW,CTTN,CXCL5,DDIT3,DDX54,DGKH,DHRS3,DMTN,DNAJC18,DNHD1,DOCK5,DPP9,EDA2R,EEF…	257
Cell Death and Survival	Apoptosis of melanoma cell lines	0.000227	0.00918		0.747	ATM,DDIT3,EGR1,FASN,MCL1,SAT1,TNFRSF10B,TP53,XAF1	9
Cell-mediated Immune Response,Cellular Movement,Hematological System Development and Function,Immune Cell Trafficking	Cell movement of T lymphocytes	5.86e-05	0.00345		0.732	BSG,CCR7,CD69,CD80,ENPP2,IL2,IL23A,IL2RA,ITGAE,ITGAV,LTA,MIF,PFN1,TNFRSF8	14
Cell Death and Survival	Cell viability of stomach cancer cell lines	0.00135	0.0289		0.728	CRNDE,CTSD,CTTN,EGR1,HIC1,TP53	6
Cancer,Organismal Injury and Abnormalities	Genitourinary tumor	6.31e-11	3.56e-08		0.725	ACOT7,ACTB,ACTG1,ADAL,ADAM19,ADAM22,ADAM9,ADARB1,AHDC1,AIM2,AKNA,ALG10B,ALYREF,APOD,ARHGDIA,ARMCX4,ATM,B3GNT5,BAG6,BSG,BTAF1,C5orf24,CAPN12,CAPN2,CCR7,CD69,CD80,CDK2AP2,CEP152,CHIC1,CLEC2D,CLK1,CNDP1,CPEB1,CREB5,CRNDE,CTSD,CTSH,CTTN,DDIT3,DGKH,DMTN,DNHD1,DOCK5,DPP9,EDA2R,EEF2,EGR1,ENPP1,ENPP2,EPN1,EZH1,F2R,FAH,FAM153A/FAM153B,FASN,FBXO22,FERMT2,FLNA,FNBP4,FNDC3A,FURIN,FZD4,GAS5,GBP3,GNA15,GNG4,GP…	192
Cellular Movement	Migration of tumor cell lines	1.52e-06	0.000254		0.707	ADAM9,BSG,CAPN2,CCR7,CRNDE,CTSH,CTTN,CXCL5,DOCK5,EGR1,ENPP1,ENPP2,F2R,FASN,FLNA,FURIN,GAS5,HIC1,HTATIP2,IFIT2,IGF2BP3,IL2,ITGAV,MIF,MYADM,NFATC4,NHERF1,NORAD,PRDX2,PVT1,RFFL,SEPTIN9,SLC2A1,SMAD5,SOCS4,SYNM,TP53,TP53INP1	38
Cancer,Organismal Injury and Abnormalities	Tumorigenesis of tissue	3.06e-12	2.74e-09		0.693	ACOT7,ACTB,ACTG1,ADAL,ADAM19,ADAM22,ADAM9,ADARB1,ADAT2,ADTRP,AHDC1,AIM2,AKNA,ALG10B,ALYREF,ANKRD49,APEH,APOBEC3H,APOD,ARHGDIA,ARMCX4,ARPC4,ATM,B3GNT5,BAG6,BSG,BTAF1,C15orf39,C5orf24,C7orf50,CAPN12,CAPN2,CCR7,CD200,CD27,CD69,CD7,CD80,CDK2AP2,CEP152,CFHR4,CFL1,CHIC1,CLEC2D,CLK1,CLPP,CLTB,CNDP1,COTL1,CREB5,CRNDE,CTSD,CTSH,CTSW,CTTN,CXCL5,DDIT3,DDX54,DGKH,DHRS3,DMTN,DNAJC18,DNHD1,DOCK5,DPP9,EDA2R,EEF…	258
Cancer,Organismal Injury and Abnormalities	Frequency of tumor	7.54e-05	0.00412		0.687	ACOT7,ACTG1,ADAL,ADAM19,ADAM22,ADAM9,ADARB1,ADTRP,AHDC1,AIM2,AKNA,ALG10B,ANKRD49,APEH,APOD,ARHGDIA,ATM,BAG6,BSG,BTAF1,C5orf24,C7orf50,CAPN12,CAPN2,CD69,CD7,CEP152,CLEC2D,CLK1,CLPP,CLTB,CNDP1,CREB5,CRNDE,DDIT3,DDX54,DGKH,DMTN,DNHD1,DOCK5,DPP9,EEF2,EGR1,ENPP2,EPN1,EZH1,F2R,FAH,FAM153A/FAM153B,FAR1,FASN,FBXO22,FERMT2,FLNA,FNBP4,FNDC3A,GAS5,GBP3,GNA15,GNG4,GRB10,GTPBP2,H2AX,HEG1,HERC5,HEXIM1,HOXB9,HS…	170
Hematological System Development and Function,Lymphoid Tissue Structure and Development,Tissue Morphology	Quantity of regulatory T lymphocytes	0.00319	0.0452		0.681	CD27,CD80,IL2,IL2RA,LTA,MIF,TP53	7
Cell Death and Survival	Apoptosis of synovial cells	0.00255	0.0406		0.672	GAS5,MCL1,TNFRSF10B,TP53	4
Cellular Movement	Cell movement of stem cells	0.00329	0.0459		0.662	CFL1,IL2,MIF,PFN1,TP53	5
Cancer,Organismal Injury and Abnormalities,Reproductive System Disease	Mammary tumor	4.47e-08	1.52e-05		0.639	ADAM9,AHDC1,AIM2,ALYREF,APOD,ARHGDIA,ARMCX4,ATM,B3GNT5,BSG,CAPN2,CCR7,CD69,CD80,CDK2AP2,CLK1,CNDP1,CPEB1,CRNDE,CTSD,CTTN,EDA2R,EGR1,EZH1,F2R,FASN,FERMT2,FLNA,FURIN,GAS5,GNA15,H2AX,HERC5,HEXIM1,HIC1,HOXB9,HSD17B7,HTATIP2,IL2,IL23A,IL2RA,ITGAE,ITGAV,KLF8,KLHL15,KPNA5,LSP1,MCL1,MIF,NFATC4,NHERF1,NORAD,OTOF,PFN1,PIGT,PLPP5,PNISR,PRR12,RAVER1,SAMD9L,SEPTIN9,SF3B4,SLC25A6,SLC7A11,SPEF2,TAF1D,TAGLN2,TK1…	80
Cellular Movement	Migration of cells	8.28e-08	2.44e-05		0.638	ACTB,ADAM19,ADAM9,ADARB1,ADTRP,AIM2,ARHGDIA,ATM,BSG,CAPN2,CCR7,CD200,CD69,CD80,CFL1,CPEB1,CRNDE,CTSH,CTTN,CXCL5,DMTN,DOCK5,EGR1,ENPP1,ENPP2,F2R,FASN,FLNA,FURIN,FZD4,GAS5,HIC1,HOXB9,HSPA8,HTATIP2,IFIT2,IGF2BP3,IL2,IL23A,IL2RA,ITGAE,ITGAV,JAML,LIMS2,LSP1,LTA,MCL1,MIF,MXD1,MYADM,NFATC4,NHERF1,NORAD,NUCB2,PA2G4,PFN1,PLCG2,PPP1R9B,PRDX2,PVT1,RASGRP3,RFFL,SEPTIN9,SLC16A3,SLC2A1,SLC7A11,SMAD5,SOCS4,SYNM…	75
Hematological System Development and Function,Lymphoid Tissue Structure and Development,Tissue Morphology	Quantity of T lymphocytes	0.000313	0.0114		0.625	AIM2,ARHGDIA,ATM,CCR7,CD27,CD69,CD7,CD80,CTSD,DDIT3,H2AX,IL2,IL23A,IL2RA,ITGAE,ITGAV,LTA,MCL1,MIF,TAPBP,TNFRSF8,TP53	22
Cell Morphology,Cellular Assembly and Organization,Cellular Function and Maintenance	Reorganization of cytoskeleton	0.00283	0.0431		0.625	ARHGDIA,CFL1,CTTN,F2R,FLNA,IL2,ITGAV,RHOQ,TP53	9
Cellular Movement,Hematological System Development and Function,Immune Cell Trafficking	Cellular infiltration by lymphocytes	9.02e-05	0.00453		0.623	BSG,CCR7,CD80,IL2,IL23A,IL2RA,LTA,MIF,TNFRSF8,TP53,UCP2	11
Cell-To-Cell Signaling and Interaction,Hematological System Development and Function,Immune Cell Trafficking,Inflammatory Response	Activation of leukocytes	0.00323	0.0454		0.62	ADAM9,ATM,BAG6,CCR7,CD200,CD27,CD69,CD7,CD80,CLEC2D,CTSH,CXCL5,DDIT3,IL2,IL23A,IL2RA,ITGAV,LTA,MIF,MT-CO1,PLCG2,TNFRSF10B,TP53	23
Gene Expression	Transcription of mRNA	0.00347	0.0471		0.6	ATM,DDIT3,EGR1,PFN1,TP53	5
Cancer,Organismal Injury and Abnormalities	Incidence of tumor	6.23e-06	0.000704		0.591	ACOT7,ACTG1,ADAL,ADAM19,ADAM22,ADAM9,ADARB1,ADTRP,AHDC1,AIM2,AKNA,ALG10B,ALYREF,ANKRD49,APEH,APOD,ARHGDIA,ATM,BAG6,BSG,BTAF1,C5orf24,C7orf50,CAPN12,CAPN2,CD69,CD7,CD80,CEP152,CLEC2D,CLK1,CLPP,CLTB,CNDP1,CREB5,CRNDE,CTSH,DDIT3,DDX54,DGKH,DMTN,DNHD1,DOCK5,DPP9,EEF2,EGR1,ENPP1,ENPP2,EPN1,EZH1,F2R,FAH,FAM153A/FAM153B,FAR1,FASN,FBXO22,FERMT2,FLNA,FNBP4,FNDC3A,GAS5,GBP3,GNA15,GNG4,GRB10,GTPBP2,H2AX,HEG…	179
Cancer,Gastrointestinal Disease,Hepatic System Disease,Organismal Injury and Abnormalities	Liver tumor	0.00151	0.0298		0.582	ACOT7,ACTB,ACTG1,ADAL,ADAM19,ADAM9,ADARB1,ADTRP,AHDC1,AKNA,ALG10B,APOBEC3H,ARHGDIA,ATM,BAG6,BSG,BTAF1,C7orf50,CD200,CEP152,CFHR4,CLEC2D,CLK1,CNDP1,COTL1,CREB5,CTSD,CTTN,DDIT3,DDX54,DNHD1,DPP9,EEF2,ENPP1,ENPP2,FAH,FAM153CP,FASN,FBXO22,FLNA,FNBP4,FURIN,GAS5,GBP3,GPAA1,GRB10,HEG1,HIC1,HSPA8,HTATIP2,IFRD1,IGF2BP3,IL2,IL2RA,INPP5F,KIF18B,KIF1A,LTA,MCL1,MTX3,MVP,MX2,MYADM,MZT2B,NCALD,NUCB2,ODF2L,OGT,OT…	118
Cell Death and Survival	Cell death of hematopoietic cell lines	0.00316	0.045		0.56	CD27,CD69,DDIT3,IL2,MCL1,MZB1,SLC2A1,TP53,TSC22D3,TUBB	10
Cancer,Gastrointestinal Disease,Hepatic System Disease,Organismal Injury and Abnormalities	Hepatobiliary system cancer	0.00301	0.0432		0.555	ACOT7,ACTB,ACTG1,ADAL,ADAM19,ADAM9,ADARB1,ADTRP,AHDC1,AKNA,APOBEC3H,ARHGDIA,ATM,BAG6,BSG,BTAF1,C15orf39,C7orf50,CD200,CEP152,CFHR4,CLEC2D,CLK1,CNDP1,COTL1,CREB5,CTSD,CTTN,CXCL5,DDIT3,DNHD1,DPP9,EEF2,ENPP1,ENPP2,FAH,FASN,FLNA,FNBP4,GAS5,GBP3,GPAA1,GRB10,HEG1,HIC1,HSPA8,HTATIP2,IFRD1,IGF2BP3,IL2,IL2RA,INPP5F,KIF18B,KIF1A,LMOD3,LTA,MCL1,MTX3,MVP,MX2,MYADM,NCALD,NUCB2,ODF2L,OGT,OTOF,PA2G4,PAN2,PARP15…	107
Lymphoid Tissue Structure and Development,Organ Morphology,Tissue Morphology	Quantity of spleen	8.42e-05	0.00433		0.549	ATM,B3GNT5,CD200,IL2,LTA,PRDX2,TP53,UBASH3B	8
Cell-To-Cell Signaling and Interaction,Hematological System Development and Function	Activation of blood cells	0.000298	0.0112		0.522	ADAM9,ATM,BAG6,CCR7,CD200,CD27,CD69,CD7,CD80,CLEC2D,CTSH,CXCL5,DDIT3,DGKH,F2R,FLNA,GNA15,IL2,IL23A,IL2RA,ITGAV,LTA,MIF,MT-CO1,PLCG2,PPP1R9B,TNFRSF10B,TP53	28
Cell-mediated Immune Response,Cellular Movement,Hematological System Development and Function,Immune Cell Trafficking	Infiltration by T lymphocytes	0.00052	0.0153		0.518	BSG,CD80,IL2,IL23A,IL2RA,LTA,MIF,TNFRSF8	8
Cell-mediated Immune Response,Cellular Development,Cellular Function and Maintenance,Cellular Growth and Proliferation,Embryonic Development,Hematological System Development and Function,Hematopoiesis,Lymphoid Tissue Structure and Development,Organ Development,Organismal Development,Tissue Development	T cell development	3.62e-05	0.00241		0.514	ATM,BSG,CCR7,CD27,CD69,CD80,CXCL5,EGR1,FURIN,IL2,IL23A,IL2RA,LTA,MCL1,MIF,PDP2,PRDX2,RASGRP3,SLC2A1,TAPBP,TCF7,TK1,TNFRSF8,TP53	24
Cell-mediated Immune Response,Cellular Function and Maintenance,Hematological System Development and Function	T cell homeostasis	1.83e-05	0.00155		0.513	ATM,BSG,CCR7,CD27,CD69,CD80,CXCL5,EGR1,FURIN,IL2,IL23A,IL2RA,LTA,MCL1,MIF,PDP2,PRDX2,RASGRP3,SEPTIN9,SLC2A1,TAPBP,TCF7,TK1,TNFRSF8,TP53	25
Organismal Survival	Lifespan of organism	0.000427	0.0136		0.493	ATM,HEXIM1,IL2,IL2RA,KLF8,MAF1,MIF,TP53,ZBTB20	9
Cellular Movement,Hematological System Development and Function,Immune Cell Trafficking	Lymphocyte migration	0.000518	0.0153		0.492	ACTB,BSG,CCR7,CD69,CD80,ENPP2,IL2,IL23A,IL2RA,ITGAE,ITGAV,LTA,MIF,MYADM,PFN1,TNFRSF8	16
Cell Death and Survival	Cell death of hepatoma cell lines	0.00342	0.0468		0.489	BSG,DDIT3,GRB10,HTATIP2,IL2,MCL1,SLC7A11,TNFRSF10B,TP53	9
Cellular Development,Cellular Growth and Proliferation,Hematological System Development and Function,Humoral Immune Response,Lymphoid Tissue Structure and Development	Proliferation of B lymphocytes	0.0014	0.029		0.475	ARHGDIA,ATM,B3GNT5,CD80,IL2,LTA,MIF,PIK3AP1,PLCG2,RHOQ,SLAMF7,TP53,TP53INP1	13
Cancer,Organismal Injury and Abnormalities	Abdominal carcinoma	6e-12	4.52e-09		0.472	ACOT7,ACTB,ACTG1,ADAL,ADAM19,ADAM22,ADAM9,ADARB1,ADTRP,AHDC1,AIM2,AKNA,ALG10B,ANKRD49,APEH,APOBEC3H,APOD,ARHGDIA,ARMCX4,ATM,B3GNT5,BAG6,BSG,BTAF1,C15orf39,C5orf24,C7orf50,CAPN12,CAPN2,CCR7,CD200,CD69,CD7,CD80,CDK2AP2,CEP152,CFHR4,CFL1,CHIC1,CLEC2D,CLK1,CLPP,CLTB,CNDP1,COTL1,CREB5,CRNDE,CTSD,CTSH,CTSW,CTTN,CXCL5,DDIT3,DDX54,DGKH,DMTN,DNAJC18,DNHD1,DOCK5,DPP9,EDA2R,EEF2,EGR1,ENPP1,ENPP2,EPN1,EZH1,F…	241
Humoral Immune Response,Protein Synthesis	Quantity of IgG2b	0.00296	0.0431		0.447	ATM,B3GNT5,IL2,IL2RA,PIK3AP1	5
Cellular Movement	Invasion of breast cancer cell lines	0.00154	0.03		0.447	BSG,CCR7,CTTN,CXCL5,F2R,FURIN,HEXIM1,HIC1,KLF8,NFATC4,NHERF1,SEPTIN9,SMAD5,TP53	14
Cellular Movement	Cell movement of tumor cell lines	4.47e-07	0.000103		0.44	ADAM9,BSG,CAPN2,CCR7,CD69,CRNDE,CTSH,CTTN,CXCL5,DOCK5,EGR1,ENPP1,ENPP2,F2R,FASN,FERMT2,FLNA,FURIN,GAS5,HIC1,HTATIP2,IFIT2,IGF2BP3,IL2,ITGAV,MIF,MYADM,NFATC4,NHERF1,NORAD,PA2G4,PFN1,PRDX2,PVT1,RFFL,SEPTIN9,SLC2A1,SMAD5,SOCS4,SYNM,TAGLN2,TNFRSF8,TP53,TP53INP1	44
Cancer,Organismal Injury and Abnormalities	Development of carcinoma	7.46e-05	0.00411		0.409	ACOT7,ACTG1,ADAL,ADAM19,ADAM22,ADAM9,ADARB1,AHDC1,AIM2,AKNA,ALG10B,ANKRD49,APEH,APOD,ARHGDIA,ATM,BAG6,BSG,BTAF1,C5orf24,C7orf50,CAPN12,CAPN2,CD69,CD7,CEP152,CLEC2D,CLK1,CLPP,CLTB,CNDP1,CREB5,CRNDE,DDIT3,DDX54,DGKH,DMTN,DNHD1,DOCK5,DPP9,EEF2,EGR1,ENPP2,EPN1,EZH1,F2R,FAH,FAM153A/FAM153B,FAR1,FASN,FBXO22,FERMT2,FLNA,FNBP4,FNDC3A,GAS5,GBP3,GNA15,GNG4,GRB10,GTPBP2,H2AX,HEG1,HERC5,HOXB9,HSD17B7,HSPA8,H…	166
Cellular Movement,Hematological System Development and Function,Immune Cell Trafficking,Inflammatory Response	Cell movement of phagocytes	0.00235	0.0388		0.403	AIM2,BSG,CCR7,CD69,CD80,CTTN,CXCL5,DOCK5,F2R,FLNA,IL2,IL23A,IL2RA,ITGAV,JAML,LSP1,LTA,MIF,PFN1,PLCG2,TP53	21
Endocrine System Disorders,Gastrointestinal Disease,Inflammatory Disease,Inflammatory Response,Organismal Injury and Abnormalities	Inflammation of pancreas	0.000268	0.0103		0.401	CD80,COTL1,CTSD,DDIT3,IL2,LTA,MIF,PRDX2,SAT1,TP53INP1	10
Cell Death and Survival	Apoptosis of squamous cell carcinoma cell lines	0.000101	0.00497		0.4	CTTN,DDIT3,FASN,ITGAV,MCL1,TNFRSF10B,TP53	7
Cancer,Organismal Injury and Abnormalities	Abdominal cancer	1e-10	5.22e-08		0.383	ACOT7,ACTB,ACTG1,ADAL,ADAM19,ADAM22,ADAM9,ADARB1,ADTRP,AHDC1,AIM2,AKNA,ALG10B,ANKRD49,APEH,APOBEC3H,APOD,ARHGDIA,ARMCX4,ATM,B3GNT5,BAG6,BSG,BTAF1,C15orf39,C5orf24,C7orf50,CAPN12,CAPN2,CCR7,CD200,CD69,CD7,CD80,CDK2AP2,CEP152,CFHR4,CFL1,CHIC1,CLEC2D,CLK1,CLPP,CLTB,CNDP1,COTL1,CREB5,CRNDE,CTSD,CTSH,CTSW,CTTN,CXCL5,DDIT3,DDX54,DGKH,DMTN,DNAJC18,DNHD1,DOCK5,DPP9,EDA2R,EEF2,EGR1,ENPP1,ENPP2,EPN1,EZH1,F…	244
Humoral Immune Response,Protein Synthesis	Quantity of immunoglobulin	0.00245	0.0398		0.382	AIM2,ATM,B3GNT5,CCR7,CD69,CD80,H2AX,IL2,IL2RA,LTA,PIK3AP1,RASGRP3	12
Hematological System Development and Function,Immune Cell Trafficking,Inflammatory Response,Tissue Development	Accumulation of lymphocytes	5.72e-05	0.0034		0.379	CCR7,CD27,CD80,ENPP2,IL2,IL23A,IL2RA,LTA,TNFRSF8,TSC22D3	10
Cell Death and Survival	Cell death of hematopoietic cells	0.00168	0.0319		0.37	ATM,EGR1,IL2,LTA,MCL1,MXD1,PFN1,PLCG2,TP53,TRIM28,TSC22D3	11
Hematological System Development and Function,Immune Cell Trafficking,Inflammatory Response,Tissue Development	Accumulation of mononuclear leukocytes	4.22e-06	0.00053		0.356	CCR7,CD27,CD80,DDIT3,ENPP2,IL2,IL23A,IL2RA,LTA,PIK3AP1,TNFRSF8,TSC22D3	12
Cellular Movement,Hematological System Development and Function,Immune Cell Trafficking	Cell movement of lymphocytes	0.000346	0.0119		0.351	ACTB,BSG,CCR7,CD69,CD80,ENPP2,IL2,IL23A,IL2RA,ITGAE,ITGAV,LTA,MIF,MYADM,PFN1,TNFRSF8,TP53,UCP2	18
Cancer,Organismal Injury and Abnormalities	Non-melanoma solid tumor	1.91e-12	2.16e-09		0.33	ACOT7,ACTB,ACTG1,ADAL,ADAM19,ADAM22,ADAM9,ADARB1,ADAT2,ADTRP,AHDC1,AIM2,AKNA,ALG10B,ALYREF,ANKRD49,APEH,APOBEC3H,APOD,ARHGDIA,ARMCX4,ARPC4,ATM,B3GNT5,BAG6,BSG,BTAF1,C15orf39,C5orf24,C7orf50,CAPN12,CAPN2,CCR7,CD200,CD27,CD69,CD7,CD80,CDK2AP2,CEBPG,CEP152,CFHR4,CFL1,CHIC1,CLEC2D,CLK1,CLPP,CLTB,CNDP1,COTL1,CREB5,CRNDE,CTSD,CTSH,CTSW,CTTN,CXCL5,DDIT3,DDX54,DGKH,DHRS3,DMTN,DNAJC18,DNHD1,DOCK5,DPP9,EDA…	259
Humoral Immune Response,Protein Synthesis	Production of antibody	0.00143	0.029		0.326	AIM2,ATM,B3GNT5,CCR7,CD69,CD80,H2AX,IL2,IL2RA,LTA,MIF,PIK3AP1,RASGRP3	13
Gastrointestinal Disease,Hepatic System Disease,Organismal Injury and Abnormalities	Liver lesion	0.000158	0.00696		0.315	ACOT7,ACTB,ACTG1,ADAL,ADAM19,ADAM9,ADARB1,ADTRP,AHDC1,AKNA,ALG10B,APOBEC3H,ARHGDIA,ATM,BAG6,BSG,BTAF1,C7orf50,CCR7,CD200,CEP152,CFHR4,CLEC2D,CLK1,CNDP1,COTL1,CREB5,CTSD,CTTN,CXCL5,DDIT3,DDX54,DNHD1,DPP9,EEF2,EGR1,ENPP1,ENPP2,F2R,FAH,FAM153CP,FASN,FBXO22,FLNA,FNBP4,FURIN,GAS5,GBP3,GPAA1,GRB10,HEG1,HIC1,HSPA8,HTATIP2,IFRD1,IGF2BP3,IL2,IL23A,IL2RA,INPP5F,ITGAV,KIF18B,KIF1A,LTA,MCL1,MIF,MTX3,MVP,MX2,…	127
Cancer,Gastrointestinal Disease,Hepatic System Disease,Organismal Injury and Abnormalities	Liver cancer	0.00135	0.0289		0.314	ACOT7,ACTB,ACTG1,ADAL,ADAM19,ADAM9,ADARB1,ADTRP,AHDC1,AKNA,APOBEC3H,ARHGDIA,ATM,BAG6,BSG,BTAF1,C7orf50,CD200,CEP152,CFHR4,CLEC2D,CLK1,CNDP1,COTL1,CREB5,CTSD,CTTN,DDIT3,DNHD1,DPP9,EEF2,ENPP1,ENPP2,FAH,FASN,FLNA,FNBP4,GAS5,GBP3,GPAA1,GRB10,HEG1,HIC1,HSPA8,HTATIP2,IFRD1,IGF2BP3,IL2,IL2RA,INPP5F,KIF18B,KIF1A,LTA,MCL1,MTX3,MVP,MX2,MYADM,NCALD,NUCB2,ODF2L,OGT,OTOF,PA2G4,PAN2,PARP15,PFN1,PIK3AP1,PITPNM1…	104
Embryonic Development,Hematological System Development and Function,Lymphoid Tissue Structure and Development,Organ Development,Organismal Development,Tissue Development	Formation of lymphoid organ	0.000211	0.00874		0.313	ATM,B3GNT5,CCR7,CD80,EGR1,FLNA,IL2,LTA,PRDX2,RASGRP3,SAMD9L,TCF7,TK1,TP53	14
Cellular Movement,Immune Cell Trafficking	Migration of lymphatic system cells	0.000316	0.0114		0.29	ACTB,BSG,CCR7,CD69,CD80,ENPP2,IL2,IL23A,IL2RA,ITGAE,ITGAV,LTA,MIF,MYADM,PFN1,PLCG2,TNFRSF8	17
Cancer,Gastrointestinal Disease,Organismal Injury and Abnormalities	Digestive organ tumor	7e-08	2.16e-05		0.271	ACOT7,ACTB,ACTG1,ADAL,ADAM19,ADAM22,ADAM9,ADARB1,ADTRP,AHDC1,AIM2,AKNA,ALG10B,ALYREF,ANKRD49,APEH,APOBEC3H,APOD,ARHGDIA,ARMCX4,ATM,B3GNT5,BAG6,BSG,BTAF1,C15orf39,C7orf50,CAPN12,CAPN2,CCR7,CD200,CD69,CD7,CEP152,CFHR4,CFL1,CHIC1,CLEC2D,CLK1,CLPP,CLTB,CNDP1,COTL1,CREB5,CRNDE,CTSD,CTSH,CTSW,CTTN,CXCL5,DDIT3,DDX54,DGKH,DNAJC18,DNHD1,DOCK5,DPP9,EDA2R,EEF2,EGR1,ENPP1,ENPP2,EPN1,EZH1,F2R,FAH,FAM153CP,FAR…	230
Cancer,Organismal Injury and Abnormalities	Development of malignant tumor	0.000107	0.00517		0.249	ACOT7,ACTG1,ADAL,ADAM19,ADAM22,ADAM9,ADARB1,AHDC1,AIM2,AKNA,ALG10B,ANKRD49,APEH,APOD,ARHGDIA,ATM,BAG6,BSG,BTAF1,C5orf24,C7orf50,CAPN12,CAPN2,CD69,CD7,CEP152,CLEC2D,CLK1,CLPP,CLTB,CNDP1,CREB5,CRNDE,DDIT3,DDX54,DGKH,DMTN,DNHD1,DOCK5,DPP9,EEF2,EGR1,ENPP2,EPN1,EZH1,F2R,FAH,FAM153A/FAM153B,FAR1,FASN,FBXO22,FERMT2,FLNA,FNBP4,FNDC3A,GAS5,GBP3,GNA15,GNG4,GRB10,GTPBP2,H2AX,HEG1,HERC5,HOXB9,HSD17B7,HSPA8,H…	167
Hematological System Development and Function,Lymphoid Tissue Structure and Development,Tissue Morphology	Quantity of memory T lymphocytes	0.00312	0.0446		0.235	CD27,IL2,IL2RA,LTA,TP53	5
Connective Tissue Disorders,Inflammatory Disease,Organismal Injury and Abnormalities,Skeletal and Muscular Disorders	Rheumatic Disease	1.57e-09	6.64e-07		0.235	ADAM9,ADARB1,AIM2,ATM,BAG6,CAPN2,CCR7,CD200,CD27,CD69,CD80,CDK2AP2,CEBPG,CTSW,CXCL5,DDIT3,DMTN,EEF2,ENPP2,FASN,FURIN,GAS5,GRB10,HERC5,HSPA8,IFI44,IFI44L,IFRD1,IL2,IL23A,IL2RA,L3MBTL4,LINC-PINT,LTA,MCL1,MIF,MT-CO1,PARP12,PDP2,PLCG2,PRDX2,PRRC2A,RAB1B,RASGRP3,SAMD9L,SLAMF7,SLC7A11,TAPBP,TCF7,TLE3,TNFRSF10B,TP53,TRIM22,TRIM28,UBASH3B,ZNF331	56
Cell Death and Survival	Apoptosis of stem cells	0.000606	0.017		0.232	ATM,DDIT3,ITGAV,SLC2A1,TNFRSF8,TP53	6
Gastrointestinal Disease,Organismal Injury and Abnormalities	Colorectal disorder	0.000122	0.00581		0.223	ACOT7,ACTG1,ADAL,ADAM19,ADAM9,ADARB1,ADTRP,AHDC1,AIM2,ALG10B,ALYREF,ANKRD49,APEH,APOD,ARHGDIA,ATM,BAG6,C7orf50,CAPN12,CD69,CD7,CD80,CFL1,CLPP,CLTB,CNDP1,CRNDE,CTSD,CXCL5,DDIT3,DDX54,DNHD1,DOCK5,EGR1,ENPP2,EPN1,F2R,FAH,FAR1,FASN,FLNA,FNBP4,FNDC3A,FZD4,GBP3,GNG4,H2AX,HEG1,HOXB9,HSPA8,IFI44L,IGF2BP3,IL2,IL23A,IL2RA,INPP5F,ITGAE,ITGAV,KIF18B,KIF1A,L3MBTL4,LIMS2,LMOD3,MCL1,MIF,MREG,MT-CO1,MTURN,NFATC4…	127
Cancer,Cell Death and Survival,Organismal Injury and Abnormalities,Tumor Morphology	Cell death of carcinoma cells	0.00255	0.0406		0.195	DDIT3,FASN,IL2,TP53	4
Cell Death and Survival	Apoptosis of lymphoma cell lines	3.53e-05	0.00241		0.186	ARHGDIA,DDIT3,EGR1,HOXB9,IL2,LSP1,MCL1,MXD1,PLCG2,TNFRSF10B,TNFRSF8,TP53	12
Cell Death and Survival,Embryonic Development	Apoptosis of embryonic cells	0.00276	0.0427		0.186	ATM,ITGAV,SLC2A1,SMAD5,TNFRSF8,TP53	6
Humoral Immune Response,Protein Synthesis	Quantity of IgG	0.000556	0.016		0.18	ATM,B3GNT5,CCR7,CD69,CD80,H2AX,IL2,IL2RA,LTA,PIK3AP1,RASGRP3	11
Hematological System Development and Function,Lymphoid Tissue Structure and Development,Tissue Morphology	Quantity of lymphocytes	3.93e-06	0.000503		0.166	AIM2,ARHGDIA,ATM,B3GNT5,CCR7,CD27,CD69,CD7,CD80,CTSD,DDIT3,EGR1,H2AX,IL2,IL23A,IL2RA,ITGAE,ITGAV,LSP1,LTA,MCL1,MIF,MZB1,PIK3AP1,PLCG2,RASGRP3,RHOQ,SLC2A1,TAPBP,TNFRSF8,TP53,UBASH3B	32
Cell Morphology,Hematological System Development and Function	Modification of lymphocytes	0.00104	0.025		0.152	CD80,CXCL5,H2AX,IL2	4
Cell Death and Survival,Embryonic Development	Apoptosis of embryonic stem cells	0.0014	0.029		0.152	ITGAV,SLC2A1,TNFRSF8,TP53	4
Cell-To-Cell Signaling and Interaction	Activation of leukemia cell lines	0.00217	0.0367		0.152	CD80,CXCL5,IL2RA,OGT	4
Embryonic Development,Hematological System Development and Function,Lymphoid Tissue Structure and Development,Organ Development,Organismal Development,Tissue Development	Formation of lymphoid tissue	0.000319	0.0114		0.15	ATM,B3GNT5,CCR7,CD80,EGR1,FLNA,HEG1,IL2,IL23A,LTA,PRDX2,RASGRP3,SAMD9L,TCF7,TK1,TP53	16
Cancer,Organismal Injury and Abnormalities	Pelvic tumor	1.57e-05	0.00142		0.144	ACOT7,ACTB,ACTG1,ADAM19,ADAM22,ADAM9,ADARB1,AKNA,ALG10B,ALYREF,ANKRD49,APOD,ATM,BAG6,BSG,BTAF1,C5orf24,CAPN12,CAPN2,CCR7,CD69,CD80,CDK2AP2,CEP152,CHIC1,CLEC2D,CLK1,CNDP1,CREB5,CTSD,CTSH,DDIT3,DGKH,DOCK5,DPP9,EEF2,EGR1,ENPP1,ENPP2,EPN1,EZH1,F2R,FAM153A/FAM153B,FASN,FBXO22,FERMT2,FLNA,FNBP4,FNDC3A,FURIN,FZD4,GAS5,GBP3,GNA15,GNG4,GPR63,GRB10,GTPBP2,H2AX,HEG1,HERC5,HIC1,HSD17B7,HSPA8,IFI44,IFI44L,IFI…	157
Cellular Movement	Cell movement	2.26e-07	5.89e-05		0.142	ACTB,ADAM19,ADAM9,ADARB1,ADTRP,AIM2,ARHGDIA,ATM,BSG,CAPN2,CCR7,CD200,CD69,CD80,CFL1,CPEB1,CRNDE,CTSH,CTTN,CXCL5,DMTN,DOCK5,EGR1,ENPP1,ENPP2,F2R,FASN,FERMT2,FLNA,FURIN,FZD4,GAS5,HEXIM1,HIC1,HOXB9,HSPA8,HTATIP2,IFIT2,IGF2BP3,IL2,IL23A,IL2RA,ITGAE,ITGAV,JAML,KLF8,LIMS2,LSP1,LTA,MCL1,MIF,MXD1,MYADM,NFATC4,NHERF1,NORAD,NUCB2,PA2G4,PFN1,PLCG2,PPP1R9B,PRDX2,PVT1,RASGRP3,RFFL,SEPTIN9,SLC16A3,SLC2A1,SLC7A…	80
Cellular Development,Cellular Growth and Proliferation,Hematological System Development and Function,Lymphoid Tissue Structure and Development	Proliferation of lymphocytes	4.3e-05	0.00273		0.141	ARHGDIA,ATM,B3GNT5,BSG,CCR7,CD27,CD69,CD80,CTSD,EGR1,HSPA8,IL2,IL23A,IL2RA,LTA,MIF,MVP,PIK3AP1,PLCG2,PRDX2,RASGRP3,RHOQ,SLAMF7,TAPBP,TCF7,TNFRSF10B,TP53,TP53INP1,TSC22D3,UBASH3B	30
Cancer,Organismal Injury and Abnormalities,Tumor Morphology	Progression of tumor	2.35e-05	0.00183		0.137	ATM,BSG,CCR7,CD80,CPEB1,FASN,FERMT2,FLNA,HOXB9,IL2,IL2RA,KLF8,MIF,SAT1,TNFRSF10B,TP53,TUBB	17
Cellular Movement	Invasion of carcinoma cell lines	3.04e-05	0.00215		0.135	ADAM9,BSG,CTSH,EGR1,ENPP2,FURIN,HOXB9,HTATIP2,IFIT2,IGF2BP3,ITGAV,SLC7A11,TAGLN2,TP53,WSB1	15
Cancer,Organismal Injury and Abnormalities,Tissue Morphology	Quantity of secondary tumor	0.00344	0.0468		0.132	CD200,CRNDE,IL2,TP53	4
Cell Death and Survival	Apoptosis of leukocytes	0.00106	0.0252		0.13	ATM,CCR7,CD27,CD69,CD80,DDIT3,EGR1,IL2,IL2RA,LTA,MCL1,MIF,OGT,PIK3AP1,PLCG2,TNFRSF8,TP53,TSC22D3	18
Cellular Movement	Cell movement of breast cancer cell lines	0.00319	0.0452		0.125	ADAM9,CAPN2,CTTN,CXCL5,FLNA,FURIN,HIC1,ITGAV,NFATC4,PFN1,SEPTIN9,SMAD5,SOCS4,TP53	14
Cellular Development,Cellular Growth and Proliferation,Hematological System Development and Function,Lymphoid Tissue Structure and Development	Expansion of T lymphocytes	3.66e-05	0.00241		0.122	CCR7,CD27,CD69,CD80,CTSD,EGR1,HSPA8,IL2,IL23A,IL2RA,TP53	11
Cell Death and Survival	Apoptosis of blood cells	2.46e-05	0.00188		0.119	ATM,CCR7,CD27,CD69,CD7,CD80,CTSD,DDIT3,EGR1,IL2,IL2RA,LTA,MCL1,MIF,MXD1,OGT,PFN1,PIK3AP1,PLCG2,TNFRSF8,TP53,TRIM28,TSC22D3	23
Cancer,Gastrointestinal Disease,Organismal Injury and Abnormalities	Digestive system cancer	4.82e-07	0.000103		0.116	ACOT7,ACTB,ACTG1,ADAL,ADAM19,ADAM22,ADAM9,ADARB1,ADTRP,AHDC1,AIM2,AKNA,ALG10B,ANKRD49,APEH,APOBEC3H,APOD,ARHGDIA,ARMCX4,ATM,B3GNT5,BAG6,BSG,BTAF1,C15orf39,C7orf50,CAPN12,CAPN2,CCR7,CD200,CD69,CD7,CEP152,CFHR4,CFL1,CHIC1,CLEC2D,CLK1,CLPP,CLTB,CNDP1,COTL1,CREB5,CRNDE,CTSD,CTSH,CTSW,CTTN,CXCL5,DDIT3,DDX54,DGKH,DNAJC18,DNHD1,DOCK5,DPP9,EDA2R,EEF2,EGR1,ENPP1,ENPP2,EPN1,EZH1,F2R,FAH,FAR1,FASN,FLNA,FLOT…	224
Cell Morphology,Cellular Movement	Cell spreading of tumor cell lines	0.00161	0.0311		0.116	CAPN2,DOCK5,FERMT2,FLNA,MYADM,PFN1,SYNM	7
Cellular Movement,Hematological System Development and Function,Immune Cell Trafficking	Cell movement of mononuclear leukocytes	0.00113	0.0259		0.11	ACTB,BSG,CCR7,CD69,CD80,ENPP2,F2R,IL2,IL23A,IL2RA,ITGAE,ITGAV,LTA,MIF,MYADM,PFN1,TNFRSF8,TP53,UCP2	19
Hematological System Development and Function,Humoral Immune Response,Lymphoid Tissue Structure and Development,Tissue Morphology	Quantity of B lymphocytes	5.99e-06	0.000689		0.107	ARHGDIA,ATM,B3GNT5,CCR7,CD27,CD69,CD80,DDIT3,EGR1,H2AX,IL2,LTA,MZB1,PIK3AP1,PLCG2,RASGRP3,RHOQ,SLC2A1,TP53,UBASH3B	20
Developmental Disorder,Embryonic Development,Organismal Survival	Death of embryo	0.000308	0.0114		0.105	B3GNT5,BSG,CAPN2,F2R,FASN,MCL1,PFN1,PNN,TP53	9
Cellular Movement,Immune Cell Trafficking	Cell movement of lymphatic system cells	0.000239	0.00938		0.101	ACTB,BSG,CCR7,CD69,CD80,ENPP2,IL2,IL23A,IL2RA,ITGAE,ITGAV,LTA,MIF,MYADM,PFN1,PLCG2,TNFRSF8,TP53,UCP2	19
Cellular Movement,Immune Cell Trafficking	Leukocyte migration	0.000188	0.00802		0.096	ACTB,ADTRP,AIM2,BSG,CCR7,CD200,CD69,CD80,CTTN,CXCL5,DOCK5,EGR1,ENPP2,F2R,FASN,FLNA,IL2,IL23A,IL2RA,ITGAE,ITGAV,JAML,LSP1,LTA,MIF,MYADM,PA2G4,PFN1,PLCG2,SLC16A3,SLC7A11,TNFRSF10B,TNFRSF8,TP53,UCP2	35
Cellular Development,Cellular Growth and Proliferation,Hematological System Development and Function,Lymphoid Tissue Structure and Development	Cell proliferation of T lymphocytes	0.00144	0.029		0.087	ARHGDIA,ATM,BSG,CCR7,CD27,CD69,CD80,CTSD,EGR1,HSPA8,IL2,IL23A,IL2RA,LTA,MIF,MVP,PRDX2,RASGRP3,TCF7,TP53,TSC22D3,UBASH3B	22
Hematological System Development and Function,Lymphoid Tissue Structure and Development,Tissue Morphology	Quantity of TREG cells	0.000332	0.0116		0.074	CD27,CD80,IL2,IL2RA,MIF,TP53	6
Hematological System Development and Function,Tissue Morphology	Quantity of blood cells	2.69e-05	0.00194		0.063	AIM2,ARHGDIA,ATM,B3GNT5,CCR7,CD200,CD27,CD69,CD7,CD80,CTSD,DDIT3,DMTN,EGR1,FLNA,H2AX,IL2,IL23A,IL2RA,ITGAE,ITGAV,LSP1,LTA,MCL1,MIF,MXD1,MZB1,PIK3AP1,PLCG2,PRDX2,RASGRP3,RHOQ,SLC2A1,SMAD5,TAPBP,TNFRSF8,TP53,TSC22D3,UBASH3B	39
Cancer,Organismal Injury and Abnormalities,Reproductive System Disease	Genital tumor	0.00235	0.0388		0.053	ACOT7,ACTG1,ADAM19,ADAM9,ADARB1,AKNA,ALG10B,ALYREF,APOD,ATM,BAG6,BSG,BTAF1,C5orf24,CAPN12,CAPN2,CCR7,CD69,CD80,CDK2AP2,CEP152,CHIC1,CLEC2D,CLK1,CREB5,CTSD,CTSH,DDIT3,DGKH,DOCK5,DPP9,EEF2,EGR1,ENPP1,ENPP2,EPN1,EZH1,F2R,FAM153A/FAM153B,FASN,FBXO22,FERMT2,FLNA,FNDC3A,FZD4,GBP3,GNA15,GPR63,GRB10,GTPBP2,H2AX,HEG1,HERC5,HIC1,HSD17B7,HSPA8,IFI44,IFI44L,IFIT2,IFRD1,IGF2BP3,IL2,IL2RA,ITGAV,KIF18B,KIF1A,KL…	138
Cancer,Organismal Injury and Abnormalities	Growth of carcinoma	0.00152	0.0299		0.022	ATM,CD80,CXCL5,DDIT3,IL2,ITGAV,MIF,TP53	8
Hematological System Development and Function,Tissue Morphology	Quantity of leukocytes	5.64e-05	0.00339		0.018	AIM2,ARHGDIA,ATM,B3GNT5,CCR7,CD200,CD27,CD69,CD7,CD80,CTSD,DDIT3,EGR1,FLNA,H2AX,IL2,IL23A,IL2RA,ITGAE,ITGAV,LSP1,LTA,MCL1,MIF,MXD1,MZB1,PIK3AP1,PLCG2,RASGRP3,RHOQ,SLC2A1,TAPBP,TNFRSF8,TP53,UBASH3B	35
Cell Death and Survival	Apoptosis of hematopoietic cells	0.00266	0.0415		0.006	ATM,EGR1,IL2,LTA,MXD1,PFN1,PLCG2,TP53,TRIM28,TSC22D3	10
Cardiovascular System Development and Function,Organ Morphology,Skeletal and Muscular System Development and Function,Tissue Morphology	Quantity of cardiomyocytes	0.00075	0.0203		0	APOD,FURIN,HEXIM1,HSD17B7	4
Endocrine System Development and Function	Insulin sensitivity index	0.00297	0.0431		0	GRB10,NUCB2,SAT1,ZBTB20	4
Cellular Development,Cellular Growth and Proliferation,Embryonic Development	Proliferation of embryonic cell lines	0.00193	0.0349		0	ATM,EGR1,H2AX,IGF2BP3,IL2RA,MIF,MXD1,PA2G4,PNN,SAT1,TP53,TSC22D3	12
Cellular Movement,Hematological System Development and Function,Immune Cell Trafficking	Cell movement of leukocytes	0.00128	0.0279		-0.007	ACTB,AIM2,BSG,CCR7,CD69,CD80,CTTN,CXCL5,DOCK5,ENPP2,F2R,FASN,FLNA,IL2,IL23A,IL2RA,ITGAE,ITGAV,JAML,LSP1,LTA,MIF,MYADM,PFN1,PLCG2,TNFRSF8,TP53,UCP2	28
Cell Death and Survival	Killing of tumor cell lines	0.000101	0.00497		-0.014	BAG6,IL2,LTA,MCL1,PFN1,SLAMF7,TNFRSF10B,TP53	8
Cancer,Gastrointestinal Disease,Hepatic System Disease,Organismal Injury and Abnormalities	Hepatocellular carcinoma	0.00121	0.0268		-0.016	ACTG1,ADAM9,BSG,CEP152,CFHR4,CNDP1,CTSD,CTTN,EEF2,ENPP2,FAH,FASN,GAS5,HSPA8,HTATIP2,IGF2BP3,IL2,IL2RA,LTA,PFN1,PITPNM1,PLPP5,PNISR,SAMD9L,SLC7A11,TP53,TUBB,ZBTB43,ZNF345	29
Lymphoid Tissue Structure and Development,Tissue Morphology	Quantity of lymphatic system cells	2.99e-06	0.000398		-0.018	AIM2,ARHGDIA,ATM,B3GNT5,CCR7,CD27,CD69,CD7,CD80,CTSD,DDIT3,EGR1,FLNA,H2AX,IL2,IL23A,IL2RA,ITGAE,ITGAV,LSP1,LTA,MCL1,MIF,MXD1,MZB1,PIK3AP1,PLCG2,RASGRP3,RHOQ,SLC2A1,TAPBP,TNFRSF8,TP53,UBASH3B	34
Connective Tissue Disorders,Inflammatory Disease,Inflammatory Response,Organismal Injury and Abnormalities,Skeletal and Muscular Disorders	Inflammation of joint	5.51e-07	0.000107		-0.045	ADAM9,AIM2,ATM,BAG6,CAPN2,CCR7,CD200,CD27,CD69,CD80,CDK2AP2,CEBPG,CXCL5,DDIT3,DMTN,EEF2,ENPP2,FASN,FURIN,GAS5,GRB10,HSPA8,IL2,IL23A,IL2RA,L3MBTL4,LTA,MCL1,MIF,PLCG2,PRDX2,PRRC2A,RAB1B,SAMD9L,SLC7A11,TAPBP,TCF7,TLE3,TNFRSF10B,TP53,TRIM28,ZNF331	42
Cell Death and Survival	Cell death of neuroblastoma cell lines	0.00324	0.0454		-0.051	ATM,CAPN2,DDIT3,HSPA8,MCL1,MIF,PRDX2,TNFRSF10B,TP53	9
Cancer,Organismal Injury and Abnormalities	Solid tumor	1.32e-13	4.48e-10		-0.055	ACOT7,ACTB,ACTG1,ADAL,ADAM19,ADAM22,ADAM9,ADARB1,ADAT2,ADTRP,AHDC1,AIM2,AKNA,ALG10B,ALYREF,ANKRD49,APEH,APOBEC3H,APOD,ARHGDIA,ARMCX4,ARPC4,ATM,B3GNT5,BAG6,BSG,BTAF1,C15orf39,C5orf24,C7orf50,CAPN12,CAPN2,CCR7,CD200,CD27,CD69,CD7,CD80,CDK2AP2,CEBPG,CEP152,CFHR4,CFL1,CHIC1,CLEC2D,CLK1,CLPP,CLTB,CNDP1,COTL1,CPEB1,CREB5,CRNDE,CTSD,CTSH,CTSW,CTTN,CXCL5,DDIT3,DDX54,DGKH,DHRS3,DMTN,DNAJC18,DNHD1,DOCK5,DP…	266
Carbohydrate Metabolism,Cellular Function and Maintenance,Molecular Transport,Small Molecule Biochemistry	Import of D-glucose	0.00092	0.023		-0.056	ENPP1,GRB10,MIF,RHOQ,SLC2A1,TP53	6
Cellular Growth and Proliferation,Lymphoid Tissue Structure and Development	Proliferation of lymphatic system cells	3.79e-05	0.00247		-0.057	ARHGDIA,ATM,B3GNT5,BSG,CCR7,CD27,CD69,CD80,CTSD,EGR1,F2R,HSPA8,IL2,IL23A,IL2RA,LTA,MIF,MVP,PIK3AP1,PLCG2,PRDX2,RASGRP3,RHOQ,SAMD9L,SLAMF7,TAPBP,TCF7,TNFRSF10B,TP53,TP53INP1,TSC22D3,UBASH3B	32
Cellular Development,Cellular Growth and Proliferation	Cell proliferation of breast cancer cell lines	0.000373	0.0125		-0.067	ACTB,AIM2,ATM,CTSD,F2R,FASN,HEXIM1,HIC1,IL2,MCL1,NFATC4,OGT,PA2G4,PFN1,PRDX2,PVT1,SAT1,SEPTIN9,TP53,TRERF1,TRIM28	21
Digestive System Development and Function,Gastrointestinal Disease,Hepatic System Development and Function,Hepatic System Disease,Inflammatory Disease,Inflammatory Response,Organ Development,Organismal Injury and Abnormalities	Inflammation of liver	0.000732	0.02		-0.081	CCR7,CXCL5,DDIT3,EGR1,FAH,FASN,IL2,IL23A,IL2RA,LTA,PLCG2,SLC7A11,TK1,TNFRSF10B,TP53	15
Tissue Morphology	Quantity of cells	0.000653	0.0181		-0.103	ADAM9,AIM2,APOD,ARHGDIA,ATM,B3GNT5,BSG,CCR7,CD200,CD27,CD69,CD7,CD80,CTSD,DDIT3,DMTN,EGR1,F2R,FAH,FLNA,FURIN,GAS5,H2AX,HEXIM1,HSD17B7,HTATIP2,IL2,IL23A,IL2RA,ITGAE,ITGAV,KLF8,LSP1,LTA,MAF1,MCL1,MIF,MXD1,MZB1,PFN1,PIK3AP1,PLCG2,PRDX2,RASGRP3,RHOQ,SEPTIN9,SLC2A1,SMAD5,TAPBP,TK1,TNFRSF8,TP53,TRERF1,TSC22D3,UBASH3B	55
Cellular Development,Cellular Growth and Proliferation	Expansion of blood cells	0.000581	0.0166		-0.108	CCR7,CD27,CD69,CD80,CTSD,EGR1,HSPA8,IL2,IL23A,IL2RA,PLAG1,TP53	12
Cell-To-Cell Signaling and Interaction	Response of mononuclear leukocytes	0.00144	0.029		-0.111	CCR7,CD200,CD27,CD69,CD80,FURIN,IL2,IL23A,IL2RA,TAPBP,UCP2	11
Cell Death and Survival	Cell death of melanoma cell lines	0.00236	0.0389		-0.12	ATM,DDIT3,EGR1,FASN,MCL1,SAT1,TK1,TNFRSF10B,TP53,WDR19,XAF1	11
Cancer,Gastrointestinal Disease,Hepatic System Disease,Organismal Injury and Abnormalities	Liver carcinoma	0.00191	0.0347		-0.121	ACOT7,ACTB,ACTG1,ADAL,ADAM19,ADAM9,ADARB1,ADTRP,AHDC1,AKNA,APOBEC3H,ARHGDIA,ATM,BAG6,BSG,BTAF1,C7orf50,CD200,CEP152,CFHR4,CLEC2D,CLK1,CNDP1,COTL1,CREB5,CTSD,CTTN,DDIT3,DNHD1,DPP9,EEF2,ENPP1,ENPP2,FAH,FASN,FLNA,FNBP4,GAS5,GBP3,GRB10,HEG1,HIC1,HSPA8,HTATIP2,IFRD1,IGF2BP3,IL2,IL2RA,INPP5F,KIF18B,KIF1A,LTA,MCL1,MTX3,MVP,MX2,MYADM,NCALD,NUCB2,ODF2L,OGT,OTOF,PA2G4,PAN2,PARP15,PFN1,PIK3AP1,PITPNM1,PLCG2…	100
Cell Death and Survival	Apoptosis of endocrine cell lines	0.00153	0.03		-0.152	CAPN2,PRDX2,TK1,TP53	4
Cell Cycle	G2 phase	0.0016	0.0311		-0.152	ATM,CEP152,EGR1,FASN,FLNA,GRB10,H2AX,IL2,MXD1,SF3B4,SNHG1,TNFRSF8,TP53,TUBB	14
Cell-mediated Immune Response,Cellular Development,Cellular Function and Maintenance,Cellular Growth and Proliferation,Embryonic Development,Hematological System Development and Function,Hematopoiesis,Lymphoid Tissue Structure and Development,Organ Development,Organismal Development,Tissue Development	Differentiation of T lymphocytes	0.0034	0.0468		-0.164	ATM,BSG,CD69,CD80,CXCL5,EGR1,IL2,IL23A,IL2RA,PDP2,PRDX2,SLC2A1,TCF7,TNFRSF8,TP53	15
Cellular Development,Cellular Growth and Proliferation	Proliferation of blood cells	8.11e-05	0.00427		-0.2	ARHGDIA,ATM,B3GNT5,BSG,CCR7,CD27,CD69,CD80,CTSD,EGR1,HSPA8,IL2,IL23A,IL2RA,LTA,MIF,MVP,PIK3AP1,PLAG1,PLCG2,PRDX2,RASGRP3,RHOQ,SAMD9L,SLAMF7,SMAD5,TAPBP,TCF7,TNFRSF10B,TP53,TP53INP1,TSC22D3,UBASH3B	33
Cell Death and Survival	Cell death of bone cancer cell lines	0.000762	0.0206		-0.213	ATM,BAG6,DPP9,GAS5,MCL1,MIF,OGT,TNFRSF10B,TP53,TRIM28	10
Cellular Movement	Invasion of prostate cancer cell lines	0.000932	0.0231		-0.216	CAPN2,CTSH,EGR1,HIC1,MIF,PA2G4,SEPTIN9,TP53	8
Cancer,Organismal Injury and Abnormalities	Extracranial solid tumor	1.16e-13	4.48e-10		-0.219	ACOT7,ACTB,ACTG1,ADAL,ADAM19,ADAM22,ADAM9,ADARB1,ADAT2,ADTRP,AHDC1,AIM2,AKNA,ALG10B,ALYREF,ANKRD49,APEH,APOBEC3H,APOD,ARHGDIA,ARMCX4,ARPC4,ATM,B3GNT5,BAG6,BSG,BTAF1,C15orf39,C5orf24,C7orf50,CAPN12,CAPN2,CCR7,CD200,CD27,CD69,CD7,CD80,CDK2AP2,CEBPG,CEP152,CFHR4,CFL1,CHIC1,CLEC2D,CLK1,CLPP,CLTB,CNDP1,COTL1,CPEB1,CREB5,CRNDE,CTSD,CTSH,CTSW,CTTN,CXCL5,DDIT3,DDX54,DGKH,DHRS3,DMTN,DNAJC18,DNHD1,DOCK5,DP…	265
Cell Death and Survival	Apoptosis of colorectal cancer cell lines	0.00133	0.0286		-0.223	COX8A,CRNDE,DDIT3,EGR1,FASN,IL2,ITGAV,MCL1,MIF,NHERF1,TNFRSF10B,TP53	12
Organismal Survival	Organismal death	8.83e-06	0.000907		-0.233	ACTB,ACTG1,ADAM19,ADAM22,ADAM9,ADARB1,AIM2,AKNA,APOD,ARHGDIA,ATM,B3GNT5,BAG6,BSG,CAPN2,CD200,CEBPG,CFL1,CLK1,CREB5,CRNDE,CTSD,CTTN,CXCL5,DDIT3,DHRS3,ENPP2,EPN1,EZH1,F2R,FAH,FASN,FERMT2,FLNA,FURIN,GAS5,H2AX,HEXIM1,HIC1,HSD17B7,IFIT2,IGF2BP3,IL2,IL23A,IL2RA,ITGAV,KIF1A,LIMS2,LIN7B,LPAR6,LTA,MCL1,MIF,NFATC4,NHERF1,NORAD,PFN1,PIGT,PLCG2,PNN,PRKAB2,PVT1,RHEBL1,SEPTIN9,SLC25A37,SLC2A1,SLC5A3,SLC7A11,SM…	76
Protein Degradation,Protein Synthesis	Catabolism of protein	0.00264	0.0414		-0.238	ADAM19,ADAM9,APEH,BAG6,CAPN2,CFL1,CNDP1,CTSD,CTSH,FBXO22,FLNA,FLOT2,FURIN,HSPA8,KLHL15,OGT,PFN1,RFFL,SAMD9L,TP53,TRPC4AP,UFD1	22
Cellular Development,Cellular Growth and Proliferation,Embryonic Development,Hematological System Development and Function,Hematopoiesis,Lymphoid Tissue Structure and Development,Organ Development,Organismal Development,Tissue Development	Lymphopoiesis	1.39e-05	0.00129		-0.241	ATM,BSG,CCR7,CD27,CD69,CD80,CEBPG,CXCL5,EGR1,FURIN,IL2,IL23A,IL2RA,LSP1,LTA,MCL1,MIF,MZB1,PDP2,PIK3AP1,PLCG2,PRDX2,RASGRP3,SLC2A1,TAPBP,TCF7,TK1,TNFRSF8,TP53	29
Cellular Development,Cellular Growth and Proliferation,Hematological System Development and Function,Hematopoiesis,Lymphoid Tissue Structure and Development,Tissue Development	Hematopoiesis of mononuclear leukocytes	1.94e-05	0.0016		-0.241	ATM,BSG,CCR7,CD27,CD69,CD80,CEBPG,CXCL5,EGR1,FASN,FURIN,IL2,IL23A,IL2RA,LSP1,LTA,MCL1,MIF,MZB1,PDP2,PIK3AP1,PLCG2,PRDX2,RASGRP3,SLC2A1,TAPBP,TCF7,TK1,TNFRSF8,TP53	30
Cell-To-Cell Signaling and Interaction,Inflammatory Response	Immune response of leukocytes	0.00324	0.0454		-0.251	CCR7,CD27,CD69,CD80,F2R,FURIN,IL2,IL23A,IL2RA,MIF,TAPBP,TP53,UCP2	13
Cancer,Organismal Injury and Abnormalities	Abdominal adenocarcinoma	4.2e-11	2.59e-08		-0.26	ACOT7,ACTB,ACTG1,ADAL,ADAM19,ADAM22,ADAM9,ADARB1,AHDC1,AIM2,AKNA,ALG10B,ANKRD49,APEH,APOBEC3H,APOD,ARHGDIA,ARMCX4,ATM,B3GNT5,BAG6,BSG,BTAF1,C15orf39,C5orf24,C7orf50,CAPN12,CAPN2,CCR7,CD69,CD7,CD80,CDK2AP2,CEP152,CFHR4,CFL1,CHIC1,CLEC2D,CLK1,CLPP,CLTB,CNDP1,COTL1,CREB5,CRNDE,CTSD,CTSW,CTTN,CXCL5,DDIT3,DDX54,DGKH,DMTN,DNAJC18,DNHD1,DOCK5,DPP9,EDA2R,EEF2,EGR1,ENPP1,ENPP2,EPN1,EZH1,F2R,FAH,FAM153A/FA…	229
Cardiovascular Disease,Hematological Disease,Organismal Injury and Abnormalities	Anemia	0.000335	0.0116		-0.264	CCR7,CD69,DMTN,EGR1,IL2,IL2RA,LPAR6,MIF,MT-CO1,NFATC4,PIGT,PLCG2,PRDX2,SLC25A37,SLC2A1,SLC7A11,TLE3,TP53,TRIM28	19
Cell Death and Survival	Cell viability of squamous cell carcinoma cell lines	0.000668	0.0184		-0.277	FASN,MCL1,SAT1,TP53	4
Cellular Development,Cellular Growth and Proliferation,Hematological System Development and Function,Lymphoid Tissue Structure and Development	Proliferation of naive lymphocytes	0.00255	0.0406		-0.293	CD69,CD80,IL2,SLAMF7	4
Cell-mediated Immune Response,Cellular Movement,Hematological System Development and Function,Immune Cell Trafficking	Movement of CD4+ T-lymphocytes	0.00223	0.0375		-0.314	BSG,CCR7,ENPP2,IL23A,ITGAV	5
Hematological System Development and Function,Lymphoid Tissue Structure and Development,Tissue Development	Growth of lymphoid tissue	0.00291	0.0431		-0.314	CCR7,CD80,EGR1,IL2,IL2RA,LTA,MIF,RASGRP3,TP53	9
Cellular Growth and Proliferation	Expansion of cells	0.00289	0.0431		-0.315	ATM,CCR7,CD27,CD69,CD80,CTSD,EGR1,HSPA8,IL2,IL23A,IL2RA,PLAG1,TP53	13
Cancer,Gastrointestinal Disease,Organismal Injury and Abnormalities	Large intestine neoplasm	7.98e-06	0.000845		-0.328	ACOT7,ACTB,ACTG1,ADAL,ADAM19,ADAM22,ADAM9,ADARB1,ADTRP,AHDC1,AIM2,AKNA,ALG10B,ALYREF,ANKRD49,APEH,APOD,ARHGDIA,ARMCX4,ATM,B3GNT5,BAG6,BTAF1,C15orf39,C7orf50,CAPN12,CAPN2,CD69,CD7,CEP152,CFHR4,CFL1,CHIC1,CLPP,CLTB,CNDP1,COTL1,CREB5,CRNDE,CTSD,CTSW,CTTN,DDIT3,DDX54,DGKH,DNAJC18,DNHD1,DOCK5,DPP9,EDA2R,EEF2,EGR1,ENPP2,EPN1,EZH1,F2R,FAH,FAR1,FASN,FLNA,FLOT2,FNBP4,FNDC3A,FURIN,FZD4,GBP3,GNA15,GNG4,GPAA…	198
Cancer,Gastrointestinal Disease,Organismal Injury and Abnormalities	Colorectal tumor	0.000121	0.00581		-0.328	ACOT7,ACTG1,ADAL,ADAM19,ADAM9,ADARB1,ADTRP,AHDC1,AIM2,ALG10B,ALYREF,ANKRD49,APEH,APOD,ARHGDIA,ATM,BAG6,C7orf50,CAPN12,CD69,CD7,CFL1,CLPP,CLTB,CNDP1,CRNDE,CTSD,DDIT3,DDX54,DNHD1,DOCK5,EGR1,ENPP2,EPN1,F2R,FAH,FAR1,FASN,FLNA,FNBP4,FNDC3A,FZD4,GBP3,GNG4,H2AX,HEG1,HOXB9,HSPA8,IFI44L,IGF2BP3,IL2,IL2RA,INPP5F,ITGAE,ITGAV,KIF18B,KIF1A,L3MBTL4,LIMS2,LMOD3,MCL1,MIF,MREG,MT-CO1,MTURN,NFATC4,NHSL2,NUCB2,OTOF…	124
Cancer,Gastrointestinal Disease,Organismal Injury and Abnormalities	Colon tumor	0.000506	0.0152		-0.328	ACOT7,ACTG1,ADAL,ADAM19,ADARB1,AHDC1,AIM2,ALG10B,ALYREF,ANKRD49,APEH,APOD,ARHGDIA,ATM,BAG6,C7orf50,CAPN12,CD69,CD7,CLPP,CLTB,CNDP1,DDIT3,DDX54,DNHD1,DOCK5,EGR1,EPN1,FAH,FAR1,FASN,FLNA,FNBP4,FNDC3A,FZD4,GBP3,GNG4,H2AX,HEG1,HOXB9,HSPA8,IFI44L,IGF2BP3,IL2,INPP5F,ITGAV,KIF18B,KIF1A,L3MBTL4,LIMS2,LMOD3,MCL1,MIF,MREG,MTURN,NFATC4,NHSL2,NUCB2,OTOF,PDP2,PIK3AP1,PITPNM1,PLCG2,PLEKHH2,PNISR,POLD2,PPFIBP1,P…	107
Cell-To-Cell Signaling and Interaction	Activation of tumor cell lines	0.000616	0.0173		-0.342	CD80,CXCL5,IL2,IL2RA,OGT,TNFRSF8,TP53	7
Cancer,Organismal Injury and Abnormalities	Growth of tumor	2.62e-05	0.00194		-0.369	ADAM9,ATM,BSG,CAPN2,CD80,COX8A,CRNDE,CTTN,CXCL5,DDIT3,EGR1,F2R,FASN,FLNA,H2AX,HIC1,HOXB9,HSPA8,HTATIP2,IL2,ITGAV,LTA,MCL1,MIF,OGT,PA2G4,SAT1,SEPTIN9,SLC16A3,SLC2A1,SLC7A11,SMAD5,SNHG1,TNFRSF10B,TP53,TRIM22	36
Cell Death and Survival	Apoptosis of myeloid cells	0.00161	0.0311		-0.373	CD69,DDIT3,IL2,MCL1,MIF,PIK3AP1,TNFRSF8,TP53,TRIM28,TSC22D3	10
Cell Death and Survival	Cytolysis	1.29e-06	0.000223		-0.378	CCR7,CD69,CD7,CEBPG,DMTN,FURIN,IL2,IL2RA,LPAR6,LTA,PIGT,PLCG2,PRDX2,SH3BGRL3,SLAMF7,TAPBP,TNFRSF10B,TP53	18
Cellular Function and Maintenance	Cellular homeostasis	3.96e-05	0.00256		-0.389	ATM,BAG6,BSG,CCR7,CD27,CD69,CD7,CD80,CTSD,CTTN,CXCL5,DDIT3,EEF2,EGR1,ENPP1,F2R,FURIN,GAS5,HSPA8,IL2,IL23A,IL2RA,ITGAV,KCTD7,LTA,MAF1,MCL1,MIF,MYADM,NHERF1,NUCB2,PDP2,PLCG2,PRDX2,PRKAB2,RASGRP3,RUFY4,SEPTIN9,SLC25A6,SLC2A1,TAPBP,TCF7,TK1,TMPRSS3,TNFRSF10B,TNFRSF8,TOMM22,TP53,TP53INP1,TRIM22,TSC22D3,UBASH3B,UCP2,YOD1	54
Cancer,Gastrointestinal Disease,Organismal Injury and Abnormalities	Development of digestive organ tumor	3.56e-05	0.00241		-0.426	ACOT7,ACTG1,ADAL,ADAM19,ADAM22,ADAM9,ADARB1,AHDC1,AIM2,ALG10B,ANKRD49,APEH,APOD,ARHGDIA,ATM,BAG6,BSG,BTAF1,C7orf50,CAPN12,CD69,CD7,CLPP,CLTB,CNDP1,CRNDE,DDIT3,DDX54,DGKH,DNHD1,DOCK5,EEF2,EGR1,EPN1,FAH,FAR1,FASN,FLNA,FNBP4,FNDC3A,GAS5,GBP3,GNG4,H2AX,HEG1,HOXB9,HSPA8,HTATIP2,IFI44L,IGF2BP3,IL2,IL2RA,INPP5F,ITGAE,ITGAV,KIF18B,KIF1A,L3MBTL4,LIMS2,LMOD3,LTA,MCL1,MIF,MREG,MTURN,NFATC4,NHSL2,NUCB2,OTOF,…	124
Cellular Movement	Invasion of hepatoma cell lines	0.000101	0.00497		-0.436	ADAM9,BSG,ENPP2,GAS5,HOXB9,HTATIP2,TAGLN2	7
Organismal Injury and Abnormalities	Damage of epithelial tissue	0.00182	0.0336		-0.436	ARHGDIA,CTTN,EGR1,F2R,IL2,MIF,MYADM	7
Protein Synthesis	Quantity of TNF in blood	0.00329	0.0459		-0.447	AIM2,ENPP2,IFIT2,MIF,TP53	5
Cancer,Hematological Disease,Organismal Injury and Abnormalities	Growth of hematological system tumor	0.000909	0.0228		-0.453	ATM,CD80,IL2,LTA,MCL1,TP53,TRIM22	7
Cellular Movement	Invasion of tumor cell lines	4.89e-07	0.000103		-0.454	ADAM9,ARHGDIA,BSG,CAPN12,CAPN2,CCR7,CRNDE,CTSD,CTSH,CTTN,CXCL5,EGR1,ENPP2,F2R,FURIN,GAS5,HEXIM1,HIC1,HOXB9,HTATIP2,IFIT2,IGF2BP3,ITGAV,KLF8,MIF,NFATC4,NHERF1,NORAD,PA2G4,PVT1,RHOQ,SEPTIN9,SLC2A1,SLC7A11,SMAD5,TAGLN2,TP53,WSB1	38
Hematological System Development and Function,Hematopoiesis,Tissue Morphology	Quantity of hematopoietic progenitor cells	4.6e-05	0.00286		-0.461	ARHGDIA,ATM,CCR7,CD69,CD7,CD80,CTSD,DMTN,FLNA,IL2,LTA,MCL1,MXD1,MZB1,PIK3AP1,PLCG2,PRDX2,SMAD5,TNFRSF8,TP53,TSC22D3	21
Cell Death and Survival	Cell death of blood cells	3.68e-06	0.00048		-0.466	AIM2,ATM,CCR7,CD27,CD69,CD7,CD80,CTSD,DDIT3,EGR1,F2R,IL2,IL2RA,LTA,MCL1,MIF,MVP,MXD1,MZB1,OGT,PFN1,PIK3AP1,PLCG2,SLC2A1,SLC7A11,TCF7,TNFRSF8,TP53,TRIM28,TSC22D3,TUBB	31
Lymphoid Tissue Structure and Development,Tissue Morphology	Quantity of lymphoid tissue	7.84e-05	0.00418		-0.473	ARHGDIA,ATM,B3GNT5,CCR7,CD200,CD7,CD80,CTSD,IL2,LTA,MCL1,PIK3AP1,PLCG2,PRDX2,RHOQ,TNFRSF8,TP53,UBASH3B	18
Hematological System Development and Function,Hematopoiesis,Lymphoid Tissue Structure and Development,Organ Morphology,Tissue Morphology	Quantity of double-positive thymocyte	0.000997	0.0243		-0.478	ARHGDIA,ATM,CD7,CD80,CTSD,IL2,TP53	7
Cancer,Gastrointestinal Disease,Organismal Injury and Abnormalities	Gastrointestinal tumor	1.54e-06	0.000254		-0.499	ACOT7,ACTB,ACTG1,ADAL,ADAM19,ADAM22,ADAM9,ADARB1,ADTRP,AHDC1,AIM2,AKNA,ALG10B,ALYREF,ANKRD49,APEH,APOD,ARHGDIA,ARMCX4,ATM,B3GNT5,BAG6,BSG,BTAF1,C15orf39,C7orf50,CAPN12,CAPN2,CCR7,CD69,CD7,CEP152,CFHR4,CFL1,CHIC1,CLPP,CLTB,CNDP1,COTL1,CREB5,CRNDE,CTSD,CTSH,CTSW,CTTN,DDIT3,DDX54,DGKH,DNAJC18,DNHD1,DOCK5,DPP9,EDA2R,EEF2,EGR1,ENPP2,EPN1,EZH1,F2R,FAH,FAR1,FASN,FLNA,FLOT2,FNBP4,FNDC3A,FURIN,FZD4,GAS5,G…	208
Cell Death and Survival	Cell death of immune cells	2.26e-05	0.00178		-0.511	AIM2,ATM,CCR7,CD27,CD69,CD7,CD80,CTSD,DDIT3,EGR1,F2R,IL2,IL2RA,LTA,MCL1,MIF,MVP,MZB1,OGT,PIK3AP1,PLCG2,SLC2A1,SLC7A11,TCF7,TNFRSF8,TP53,TSC22D3,TUBB	28
Cellular Development,Cellular Growth and Proliferation,Hematological System Development and Function,Hematopoiesis,Lymphoid Tissue Structure and Development,Tissue Development	Leukopoiesis	6.11e-05	0.00354		-0.513	ATM,BSG,CCR7,CD27,CD69,CD80,CEBPG,CXCL5,EGR1,FASN,FURIN,IFRD1,IL2,IL23A,IL2RA,LSP1,LTA,MCL1,MIF,MZB1,PDP2,PIK3AP1,PLCG2,PRDX2,RASGRP3,RFFL,SLC2A1,TAPBP,TCF7,TK1,TNFRSF8,TP53	32
Auditory Disease,Neurological Disease	Hearing loss	0.00186	0.0339		-0.555	ACTB,ACTG1,CD164,CLPP,FZD4,MT-CO1,NHERF1,OTOF,SF3B4,SLC7A11,TMPRSS3	11
Cell Death and Survival	Killing of cells	6.16e-05	0.00354		-0.556	BAG6,CEBPG,CTSD,FASN,IL2,IL2RA,ITGAE,LTA,MCL1,PFN1,SLAMF7,TNFRSF10B,TP53	13
Cell-To-Cell Signaling and Interaction,Inflammatory Response	Immune response of T lymphocytes	0.00015	0.00674		-0.563	CCR7,CD27,CD69,FURIN,IL2,IL23A,IL2RA,TAPBP,UCP2	9
Cancer,Organismal Injury and Abnormalities	Malignant solid tumor	6.95e-13	1.41e-09		-0.575	ACOT7,ACTB,ACTG1,ADAL,ADAM19,ADAM22,ADAM9,ADARB1,ADAT2,ADTRP,AHDC1,AIM2,AKNA,ALG10B,ALYREF,ANKRD49,APEH,APOBEC3H,APOD,ARHGDIA,ARMCX4,ARPC4,ATM,B3GNT5,BAG6,BSG,BTAF1,C15orf39,C5orf24,C7orf50,CAPN12,CAPN2,CCR7,CD200,CD27,CD69,CD7,CD80,CDK2AP2,CEBPG,CEP152,CFHR4,CFL1,CHIC1,CLEC2D,CLK1,CLPP,CLTB,CNDP1,COTL1,CPEB1,CREB5,CRNDE,CTSD,CTSH,CTSW,CTTN,CXCL5,DDIT3,DDX54,DGKH,DHRS3,DMTN,DNAJC18,DNHD1,DOCK5,DP…	264
Cell Death and Survival	Cell death of myeloid cells	0.000535	0.0156		-0.603	AIM2,CD69,DDIT3,IL2,MCL1,MIF,PIK3AP1,SLC7A11,TNFRSF8,TP53,TRIM28,TSC22D3	12
Cardiovascular System Development and Function	Development of vasculature	0.00141	0.029		-0.623	ADAM19,ADAM9,ARHGDIA,ATM,BSG,CAPN2,CCR7,CTSH,CTTN,CXCL5,DDIT3,EGR1,ENPP1,ENPP2,EPN1,F2R,FERMT2,FLNA,FURIN,FZD4,GAS5,H2AX,HEG1,HEXIM1,HSD17B7,HTATIP2,IL2,ITGAV,NFATC4,OGT,PRKAB2,SAT1,SEPTIN9,SMAD5,TP53	35
Inflammatory Response	Inflammation of body cavity	0.000415	0.0135		-0.649	ACTB,ARHGDIA,ATM,BSG,CCR7,CD200,CD69,CD80,COTL1,CTSD,CXCL5,DDIT3,EGR1,FAH,FASN,HERC5,IFI44,IL2,IL23A,IL2RA,LINC-PINT,LTA,MIF,PARP12,PLCG2,PRDX2,SAT1,SLC2A1,SLC7A11,TK1,TNFRSF10B,TP53,TP53INP1,TUBB	34
Lipid Metabolism,Small Molecule Biochemistry	Synthesis of lipid	0.00106	0.0252		-0.658	ACOT7,B3GNT5,CD7,COTL1,EGR1,ENPP2,F2R,FAR1,FASN,GPAA1,GRB10,HACD1,HSD17B7,HSPA8,IL2,INPP5F,MIF,MZB1,NHERF1,PITPNM1,PLCG2,PRDX2,PRKAB2,RHOQ,STARD4,TP53,TRERF1,ZBTB20	28
Cancer,Hematological Disease,Immunological Disease,Organismal Injury and Abnormalities	Development of non-Hodgkin lymphoma	0.00255	0.0406		-0.665	ATM,EGR1,MCL1,TP53	4
Cancer,Hematological Disease,Immunological Disease,Organismal Injury and Abnormalities	T-cell non-Hodgkin lymphoma	2.15e-06	0.000312		-0.667	ADAM19,AIM2,ATM,CCR7,CD200,CD27,CD69,CD7,CLK1,CTSH,EGR1,FERMT2,H2AX,HIC1,IFI44,IFI44L,IFIT2,IL2,IL2RA,MCL1,TNFRSF8,TP53,TRERF1,ZNF331	24
Cancer,Hematological Disease,Immunological Disease,Organismal Injury and Abnormalities	T-cell malignant neoplasm	4.58e-05	0.00286		-0.667	ADAM19,AIM2,ATM,CCR7,CD200,CD27,CD69,CD7,CLK1,CTSH,EGR1,FERMT2,H2AX,HIC1,HSPA8,IFI44,IFI44L,IFIT2,IL2,IL2RA,MCL1,TCF7,TNFRSF8,TP53,TRERF1,ZNF331	26
Cell Death and Survival	Cell death of macrophages	0.00342	0.0468		-0.675	AIM2,DDIT3,MCL1,MIF,PIK3AP1,SLC7A11,TP53	7
Lymphoid Tissue Structure and Development,Organ Morphology,Tissue Morphology	Quantity of lymphoid organ	7.67e-05	0.00413		-0.7	ARHGDIA,ATM,B3GNT5,CCR7,CD200,CD7,CD80,CTSD,IL2,LTA,MCL1,PRDX2,TNFRSF8,TP53,UBASH3B	15
Humoral Immune Response,Protein Synthesis	Quantity of IgG2a	8.42e-05	0.00433		-0.707	ATM,B3GNT5,CCR7,CD69,CD80,IL2,IL2RA,RASGRP3	8
Developmental Disorder,Immunological Disease,Organismal Injury and Abnormalities	Hypoplasia of lymphoid organ	0.00169	0.032		-0.707	ARHGDIA,ATM,CTSD,MCL1,PIK3AP1,PLCG2,TK1,TP53	8
Cancer,Organismal Injury and Abnormalities	Advanced extracranial solid tumor	0.00146	0.0292		-0.734	BSG,CCR7,CD200,CPEB1,CRNDE,ENPP2,F2R,FAM153A/FAM153B,FLNA,H2AX,IL2,IL2RA,KLF8,PRDX2,SLC16A3,SLC5A3,SLC7A11,TNFRSF10B,TNFRSF8,TP53,TUBB,ZNF738	22
Cell Death and Survival	Apoptosis of bone cancer cell lines	0.00278	0.0429		-0.735	ATM,GAS5,MCL1,MIF,OGT,TNFRSF10B,TP53,TRIM28	8
Post-Translational Modification,Protein Degradation,Protein Synthesis	Hydrolysis of protein fragment	0.000162	0.00709		-0.739	ADAM19,ADAM9,APEH,BAG6,CAPN2,CFL1,CNDP1,CTSD,CTSH,HSPA8,OGT,TP53	12
Cell Death and Survival	Cell death of colorectal cancer cell lines	0.000847	0.0222		-0.743	CAPN2,COX8A,CRNDE,DDIT3,EGR1,FASN,IL2,ITGAV,MCL1,MIF,NHERF1,TK1,TNFRSF10B,TP53	14
Cancer,Gastrointestinal Disease,Organismal Injury and Abnormalities	Large intestine carcinoma	2.04e-06	0.00031		-0.762	ACOT7,ACTB,ACTG1,ADAL,ADAM19,ADAM22,ADAM9,ADARB1,AHDC1,AIM2,AKNA,ALG10B,ANKRD49,APEH,APOD,ARHGDIA,ARMCX4,ATM,B3GNT5,BAG6,BTAF1,C15orf39,C7orf50,CAPN12,CAPN2,CD69,CD7,CEP152,CFHR4,CFL1,CHIC1,CLPP,CLTB,CNDP1,COTL1,CREB5,CRNDE,CTSD,CTSW,CTTN,DDIT3,DDX54,DGKH,DNAJC18,DNHD1,DOCK5,DPP9,EDA2R,EEF2,EGR1,ENPP2,EPN1,EZH1,FAH,FAR1,FASN,FLNA,FLOT2,FNBP4,FNDC3A,FURIN,FZD4,GBP3,GNA15,GNG4,GPAA1,GRB10,GTPBP2,H2…	192
Cancer,Gastrointestinal Disease,Organismal Injury and Abnormalities	Malignant neoplasm of large intestine	1.75e-05	0.00152		-0.762	ACOT7,ACTB,ACTG1,ADAL,ADAM19,ADAM22,ADAM9,ADARB1,ADTRP,AHDC1,AIM2,AKNA,ALG10B,ANKRD49,APEH,APOD,ARHGDIA,ARMCX4,ATM,B3GNT5,BAG6,BTAF1,C15orf39,C7orf50,CAPN12,CAPN2,CD69,CD7,CEP152,CFHR4,CFL1,CHIC1,CLPP,CLTB,CNDP1,COTL1,CREB5,CRNDE,CTSD,CTSW,CTTN,DDIT3,DDX54,DGKH,DNAJC18,DNHD1,DOCK5,DPP9,EDA2R,EEF2,EGR1,ENPP2,EPN1,EZH1,F2R,FAH,FAR1,FASN,FLNA,FLOT2,FNBP4,FNDC3A,FURIN,FZD4,GBP3,GNA15,GNG4,GPAA1,GRB10…	196
Cancer,Gastrointestinal Disease,Organismal Injury and Abnormalities	Colorectal carcinoma	8.23e-05	0.00429		-0.762	ACOT7,ACTG1,ADAL,ADAM19,ADARB1,AHDC1,AIM2,ALG10B,ANKRD49,APEH,APOD,ARHGDIA,ATM,BAG6,C7orf50,CAPN12,CD69,CD7,CLPP,CLTB,CNDP1,CRNDE,DDIT3,DDX54,DNHD1,DOCK5,EGR1,EPN1,FAH,FAR1,FASN,FLNA,FNBP4,FNDC3A,GBP3,GNG4,H2AX,HEG1,HOXB9,HSPA8,IFI44L,IGF2BP3,IL2,IL2RA,INPP5F,ITGAE,ITGAV,KIF18B,KIF1A,L3MBTL4,LIMS2,LMOD3,MCL1,MIF,MREG,MTURN,NFATC4,NHSL2,NUCB2,OTOF,PDP2,PIK3AP1,PITPNM1,PLCG2,PLEKHH2,PNISR,POLD2,PPF…	110
Cancer,Gastrointestinal Disease,Organismal Injury and Abnormalities	Colon carcinoma	0.000189	0.00802		-0.762	ACOT7,ACTG1,ADAL,ADAM19,ADARB1,AHDC1,AIM2,ALG10B,ANKRD49,APEH,APOD,ARHGDIA,ATM,BAG6,C7orf50,CAPN12,CD69,CD7,CLPP,CLTB,CNDP1,DDIT3,DDX54,DNHD1,DOCK5,EGR1,EPN1,FAH,FAR1,FASN,FLNA,FNBP4,FNDC3A,GBP3,GNG4,H2AX,HEG1,HOXB9,HSPA8,IFI44L,IGF2BP3,IL2,INPP5F,ITGAV,KIF18B,KIF1A,L3MBTL4,LIMS2,LMOD3,MCL1,MIF,MREG,MTURN,NFATC4,NHSL2,NUCB2,OTOF,PDP2,PIK3AP1,PITPNM1,PLCG2,PLEKHH2,PNISR,POLD2,PPFIBP1,PRRC2A,RANBP6…	104
Cancer,Gastrointestinal Disease,Organismal Injury and Abnormalities	Colorectal cancer	0.000216	0.0089		-0.762	ACOT7,ACTG1,ADAL,ADAM19,ADAM9,ADARB1,ADTRP,AHDC1,AIM2,ALG10B,ANKRD49,APEH,APOD,ARHGDIA,ATM,BAG6,C7orf50,CAPN12,CD69,CD7,CFL1,CLPP,CLTB,CNDP1,CRNDE,DDIT3,DDX54,DNHD1,DOCK5,EGR1,ENPP2,EPN1,F2R,FAH,FAR1,FASN,FLNA,FNBP4,FNDC3A,FZD4,GBP3,GNG4,H2AX,HEG1,HOXB9,HSPA8,IFI44L,IGF2BP3,IL2,IL2RA,INPP5F,ITGAE,ITGAV,KIF18B,KIF1A,L3MBTL4,LIMS2,LMOD3,MCL1,MIF,MREG,MT-CO1,MTURN,NFATC4,NHSL2,NUCB2,OTOF,PDP2,PIK3AP…	121
Cancer,Gastrointestinal Disease,Organismal Injury and Abnormalities	Colon cancer	0.000785	0.021		-0.762	ACOT7,ACTG1,ADAL,ADAM19,ADARB1,AHDC1,AIM2,ALG10B,ANKRD49,APEH,APOD,ARHGDIA,ATM,BAG6,C7orf50,CAPN12,CD69,CD7,CLPP,CLTB,CNDP1,DDIT3,DDX54,DNHD1,DOCK5,EGR1,EPN1,FAH,FAR1,FASN,FLNA,FNBP4,FNDC3A,FZD4,GBP3,GNG4,H2AX,HEG1,HOXB9,HSPA8,IFI44L,IGF2BP3,IL2,INPP5F,ITGAV,KIF18B,KIF1A,L3MBTL4,LIMS2,LMOD3,MCL1,MIF,MREG,MTURN,NFATC4,NHSL2,NUCB2,OTOF,PDP2,PIK3AP1,PITPNM1,PLCG2,PLEKHH2,PNISR,POLD2,PPFIBP1,PRRC2A,R…	105
Cell-mediated Immune Response,Cellular Development,Cellular Function and Maintenance,Cellular Growth and Proliferation,Embryonic Development,Hematological System Development and Function,Hematopoiesis,Lymphoid Tissue Structure and Development,Organ Development,Organismal Development,Tissue Development	Differentiation of thymocytes	0.0021	0.0365		-0.762	BSG,EGR1,IL2,IL23A,TP53	5
Inflammatory Response	Inflammation of secretory structure	7.44e-06	0.000827		-0.803	CCR7,CD80,COTL1,CTSD,DDIT3,IL2,IL2RA,LTA,MIF,PRDX2,SAT1,TK1,TP53INP1	13
Cell Death and Survival	Removal of cells	0.00109	0.0255		-0.818	FLNA,IL23A,ITGAV,LTA,TP53,TRIM28,UCP2	7
Cancer,Organismal Injury and Abnormalities,Renal and Urological Disease	Renal tumor	0.000924	0.023		-0.849	ACOT7,ACTB,ADAL,ADAM19,ALYREF,APOD,ATM,BSG,BTAF1,CNDP1,DMTN,DNHD1,FAH,FLNA,HSD17B7,IGF2BP3,IL2,IL2RA,MXD1,NHERF1,NHSL2,OGT,PIGT,PLAG1,PLCG2,PNISR,PRDX2,PRRC2A,PVT1,RUFY4,SAMD9L,SLC5A3,SLC7A11,TP53,TRIM22,TUBB,YBX3,YOD1	38
Cancer,Organismal Injury and Abnormalities,Renal and Urological Disease	Urinary tract tumor	2.63e-05	0.00194		-0.849	ACOT7,ACTB,ADAL,ADAM19,ADAM22,ALYREF,APOD,ATM,BSG,BTAF1,CEP152,CNDP1,DMTN,DNHD1,EZH1,FAH,FERMT2,FLNA,FNBP4,FURIN,GAS5,GNG4,H2AX,HSD17B7,IGF2BP3,IL2,IL2RA,INPP5F,ITGAV,KLHL15,L3MBTL4,LPAR6,MCL1,MVP,MX2,MXD1,MYADM,MZT2B,NHERF1,NHSL2,OGT,PA2G4,PIGT,PITPNM1,PLAG1,PLCG2,PNISR,PRDX2,PRRC2A,PVT1,RANBP6,RNF19A,RUFY4,SAMD9L,SLC2A1,SLC5A3,SLC7A11,TP53,TRIM22,TUBB,YBX3,YOD1,ZC3H4,ZNF721	64
Cardiovascular System Development and Function,Organismal Development	Vasculogenesis	0.00318	0.0452		-0.876	ADAM9,ARHGDIA,ATM,BSG,CCR7,DDIT3,EGR1,ENPP2,F2R,FERMT2,FLNA,FURIN,FZD4,GAS5,H2AX,HEG1,HEXIM1,HSD17B7,IL2,ITGAV,NFATC4,OGT,PRKAB2,SEPTIN9,SMAD5,TP53	26
Cell-To-Cell Signaling and Interaction,Hematological System Development and Function	Activation of leukocyte cell lines	0.00344	0.0468		-0.882	CD80,CFL1,IL2,LSP1	4
Connective Tissue Disorders,Inflammatory Disease,Inflammatory Response,Organismal Injury and Abnormalities,Skeletal and Muscular Disorders	Polyarthritis	0.000431	0.0136		-0.9	CD69,CD80,DDIT3,EEF2,IL2,IL23A,LTA,MCL1,TLE3,TP53	10
Organismal Injury and Abnormalities,Renal and Urological Disease	Renal lesion	0.00183	0.0336		-0.9	ACOT7,ACTB,ADAL,ADAM19,ALYREF,APOD,ARHGDIA,ATM,BSG,BTAF1,CNDP1,DMTN,DNHD1,FAH,FLNA,HSD17B7,IGF2BP3,IL2,IL2RA,MXD1,NHERF1,NHSL2,OGT,PIGT,PLAG1,PLCG2,PNISR,PRDX2,PRRC2A,PVT1,RUFY4,SAMD9L,SLC5A3,SLC7A11,TP53,TRIM22,TUBB,YBX3,YOD1	39
Cellular Movement	Invasion of cells	2.88e-06	0.00039		-0.902	ADAM9,ARHGDIA,BSG,CAPN12,CAPN2,CCR7,CRNDE,CTSD,CTSH,CTTN,CXCL5,EGR1,ENPP2,F2R,FERMT2,FLNA,FURIN,GAS5,HEXIM1,HIC1,HOXB9,HTATIP2,IFIT2,IGF2BP3,ITGAV,KLF8,MIF,NFATC4,NHERF1,NORAD,OGT,PA2G4,PFN1,PVT1,RHOQ,SEPTIN9,SLC2A1,SLC7A11,SMAD5,TAGLN2,TP53,WSB1	42
Cancer,Gastrointestinal Disease,Organismal Injury and Abnormalities	Gastrointestinal carcinoma	1.06e-06	0.000195		-0.927	ACOT7,ACTB,ACTG1,ADAL,ADAM19,ADAM22,ADAM9,ADARB1,AHDC1,AIM2,AKNA,ALG10B,ANKRD49,APEH,APOD,ARHGDIA,ARMCX4,ATM,B3GNT5,BAG6,BTAF1,C15orf39,C7orf50,CAPN12,CAPN2,CCR7,CD69,CD7,CEP152,CFHR4,CFL1,CHIC1,CLPP,CLTB,CNDP1,COTL1,CREB5,CRNDE,CTSD,CTSH,CTSW,CTTN,DDIT3,DDX54,DGKH,DNAJC18,DNHD1,DOCK5,DPP9,EDA2R,EEF2,EGR1,ENPP2,EPN1,EZH1,FAH,FAR1,FASN,FLNA,FLOT2,FNBP4,FNDC3A,FURIN,FZD4,GAS5,GBP3,GNA15,GNG4,GPAA1,…	201
Carbohydrate Metabolism,Cellular Function and Maintenance,Molecular Transport,Small Molecule Biochemistry	Transport of D-glucose	0.00163	0.0314		-0.933	ATM,ENPP1,GRB10,MIF,RHOQ,SLC2A1,SLC5A3,TP53	8
Cancer,Organismal Injury and Abnormalities	Breast or colorectal cancer	7.17e-09	2.86e-06		-0.937	ACOT7,ACTG1,ADAL,ADAM19,ADAM9,ADARB1,ADTRP,AHDC1,AIM2,ALG10B,ANKRD49,APEH,APOD,ARHGDIA,ARMCX4,ATM,B3GNT5,BAG6,BSG,C7orf50,CAPN12,CAPN2,CCR7,CD69,CD7,CD80,CDK2AP2,CFL1,CLK1,CLPP,CLTB,CNDP1,CPEB1,CRNDE,CTSD,DDIT3,DDX54,DNHD1,DOCK5,EDA2R,EGR1,ENPP2,EPN1,EZH1,F2R,FAH,FAR1,FASN,FERMT2,FLNA,FNBP4,FNDC3A,FZD4,GAS5,GBP3,GNA15,GNG4,H2AX,HEG1,HERC5,HIC1,HOXB9,HSD17B7,HSPA8,HTATIP2,IFI44L,IGF2BP3,IL2,IL23A,…	157
Cell Death and Survival	Killing of lymphoma cell lines	0.00168	0.0319		-0.94	IL2,MCL1,PFN1,SLAMF7	4
Cancer,Gastrointestinal Disease,Organismal Injury and Abnormalities	Gastrointestinal tract cancer	1.84e-06	0.000297		-0.975	ACOT7,ACTB,ACTG1,ADAL,ADAM19,ADAM22,ADAM9,ADARB1,ADTRP,AHDC1,AIM2,AKNA,ALG10B,ANKRD49,APEH,APOD,ARHGDIA,ARMCX4,ATM,B3GNT5,BAG6,BSG,BTAF1,C15orf39,C7orf50,CAPN12,CAPN2,CCR7,CD69,CD7,CEP152,CFHR4,CFL1,CHIC1,CLPP,CLTB,CNDP1,COTL1,CREB5,CRNDE,CTSD,CTSH,CTSW,CTTN,DDIT3,DDX54,DGKH,DNAJC18,DNHD1,DOCK5,DPP9,EDA2R,EEF2,EGR1,ENPP2,EPN1,EZH1,F2R,FAH,FAR1,FASN,FLNA,FLOT2,FNBP4,FNDC3A,FURIN,FZD4,GAS5,GBP3,GNA…	207
Cell Death and Survival,Organismal Injury and Abnormalities	Cell death of epidermal cells	0.00165	0.0316		-0.984	ATM,MCL1,MIF,SLC2A1,TNFRSF10B,TP53	6
Cell Morphology,Cellular Function and Maintenance	Autophagy	0.00032	0.0114		-0.997	ATM,BAG6,CTSD,DDIT3,EEF2,GAS5,HSPA8,IL2,MAF1,MCL1,PRKAB2,RUFY4,TNFRSF10B,TOMM22,TP53,TP53INP1,TRIM22,UBASH3B,UCP2,YOD1	20
Cell-To-Cell Signaling and Interaction,Hematological System Development and Function,Immune Cell Trafficking,Inflammatory Response	Activation of CD4+ T-lymphocytes	0.0032	0.0452		-1	CD27,CD80,IL2,IL2RA	4
Post-Translational Modification,Protein Degradation,Protein Synthesis	Cleavage of protein fragment	8.11e-05	0.00427		-1.039	ADAM19,ADAM9,APEH,BAG6,CAPN2,CFL1,CNDP1,CTSD,CTSH,FURIN,HSPA8,OGT,TP53	13
Cancer,Organismal Injury and Abnormalities	Advanced malignant solid tumor	0.00283	0.0431		-1.044	ADAM9,ATM,BSG,CCR7,CD200,CPEB1,CRNDE,ENPP2,F2R,FAM153A/FAM153B,FASN,FLNA,H2AX,IL2,IL2RA,KLF8,PRDX2,SLC16A3,SLC5A3,SLC7A11,TNFRSF10B,TNFRSF8,TP53,TUBB,ZNF738	25
Cell Death and Survival	Necrosis	8.12e-06	0.000847		-1.057	ACTB,ADARB1,AIM2,ARHGDIA,ATM,BAG6,BSG,CAPN2,CCR7,CD200,CD27,CD69,CD7,CD80,COX8A,CRNDE,CTSD,CTTN,DDIT3,DPP9,EDA2R,EEF2,EGR1,ENPP2,F2R,FAH,FASN,FLNA,FURIN,GAS5,GRB10,H2AX,HIC1,HOXB9,HSPA8,HTATIP2,IFRD1,IL2,IL2RA,ITGAV,KIF1A,KLF8,LIMS2,LSP1,LTA,MCL1,MIF,MOB3A,MVP,MXD1,MZB1,NFATC4,NHERF1,OGT,PA2G4,PFN1,PIGT,PIK3AP1,PLCG2,PPP1R9B,PRDX2,PRKAB2,PVT1,RNF19A,SAT1,SLC25A6,SLC2A1,SLC7A11,TAGLN2,TCF7,TK1,TNF…	82
Cell-mediated Immune Response,Cellular Development,Cellular Function and Maintenance,Cellular Growth and Proliferation,Embryonic Development,Hematological System Development and Function,Hematopoiesis,Lymphoid Tissue Structure and Development,Organ Development,Organismal Development,Tissue Development	Differentiation of memory T lymphocytes	0.00115	0.0259		-1.067	CD69,IL2,SLC2A1,TCF7	4
Cell Death and Survival	Cell death of tumor cell lines	7.92e-06	0.000845		-1.09	AIM2,ARHGDIA,ATM,BAG6,BSG,CAPN2,CD7,COX8A,CRNDE,CTSD,CTTN,DDIT3,DPP9,EDA2R,EEF2,EGR1,ENPP2,FASN,GAS5,GRB10,H2AX,HIC1,HOXB9,HSPA8,HTATIP2,IFRD1,IL2,ITGAV,KLF8,LSP1,MCL1,MIF,MOB3A,MVP,MXD1,NHERF1,OGT,PA2G4,PLCG2,PRDX2,PVT1,SAT1,SLC25A6,SLC2A1,SLC7A11,TAGLN2,TK1,TNFRSF10B,TNFRSF8,TP53,TRIM28,TSC22D3,UCP2,WDR19,WSB1,XAF1	56
Hematological System Development and Function,Hematopoiesis	Development of hematopoietic system	0.00052	0.0153		-1.11	DDIT3,EGR1,ENPP1,FLNA,IFRD1,IL2,IL2RA,LTA,MCL1,MIF,PLCG2,RASGRP3,SMAD5,TCF7,TK1,TP53,TRIM28	17
Carbohydrate Metabolism,Molecular Transport	Transport of carbohydrate	0.00114	0.0259		-1.117	ATM,ENPP1,GRB10,MIF,MVP,RHOQ,SLC2A1,SLC5A3,STX16,TP53	10
Carbohydrate Metabolism,Molecular Transport	Transport of monosaccharide	0.000837	0.0221		-1.128	ATM,ENPP1,GRB10,MIF,RHOQ,SLC2A1,SLC5A3,STX16,TP53	9
Cancer,Organismal Injury and Abnormalities	Malignant genitourinary solid tumor	1.98e-10	9.57e-08		-1.129	ACOT7,ACTB,ACTG1,ADAL,ADAM19,ADAM22,ADAM9,AHDC1,AIM2,AKNA,ALG10B,APOD,ARHGDIA,ARMCX4,ATM,B3GNT5,BAG6,BSG,BTAF1,C5orf24,CAPN12,CAPN2,CCR7,CD69,CD80,CDK2AP2,CEP152,CHIC1,CLEC2D,CLK1,CNDP1,CPEB1,CREB5,CRNDE,CTSD,CTSH,DDIT3,DGKH,DMTN,DNHD1,DOCK5,DPP9,EDA2R,EEF2,EGR1,ENPP1,ENPP2,EPN1,EZH1,F2R,FAH,FAM153A/FAM153B,FASN,FBXO22,FERMT2,FLNA,FNBP4,FNDC3A,FURIN,FZD4,GAS5,GBP3,GNA15,GNG4,GPR63,GRB10,GTPBP2,H2…	188
Cell Death and Survival,Embryonic Development	Cell viability of embryonic stem cells	0.000303	0.0114		-1.131	ATM,H2AX,OGT,TP53	4
Cancer,Organismal Injury and Abnormalities,Tumor Morphology	Invasion of malignant tumor	0.000363	0.0123		-1.134	BSG,CAPN2,CTTN,CXCL5,F2R,FASN,FERMT2,HOXB9,TP53	9
Cell Death and Survival	Apoptosis of tumor cell lines	2.22e-05	0.00177		-1.141	AIM2,ARHGDIA,ATM,BAG6,BSG,CAPN2,CD7,COX8A,CRNDE,CTSD,CTTN,DDIT3,EDA2R,EGR1,ENPP2,FASN,GAS5,GRB10,H2AX,HIC1,HOXB9,HSPA8,HTATIP2,IL2,ITGAV,LSP1,MCL1,MIF,MOB3A,MVP,MXD1,NHERF1,OGT,PA2G4,PLCG2,PVT1,SAT1,SLC2A1,TAGLN2,TNFRSF10B,TNFRSF8,TP53,TRIM28,TSC22D3,WSB1,XAF1	46
Cell Death and Survival	Cell death of antigen presenting cells	0.00126	0.0278		-1.174	AIM2,CCR7,DDIT3,IL2,MCL1,MIF,PIK3AP1,SLC7A11,TP53	9
Cancer,Organismal Injury and Abnormalities	Liquid tumor	0.00246	0.0398		-1.176	ACTB,ACTG1,ADAL,ADAM22,ALG10B,ATM,CAPN12,CAPN2,CCR7,CD200,CD27,CD7,CD80,CFL1,CLTB,CNDP1,CTSW,CTTN,EGR1,ENPP1,ENPP2,F2R,FAR1,FLNA,H2AX,HSPA8,IFI44L,IGF2BP3,IL2,IL2RA,ITGAE,KIF1A,KLHL15,MCL1,MIF,MT-CO1,PIK3AP1,PLAG1,PLCG2,PPFIBP1,PRR12,RAVER1,RUFY4,SAMD9L,SLAMF7,SLC25A39,SLC25A6,SLC2A1,SMAD5,SYNM,TCF7,TLE3,TNFRSF8,TP53,TRAPPC9,TRERF1,TUBA1B,ZDBF2,ZNF107	59
Cell Death and Survival	Cell viability of leukocytes	0.00038	0.0126		-1.192	ATM,CCR7,CD80,F2R,IL2,MCL1,MIF,MVP,PLCG2,TCF7,TNFRSF8,TP53,TSC22D3	13
Cell-To-Cell Signaling and Interaction,Hematological System Development and Function,Immune Cell Trafficking	Adhesion of immune cells	0.000342	0.0118		-1.197	ADAM9,CCR7,CD200,CD69,CD80,CTTN,F2R,FLNA,IL2,LSP1,LTA,MIF,MYADM,PRDX2,TNFRSF8,TP53	16
Cell-To-Cell Signaling and Interaction	Aggregation of cells	0.00306	0.0439		-1.227	BSG,DMTN,F2R,IL2,ITGAV,LTA,PLCG2,PRDX2,PRKAB2,SLC7A11,TNFRSF8,TP53,UBASH3B	13
Cellular Compromise,Inflammatory Response	Degranulation of phagocytes	0.00244	0.0397		-1.231	APEH,COTL1,CTSD,CTSH,DOCK5,EEF2,HSPA8,IL23A,ITGAV,MIF,MVP,NHERF1,PA2G4,PLCG2,TP53,TUBB,UBASH3B	17
Endocrine System Development and Function	Insulin sensitivity	0.00334	0.0465		-1.238	CLPP,CREB5,EGR1,FASN,GRB10,MAF1,MIF,ZBTB20	8
Inflammatory Response	Inflammation of absolute anatomical region	0.000897	0.0226		-1.258	ACTB,ARHGDIA,ATM,BSG,CCR7,CD200,CD69,CD80,COTL1,CTSD,CXCL5,DDIT3,EGR1,FAH,FASN,HERC5,HSD17B7,IFI44,IL2,IL23A,IL2RA,ITGAV,LINC-PINT,LTA,MIF,PARP12,PLCG2,PRDX2,SAT1,SLC2A1,SLC7A11,TAPBP,TK1,TNFRSF10B,TP53,TP53INP1,TUBB,UBASH3B	38
Cell-To-Cell Signaling and Interaction,Hematological System Development and Function	Aggregation of blood cells	0.000326	0.0115		-1.297	DMTN,F2R,IL2,ITGAV,LTA,PLCG2,PRDX2,PRKAB2,SLC7A11,TNFRSF8,TP53,UBASH3B	12
Cancer,Organismal Injury and Abnormalities	Lymphatic system tumor	0.00151	0.0298		-1.299	ACTB,ACTG1,ADAM19,ADAM22,ADAM9,AIM2,ATM,CCR7,CD200,CD27,CD69,CD7,CD80,CFL1,CLK1,CNDP1,CTSH,CTTN,EGR1,ENPP1,F2R,FAM8A1,FASN,FERMT2,FLNA,GNG4,GTPBP2,H2AX,HIC1,HSPA8,IFI44,IFI44L,IFIT2,IL2,IL2RA,ITGAE,ITGAV,LTA,MCL1,MIF,MIR23AHG,PLCG2,RANBP6,SEPTIN9,SLAMF7,SLC2A1,SMAD5,TCF7,TNFRSF10B,TNFRSF8,TP53,TRAPPC9,TRERF1,ZNF331	54
Cancer,Organismal Injury and Abnormalities	Extraadrenal retroperitoneal tumor	7.65e-05	0.00413		-1.301	ACOT7,ACTB,ADAL,ADAM19,ADAM22,ADAM9,AIM2,ALYREF,ANKRD49,APOBEC3H,APOD,ARMCX4,ATM,BSG,BTAF1,CAPN2,CCR7,CD7,CFHR4,CLK1,CNDP1,CTSD,CTTN,DMTN,DNHD1,DOCK5,EGR1,ENPP2,EZH1,FAH,FASN,FLNA,GRB10,H2AX,HEG1,HERC5,HSD17B7,IFI44L,IGF2BP3,IL2,IL2RA,ITGAE,ITGAV,KCTD7,MCL1,MIF,MRPL32,MXD1,MYADM,NHERF1,NHSL2,NORAD,OGT,OTOF,PA2G4,PAN2,PFN1,PIGT,PITPNM1,PLAG1,PLCG2,PLEKHH2,PNISR,PRDX2,PRR12,PRRC2A,PVT1,RAB11FIP2,RU…	90
Cancer,Hematological Disease,Organismal Injury and Abnormalities	Hematopoietic neoplasm	0.00165	0.0316		-1.306	ACTB,ACTG1,ADAL,ADAM19,ADAM22,ADAM9,AIM2,ALG10B,ATM,CAPN12,CAPN2,CCR7,CD200,CD27,CD69,CD7,CD80,CFL1,CLK1,CLTB,CNDP1,CTSH,CTSW,CTTN,EGR1,ENPP1,ENPP2,F2R,FAR1,FASN,FERMT2,FLNA,GNG4,GTPBP2,H2AX,HIC1,HSPA8,IFI44,IFI44L,IFIT2,IGF2BP3,IL2,IL2RA,ITGAE,ITGAV,KIF1A,KLHL15,LTA,MCL1,MIF,MIR23AHG,MT-CO1,PIK3AP1,PLAG1,PLCG2,PPFIBP1,PRR12,RANBP6,RAVER1,RUFY4,SAMD9L,SEPTIN9,SLAMF7,SLC25A39,SLC25A6,SLC2A1,SMAD5,…	80
Cell Death and Survival,Neurological Disease,Organismal Injury and Abnormalities	Cell death of hippocampal cells	0.00173	0.0326		-1.34	CTSD,DDIT3,PPP1R9B,SLC2A1,TP53,UCP2	6
Cancer,Hematological Disease,Immunological Disease,Organismal Injury and Abnormalities	Lymphocytic cancer	0.00238	0.039		-1.344	ACTG1,ADAM19,ADAM22,ADAM9,AIM2,ATM,CCR7,CD200,CD27,CD69,CD7,CD80,CFL1,CLK1,CNDP1,CTSH,CTTN,EGR1,ENPP1,F2R,FASN,FERMT2,FLNA,GNG4,GTPBP2,H2AX,HIC1,HSPA8,IFI44,IFI44L,IFIT2,IL2,IL2RA,ITGAE,ITGAV,LTA,MCL1,MIF,MIR23AHG,PLCG2,RANBP6,SEPTIN9,SLAMF7,SLC2A1,SMAD5,TCF7,TNFRSF10B,TNFRSF8,TP53,TRAPPC9,TRERF1,ZNF331	52
Cancer,Hematological Disease,Organismal Injury and Abnormalities	Lymphocytic neoplasm	0.00245	0.0398		-1.344	ACTG1,ADAM19,ADAM22,ADAM9,AIM2,ATM,CCR7,CD200,CD27,CD69,CD7,CD80,CFL1,CLK1,CNDP1,CTSH,CTTN,EGR1,ENPP1,F2R,FASN,FERMT2,FLNA,GNG4,GTPBP2,H2AX,HIC1,HSPA8,IFI44,IFI44L,IFIT2,IL2,IL2RA,ITGAE,ITGAV,LTA,MCL1,MIF,MIR23AHG,PLCG2,RANBP6,SEPTIN9,SLAMF7,SLC2A1,SMAD5,TCF7,TNFRSF10B,TNFRSF8,TP53,TRAPPC9,TRERF1,ZNF331	52
Cancer,Hematological Disease,Immunological Disease,Organismal Injury and Abnormalities	Neoplasia of leukocytes	0.00263	0.0414		-1.344	ACTG1,ADAM19,ADAM22,ADAM9,AIM2,ATM,CCR7,CD200,CD27,CD69,CD7,CD80,CFL1,CLK1,CNDP1,CTSH,CTTN,EGR1,ENPP1,F2R,FASN,FERMT2,FLNA,GNG4,GTPBP2,H2AX,HIC1,HSPA8,IFI44,IFI44L,IFIT2,IL2,IL2RA,ITGAE,ITGAV,LTA,MCL1,MIF,MIR23AHG,PLCG2,RANBP6,SEPTIN9,SLAMF7,SLC2A1,SMAD5,TCF7,TNFRSF10B,TNFRSF8,TP53,TRAPPC9,TRERF1,ZNF331	52
Cellular Development,Hematological System Development and Function,Lymphoid Tissue Structure and Development	Maturation of leukocytes	0.00287	0.0431		-1.345	ATM,CD69,CD80,EGR1,IL2,IL23A,IL2RA,PLCG2,TCF7,TP53	10
Embryonic Development,Hematological System Development and Function,Lymphoid Tissue Structure and Development,Organ Development,Organismal Development,Tissue Development	Formation of spleen	0.000361	0.0123		-1.387	CCR7,CD80,EGR1,FLNA,IL2,LTA,SAMD9L	7
Cell-To-Cell Signaling and Interaction	Adhesion of blood cells	0.000277	0.0106		-1.389	ADAM9,CCR7,CD200,CD69,CD80,CTTN,F2R,FLNA,IL2,LSP1,LTA,MIF,MYADM,PLCG2,PRDX2,TNFRSF8,TP53	17
Inflammatory Response	Degranulation	1.16e-05	0.0011		-1.431	APEH,BAG6,CD7,COTL1,CTSD,CTSH,CTSW,DOCK5,EEF2,FLNA,GNA15,GTPBP2,HSPA8,IL2,IL23A,ITGAE,ITGAV,MIF,MVP,NHERF1,PA2G4,PLCG2,TAGLN2,TP53,TUBB,UBASH3B	26
Cellular Compromise,Inflammatory Response	Degranulation of cells	2.93e-05	0.00209		-1.431	APEH,BAG6,CD7,COTL1,CTSD,CTSH,CTSW,DOCK5,EEF2,FLNA,GNA15,GTPBP2,HSPA8,IL2,IL23A,ITGAV,MIF,MVP,NHERF1,PA2G4,PLCG2,TAGLN2,TP53,TUBB,UBASH3B	25
Cancer,Hematological Disease,Organismal Injury and Abnormalities	Neoplasia of blood cells	0.00294	0.0431		-1.438	ACTB,ACTG1,ADAL,ADAM19,ADAM22,ADAM9,AIM2,ALG10B,ATM,CAPN12,CAPN2,CCR7,CD200,CD27,CD69,CD7,CD80,CFL1,CLK1,CLTB,CNDP1,CTSH,CTSW,CTTN,EGR1,ENPP1,F2R,FAR1,FASN,FERMT2,FLNA,GNG4,GTPBP2,H2AX,HIC1,HSPA8,IFI44,IFI44L,IFIT2,IGF2BP3,IL2,IL2RA,ITGAE,ITGAV,KIF1A,KLHL15,LTA,MCL1,MIF,MIR23AHG,MT-CO1,PIK3AP1,PLAG1,PLCG2,PPFIBP1,PRR12,RANBP6,RAVER1,RUFY4,SAMD9L,SEPTIN9,SLAMF7,SLC25A39,SLC25A6,SLC2A1,SMAD5,SYNM,T…	78
Cell Death and Survival	Cell death of phagocytes	0.00294	0.0431		-1.476	AIM2,CCR7,DDIT3,IL2,MCL1,MIF,PIK3AP1,SLC7A11,TP53,TSC22D3	10
Cell Death and Survival,Hematological System Development and Function	Cell viability of lymphocytes	0.00104	0.025		-1.479	ATM,CD80,F2R,IL2,MCL1,MIF,PLCG2,TCF7,TP53,TSC22D3	10
Cancer,Organismal Injury and Abnormalities,Tumor Morphology	Invasion of tumor	8.68e-05	0.00442		-1.48	ADAM9,BSG,CAPN2,CTTN,CXCL5,ENPP2,F2R,FASN,FERMT2,FLNA,FURIN,HOXB9,TP53	13
Cancer,Hematological Disease,Organismal Injury and Abnormalities	Hematologic cancer	0.00169	0.032		-1.548	ACTB,ACTG1,ADAL,ADAM19,ADAM22,ADAM9,AIM2,ALG10B,ATM,CAPN12,CAPN2,CCR7,CD200,CD27,CD69,CD7,CD80,CFL1,CLK1,CLTB,CNDP1,CTSH,CTSW,CTTN,EGR1,ENPP1,ENPP2,F2R,FAR1,FASN,FERMT2,FLNA,GNG4,GTPBP2,H2AX,HIC1,HSPA8,IFI44,IFI44L,IFIT2,IGF2BP3,IL2,IL2RA,ITGAE,ITGAV,KIF1A,KLHL15,LTA,MCL1,MIF,MIR23AHG,MT-CO1,PIK3AP1,PLAG1,PLCG2,PPFIBP1,PRR12,RANBP6,RAVER1,RUFY4,SAMD9L,SEPTIN9,SLAMF7,SLC25A39,SLC25A6,SLC2A1,SMAD5,…	79
Inflammatory Response,Organismal Injury and Abnormalities	Inflammation of organ	0.000203	0.00846		-1.55	ACTB,ARHGDIA,ATM,BSG,CCR7,CD200,CD69,CD7,CD80,CFL1,COTL1,CTSD,CXCL5,DDIT3,EGR1,FAH,FAM153A/FAM153B,FASN,FLNA,HERC5,HSD17B7,IFI44,IL2,IL23A,IL2RA,ITGAV,LINC-PINT,LTA,MCL1,MIF,PARP12,PLCG2,PRDX2,SAT1,SLC2A1,SLC7A11,TAPBP,TK1,TNFRSF10B,TNFRSF8,TP53,TP53INP1,TUBB,UBASH3B,ZNF331	45
Hematological System Development and Function,Hematopoiesis,Lymphoid Tissue Structure and Development,Organ Morphology,Tissue Morphology	Quantity of thymocytes	0.000992	0.0243		-1.567	ARHGDIA,ATM,CCR7,CD7,CD80,CTSD,IL2,LTA,MCL1,TNFRSF8,TP53	11
Cancer,Hematological Disease,Organismal Injury and Abnormalities	Hematologic cancer of cells	0.00118	0.0265		-1.57	ACTG1,ADAM19,ADAM22,ADAM9,AIM2,ATM,CCR7,CD200,CD27,CD69,CD7,CD80,CFL1,CLK1,CNDP1,CTSH,CTTN,EGR1,ENPP1,ENPP2,F2R,FASN,FERMT2,GNG4,GTPBP2,H2AX,HIC1,HSPA8,IFI44,IFI44L,IFIT2,IL2,IL2RA,ITGAE,LTA,MCL1,MIF,MIR23AHG,PLCG2,RANBP6,SEPTIN9,SLAMF7,SLC2A1,SMAD5,TCF7,TNFRSF10B,TNFRSF8,TP53,TRAPPC9,TRERF1,ZNF331	51
Cellular Development,Cellular Growth and Proliferation,Embryonic Development,Hematological System Development and Function,Hematopoiesis,Humoral Immune Response,Lymphoid Tissue Structure and Development,Organ Development,Organismal Development,Tissue Development	Differentiation of B lymphocytes	0.000368	0.0123		-1.593	ATM,CD27,CD69,CEBPG,EGR1,IL2,IL2RA,MZB1,PIK3AP1,PLCG2,TK1,TP53	12
Cancer,Organismal Injury and Abnormalities	Metastasis of cells	0.000236	0.0093		-1.658	CAPN2,CPEB1,CRNDE,CTTN,CXCL5,ENPP2,F2R,FASN,HOXB9,HTATIP2,IL2,ITGAV,LTA,PRDX2,TP53,WSB1	16
Cell Death and Survival	Apoptosis	1.36e-07	3.69e-05		-1.714	ADARB1,AIM2,ARHGDIA,ATM,BAG6,BSG,CAPN2,CCR7,CD164,CD200,CD27,CD69,CD7,CD80,CFL1,COX8A,CPEB1,CRNDE,CTSD,CTSH,CTTN,DDIT3,DPP9,EDA2R,EGR1,ENPP2,F2R,FAH,FASN,FLNA,FLOT2,FURIN,GAS5,GRB10,H2AX,HEXIM1,HIC1,HOXB9,HSD17B7,HSPA8,HTATIP2,IFIT2,IL2,IL2RA,ITGAV,LIMS2,LSP1,LTA,MCL1,MIF,MOB3A,MVP,MXD1,MZB1,NFATC4,NHERF1,OGT,PA2G4,PFN1,PIGT,PIK3AP1,PLCG2,PPP1R9B,PRDX2,PRKAB2,PVT1,SAT1,SEPTIN9,SH3BGRL3,SLC25A6,SL…	88
Free Radical Scavenging	Production of reactive oxygen species	0.00209	0.0365		-1.736	ACTB,ARHGDIA,COX8A,CTTN,DDIT3,DOCK5,F2R,FLNA,IL2,NHERF1,PLCG2,PRDX2,SLC2A1,TP53,UCP2	15
Cancer,Organismal Injury and Abnormalities	Cancer of cells	0.00114	0.0259		-1.764	ACTG1,ADAM19,ADAM22,ADAM9,ADARB1,AIM2,AKNA,APOBEC3H,APOD,ATM,BSG,C7orf50,CAPN12,CAPN2,CCR7,CD200,CD27,CD69,CD7,CD80,CDK2AP2,CFHR4,CFL1,CLK1,CNDP1,COTL1,CPEB1,CRNDE,CTSH,CTTN,CXCL5,DNHD1,EGR1,ENPP1,ENPP2,F2R,FAM8A1,FASN,FERMT2,FLNA,FNDC3A,FURIN,GNA15,GNG4,GRB10,GTPBP2,H2AX,HEG1,HIC1,HOXB9,HSPA8,HTATIP2,IFI44,IFI44L,IFIT2,IGF2BP3,IGIP,IL2,IL2RA,ITGAE,ITGAV,LPAR6,LTA,LUC7L3,MAGEF1,MCL1,MIF,MIR23AHG,…	106
Cancer,Cellular Movement,Organismal Injury and Abnormalities,Tumor Morphology	Invasion of tumor cells	0.00143	0.029		-1.915	ADAM9,CAPN2,CTTN,CXCL5,ENPP2,F2R,FERMT2,FLNA,HOXB9	9
Hematological System Development and Function,Lymphoid Tissue Structure and Development,Tissue Morphology	Quantity of natural killer cells	0.000378	0.0126		-1.925	CCR7,CD80,IL2,IL2RA,ITGAV,LTA,MCL1,TP53	8
Cancer,Organismal Injury and Abnormalities	Neoplasia of cells	0.000514	0.0153		-1.953	ACTB,ACTG1,ADAL,ADAM19,ADAM22,ADAM9,ADARB1,AIM2,AKNA,ALG10B,APOBEC3H,APOD,ATM,BSG,C7orf50,CAPN12,CAPN2,CCR7,CD200,CD27,CD69,CD7,CD80,CDK2AP2,CFHR4,CFL1,CLK1,CLTB,CNDP1,COTL1,CPEB1,CRNDE,CTSH,CTSW,CTTN,CXCL5,DNHD1,EGR1,ENPP1,ENPP2,F2R,FAM8A1,FAR1,FASN,FERMT2,FLNA,FNDC3A,FURIN,GNA15,GNG4,GRB10,GTPBP2,H2AX,HEG1,HIC1,HOXB9,HSPA8,HTATIP2,IFI44,IFI44L,IFIT2,IGF2BP3,IGIP,IL2,IL2RA,ITGAE,ITGAV,KIF1A,KLF8…	125
Inflammatory Response	Antibody response	0.000604	0.017		-1.982	CCR7,CD69,CD80,IL2,IL2RA,LTA,MIF,MZB1,RASGRP3	9
Cancer,Organismal Injury and Abnormalities	Advanced malignant tumor	2.2e-05	0.00177		-1.983	ACTB,ADAM9,ATM,BSG,CAPN2,CCR7,CD200,CD80,CPEB1,CRNDE,CTSH,CTTN,CXCL5,ENPP2,F2R,FAM153A/FAM153B,FASN,FLNA,H2AX,HEXIM1,HIC1,HOXB9,HTATIP2,IL2,IL23A,IL2RA,ITGAV,KLF8,LTA,MIF,NORAD,PRDX2,SLC16A3,SLC5A3,SLC7A11,TNFRSF10B,TNFRSF8,TP53,TUBB,WSB1,ZNF738	41
Cancer,Organismal Injury and Abnormalities	Secondary tumor	3.36e-05	0.00235		-1.983	ACTB,ADAM9,ATM,BSG,CAPN2,CCR7,CD200,CD80,CPEB1,CRNDE,CTSH,CTTN,CXCL5,ENPP2,F2R,FASN,FLNA,HEXIM1,HIC1,HOXB9,HTATIP2,IL2,IL23A,IL2RA,ITGAV,KLF8,LTA,MIF,NORAD,PRDX2,SLC16A3,SLC5A3,SLC7A11,TNFRSF10B,TNFRSF8,TP53,TUBB,WSB1	38
Cellular Development,Cellular Growth and Proliferation,Hematological System Development and Function,Hematopoiesis,Tissue Development	Differentiation of hematopoietic progenitor cells	0.00268	0.0417	Decreased	-2.027	BSG,EEF2,EGR1,GNA15,IL2,IL23A,IL2RA,MZB1,PIK3AP1,PLCG2,RFFL,SAMD9L,TK1,TNFRSF10B,TP53	15
Nervous System Development and Function	Neuroprotection	0.000568	0.0163	Decreased	-2.213	CAPN2,DDIT3,DGKH,F2R,NFATC4,TP53	6
Cancer,Organismal Injury and Abnormalities	Metastasis of tumor cell lines	0.00102	0.0247	Decreased	-2.293	CAPN2,CPEB1,CRNDE,CTTN,CXCL5,ENPP2,F2R,HOXB9,HTATIP2,LTA,PRDX2,TP53,WSB1	13
Cellular Development,Cellular Growth and Proliferation	Cell proliferation of tumor cell lines	4.61e-06	0.000548	Decreased	-2.408	ACTB,ADAM9,AIM2,ATM,BSG,CD80,CRNDE,CTSD,CTTN,DDIT3,EGR1,F2R,FASN,FLNA,GAS5,GNA15,GNG4,HEXIM1,HIC1,HOXB9,HTATIP2,IGF2BP3,IL2,IL23A,IL2RA,INPP5F,ITGAV,KIF1A,MCL1,MIF,NFATC4,NHERF1,NUCB2,OGT,PA2G4,PFN1,PLAG1,PLCG2,PPP1R9B,PRDX2,PVT1,SAMD9L,SAT1,SEPTIN9,SLC16A3,SLC25A6,SLC2A1,SLC7A11,SMAD5,SNHG1,SRM,SYNM,TAGLN2,TNFRSF10B,TNFRSF8,TP53,TRERF1,TRIM28,TUBB,WSB1,ZBTB20	61
Cancer,Organismal Injury and Abnormalities,Reproductive System Disease	Breast or ovarian cancer	2.59e-08	9.76e-06			ACTG1,ADAM19,ADAM9,AHDC1,AIM2,AKNA,APOD,ARHGDIA,ARMCX4,ATM,B3GNT5,BAG6,BSG,CAPN12,CAPN2,CCR7,CD69,CD80,CDK2AP2,CEP152,CLEC2D,CLK1,CNDP1,CPEB1,CREB5,CRNDE,CTSD,DGKH,EDA2R,EGR1,ENPP2,EZH1,F2R,FAM153A/FAM153B,FASN,FERMT2,FLNA,FNDC3A,GAS5,GNA15,H2AX,HERC5,HIC1,HOXB9,HSD17B7,HTATIP2,IFI44L,IGF2BP3,IL2,IL23A,IL2RA,ITGAE,ITGAV,KLF8,KLHL15,KPNA5,LPAR6,LSP1,LTA,LUC7L3,MCL1,MIF,NFATC4,NHERF1,NORAD,ODF2L,OT…	103
Connective Tissue Disorders,Immunological Disease,Inflammatory Disease,Organismal Injury and Abnormalities,Skeletal and Muscular Disorders	Lupus erythematosus	4.29e-08	1.52e-05			ADARB1,AIM2,CD69,CD80,CTSW,DDIT3,HERC5,IFI44,IFI44L,IFRD1,IL2,IL23A,LINC-PINT,MCL1,MT-CO1,PARP12,PDP2,RASGRP3,SLAMF7,TCF7,TLE3,TNFRSF10B,TRIM22,UBASH3B	24
Cancer,Organismal Injury and Abnormalities	Cancer of secretory structure	6.07e-08	1.96e-05			ACOT7,ACTG1,ADAL,ADAM19,ADAM22,ADAM9,ADARB1,ADAT2,AHDC1,AIM2,AKNA,ALYREF,ANKRD49,APOBEC3H,APOD,ARMCX4,ARPC4,ATM,BAG6,BSG,BTAF1,C15orf39,C7orf50,CAPN12,CAPN2,CCR7,CD200,CD27,CD69,CD7,CD80,CDK2AP2,CEP152,CFHR4,CFL1,CHIC1,CLK1,CLPP,CLTB,CNDP1,CREB5,CTSD,CTSH,CTTN,DDIT3,DDX54,DGKH,DHRS3,DNAJC18,DNHD1,DOCK5,DPP9,EDA2R,EEF2,EGR1,ENPP1,ENPP2,EPN1,EZH1,FAH,FAM118A,FAM153A/FAM153B,FAM8A1,FAR1,FASN,FBXO22,…	218
Connective Tissue Disorders,Immunological Disease,Inflammatory Disease,Organismal Injury and Abnormalities,Skeletal and Muscular Disorders	Systemic lupus erythematosus	8.66e-08	2.45e-05			ADARB1,AIM2,CD69,CD80,CTSW,HERC5,IFI44,IFI44L,IFRD1,IL2,IL23A,LINC-PINT,MCL1,MT-CO1,PARP12,PDP2,RASGRP3,SLAMF7,TCF7,TLE3,TNFRSF10B,TRIM22,UBASH3B	23
Cancer,Organismal Injury and Abnormalities,Reproductive System Disease	Breast cancer	3.86e-07	9.71e-05			ADAM9,AHDC1,AIM2,APOD,ARHGDIA,ARMCX4,ATM,B3GNT5,BSG,CAPN2,CCR7,CD69,CD80,CDK2AP2,CLK1,CNDP1,CPEB1,CRNDE,CTSD,EDA2R,EGR1,EZH1,FASN,FERMT2,FLNA,GAS5,GNA15,H2AX,HERC5,HIC1,HOXB9,HSD17B7,HTATIP2,IL2,IL23A,IL2RA,ITGAE,ITGAV,KLF8,KLHL15,KPNA5,LSP1,MCL1,MIF,NFATC4,NHERF1,NORAD,OTOF,PFN1,PIGT,PLPP5,PNISR,PRR12,RAVER1,SAMD9L,SEPTIN9,SF3B4,SLC25A6,SLC7A11,SPEF2,TAF1D,TAGLN2,TK1,TLE3,TNFRSF10B,TP53,TUBA1B,T…	74
Cancer,Hematological Disease,Immunological Disease,Organismal Injury and Abnormalities	Peripheral T-cell lymphoma	4.58e-07	0.000103			ADAM19,ATM,CCR7,CD200,CD27,CD69,CD7,CLK1,CTSH,FERMT2,IFI44,IFI44L,IFIT2,TNFRSF8,TP53,TRERF1,ZNF331	17
Immunological Disease,Organismal Injury and Abnormalities	Abnormality of lymph node	5.03e-07	0.000103			ARHGDIA,ATM,B3GNT5,CCR7,CD200,CD80,F2R,IL2,IL2RA,LTA,TK1,TNFRSF8,TP53	13
Cancer,Organismal Injury and Abnormalities	Anogenital cancer	9e-07	0.00017			ACOT7,ACTG1,ADAM19,ADAM9,AHDC1,AIM2,AKNA,ALG10B,APOD,ARHGDIA,ARMCX4,ATM,B3GNT5,BAG6,BSG,BTAF1,C5orf24,CAPN12,CAPN2,CCR7,CD69,CD80,CDK2AP2,CEP152,CHIC1,CLEC2D,CLK1,CNDP1,CPEB1,CREB5,CRNDE,CTSD,CTSH,DDIT3,DGKH,DOCK5,DPP9,EDA2R,EEF2,EGR1,ENPP1,ENPP2,EPN1,EZH1,F2R,FAM153A/FAM153B,FASN,FBXO22,FERMT2,FLNA,FNDC3A,FZD4,GAS5,GBP3,GNA15,GPR63,GRB10,GTPBP2,H2AX,HEG1,HERC5,HIC1,HOXB9,HSD17B7,HSPA8,HTATIP2,IF…	166
Hematological System Development and Function,Immunological Disease,Lymphoid Tissue Structure and Development,Organ Morphology,Organismal Injury and Abnormalities,Tissue Morphology	Abnormal morphology of lymph node	1.91e-06	0.000301			ARHGDIA,ATM,B3GNT5,CCR7,CD200,CD80,F2R,IL2,IL2RA,LTA,TK1,TP53	12
Endocrine System Disorders,Gastrointestinal Disease,Immunological Disease,Metabolic Disease,Organismal Injury and Abnormalities	Insulin-dependent diabetes mellitus	2.4e-06	0.00034			AIM2,BAG6,CCR7,CD27,CD7,CD80,CLEC2D,CTSH,CTSW,IFI44,IFIT2,IL2,IL2RA,ITGAE,JAML,LTA,MZB1,PRRC2A,SAMD9L,SLC7A11,TUBB,UCP2,XAF1	23
Cancer,Organismal Injury and Abnormalities	Breast or pancreatic cancer	2.63e-06	0.000364			ACTG1,ADAM19,ADAM22,ADAM9,AHDC1,AIM2,AKNA,ANKRD49,APOBEC3H,APOD,ARHGDIA,ARMCX4,ATM,B3GNT5,BAG6,BSG,BTAF1,CAPN12,CAPN2,CCR7,CD69,CD7,CD80,CDK2AP2,CEP152,CLEC2D,CLK1,CNDP1,CPEB1,CREB5,CRNDE,CTSD,CTTN,DGKH,DNHD1,DOCK5,EDA2R,EGR1,ENPP2,EZH1,F2R,FAM153A/FAM153B,FASN,FERMT2,FLNA,FNDC3A,GAS5,GNA15,GRB10,H2AX,HEG1,HERC5,HIC1,HOXB9,HSD17B7,HTATIP2,IFI44L,IGF2BP3,IL2,IL23A,IL2RA,ITGAE,ITGAV,KCTD7,KLF8,KLHL…	123
Cancer,Organismal Injury and Abnormalities	Genitourinary carcinoma	4.37e-06	0.000539			ACOT7,ACTB,ACTG1,ADAL,ADAM19,ADAM22,ADAM9,AKNA,ALG10B,APOD,ATM,BAG6,BSG,BTAF1,C5orf24,CAPN12,CAPN2,CD80,CDK2AP2,CEP152,CHIC1,CLEC2D,CLK1,CNDP1,CREB5,CTSD,CTSH,DDIT3,DGKH,DMTN,DNHD1,DOCK5,DPP9,EEF2,ENPP1,ENPP2,EPN1,EZH1,F2R,FAH,FAM153A/FAM153B,FASN,FBXO22,FERMT2,FLNA,FNBP4,FNDC3A,FURIN,FZD4,GBP3,GNA15,GNG4,GPR63,GRB10,GTPBP2,H2AX,HEG1,HERC5,HIC1,HSD17B7,HSPA8,IFI44,IFI44L,IFIT2,IFRD1,IGF2BP3,IL2,I…	156
Cancer,Organismal Injury and Abnormalities	Head and neck cancer	5.95e-06	0.000689			ACOT7,ACTG1,ADAL,ADAM19,ADAM22,ADAM9,ADARB1,ADAT2,AHDC1,AKNA,ALYREF,APOBEC3H,APOD,ARMCX4,ARPC4,ATM,BAG6,BSG,BTAF1,C15orf39,C7orf50,CAPN12,CAPN2,CCR7,CD200,CD27,CD7,CEP152,CFHR4,CFL1,CHIC1,CLK1,CLPP,CLTB,CNDP1,CTSD,CTSH,CTTN,DDX54,DGKH,DHRS3,DNAJC18,DNHD1,DOCK5,DPP9,EDA2R,EEF2,EGR1,ENPP1,ENPP2,EPN1,EZH1,FAH,FAM118A,FAM153A/FAM153B,FAM8A1,FAR1,FASN,FBXO22,FLNA,FLOT2,FNBP4,FNDC3A,FURIN,FZD4,GBP3,GNA…	203
Cancer,Organismal Injury and Abnormalities,Reproductive System Disease	Breast or gynecological cancer	7.74e-06	0.000845			ACTG1,ADAM19,ADAM9,AHDC1,AIM2,AKNA,ALG10B,APOD,ARHGDIA,ARMCX4,ATM,B3GNT5,BAG6,BSG,C5orf24,CAPN12,CAPN2,CCR7,CD69,CD80,CDK2AP2,CEP152,CLEC2D,CLK1,CNDP1,CPEB1,CREB5,CRNDE,CTSD,CTSH,DGKH,DOCK5,DPP9,EDA2R,EEF2,EGR1,ENPP1,ENPP2,EZH1,F2R,FAM153A/FAM153B,FASN,FBXO22,FERMT2,FLNA,FNDC3A,GAS5,GNA15,GRB10,GTPBP2,H2AX,HERC5,HIC1,HOXB9,HSD17B7,HTATIP2,IFI44,IFI44L,IFRD1,IGF2BP3,IL2,IL23A,IL2RA,ITGAE,ITGAV,KIF…	133
Cancer,Organismal Injury and Abnormalities	Head and neck tumor	9.75e-06	0.000987			ACOT7,ACTG1,ADAL,ADAM19,ADAM22,ADAM9,ADARB1,ADAT2,AHDC1,AKNA,ALYREF,APOBEC3H,APOD,ARMCX4,ARPC4,ATM,BAG6,BSG,BTAF1,C15orf39,C7orf50,CAPN12,CAPN2,CCR7,CD200,CD27,CD7,CEP152,CFHR4,CFL1,CHIC1,CLK1,CLPP,CLTB,CNDP1,CTSD,CTSH,CTTN,DDX54,DGKH,DHRS3,DNAJC18,DNHD1,DOCK5,DPP9,EDA2R,EEF2,EGR1,ENPP1,ENPP2,EPN1,EZH1,FAH,FAM118A,FAM153A/FAM153B,FAM8A1,FAR1,FASN,FBXO22,FLNA,FLOT2,FNBP4,FNDC3A,FURIN,FZD4,GBP3,GNA…	204
Cellular Function and Maintenance,Hematological System Development and Function	Function of T lymphocytes	1.07e-05	0.00107			ARHGDIA,ATM,CCR7,CD27,CD69,CD80,IL2,IL23A,IL2RA,MCL1,SLC2A1,TAGLN2,TAPBP,TCF7,TP53	15
Cancer,Gastrointestinal Disease,Organismal Injury and Abnormalities	Intestinal adenocarcinoma	1.08e-05	0.00107			ACOT7,ACTB,ACTG1,ADAL,ADAM19,ADAM22,ADAM9,ADARB1,AHDC1,AIM2,AKNA,ALG10B,ANKRD49,APEH,APOD,ARHGDIA,ARMCX4,ATM,B3GNT5,BAG6,BTAF1,C15orf39,C7orf50,CAPN12,CAPN2,CD69,CD7,CEP152,CFHR4,CFL1,CHIC1,CLPP,CLTB,CNDP1,COTL1,CREB5,CRNDE,CTSD,CTSW,CTTN,DDIT3,DDX54,DGKH,DNAJC18,DNHD1,DOCK5,DPP9,EDA2R,EEF2,EGR1,ENPP2,EPN1,EZH1,FAH,FAR1,FASN,FLNA,FLOT2,FNBP4,FNDC3A,FURIN,FZD4,GBP3,GNA15,GNG4,GPAA1,GRB10,GTPBP2,H2…	188
Cancer,Organismal Injury and Abnormalities	Head and neck carcinoma	1.12e-05	0.00108			ACOT7,ACTG1,ADAL,ADAM19,ADAM22,ADAM9,ADARB1,ADAT2,AHDC1,AKNA,ALYREF,APOBEC3H,APOD,ARMCX4,ARPC4,ATM,BAG6,BSG,BTAF1,C15orf39,C7orf50,CAPN12,CAPN2,CCR7,CD200,CD27,CD7,CEP152,CFHR4,CFL1,CHIC1,CLK1,CLPP,CLTB,CNDP1,CTSD,CTSH,CTTN,DDX54,DGKH,DHRS3,DNAJC18,DNHD1,DOCK5,DPP9,EDA2R,EEF2,EGR1,ENPP1,ENPP2,EPN1,EZH1,FAH,FAM118A,FAM153A/FAM153B,FAM8A1,FAR1,FASN,FBXO22,FLNA,FLOT2,FNBP4,FNDC3A,FURIN,FZD4,GBP3,GNA…	201
Cellular Function and Maintenance,Hematological System Development and Function	Function of natural killer cells	1.14e-05	0.00109			CD27,CD80,CEBPG,CLEC2D,LTA,PLCG2,TAPBP	7
Connective Tissue Disorders,Immunological Disease,Inflammatory Disease,Inflammatory Response,Organismal Injury and Abnormalities,Skeletal and Muscular Disorders	Rheumatoid arthritis	1.4e-05	0.00129			ADAM9,AIM2,ATM,BAG6,CCR7,CD69,CD80,CEBPG,CXCL5,EEF2,FURIN,GAS5,GRB10,HSPA8,IL2,IL2RA,L3MBTL4,LTA,MCL1,MIF,PRDX2,PRRC2A,RAB1B,SAMD9L,SLC7A11,TAPBP,TLE3,TNFRSF10B,TP53,TRIM28,ZNF331	31
Cancer,Hematological Disease,Immunological Disease,Organismal Injury and Abnormalities	Mature T-cell neoplasm	1.61e-05	0.00143			ADAM19,AIM2,ATM,CCR7,CD200,CD27,CD69,CD7,CLK1,CTSH,FERMT2,HIC1,IFI44,IFI44L,IFIT2,IL2,IL2RA,MCL1,TNFRSF8,TP53,TRERF1,ZNF331	22
Cancer,Gastrointestinal Disease,Organismal Injury and Abnormalities	Gastrointestinal adenocarcinoma	1.7e-05	0.0015			ACOT7,ACTB,ACTG1,ADAL,ADAM19,ADAM22,ADAM9,ADARB1,AHDC1,AIM2,AKNA,ALG10B,ANKRD49,APEH,APOD,ARHGDIA,ARMCX4,ATM,B3GNT5,BAG6,BTAF1,C15orf39,C7orf50,CAPN12,CAPN2,CD69,CD7,CEP152,CFHR4,CFL1,CHIC1,CLPP,CLTB,CNDP1,COTL1,CREB5,CRNDE,CTSD,CTSW,CTTN,DDIT3,DDX54,DGKH,DNAJC18,DNHD1,DOCK5,DPP9,EDA2R,EEF2,EGR1,ENPP2,EPN1,EZH1,FAH,FAR1,FASN,FLNA,FLOT2,FNBP4,FNDC3A,FURIN,FZD4,GBP3,GNA15,GNG4,GPAA1,GPR63,GRB10,GTP…	191
Antimicrobial Response,Inflammatory Response	Antiviral response	1.79e-05	0.00153			AIM2,APOBEC3H,CCR7,CFL1,FLNA,HSPA8,IFI44,IFI44L,IFIT2,IL23A,MX2,TP53,TRIM22,TRIM56	14
Cancer,Gastrointestinal Disease,Organismal Injury and Abnormalities	Large intestine adenocarcinoma	1.85e-05	0.00155			ACOT7,ACTB,ACTG1,ADAL,ADAM19,ADAM22,ADAM9,ADARB1,AHDC1,AIM2,AKNA,ALG10B,ANKRD49,APEH,APOD,ARHGDIA,ARMCX4,ATM,B3GNT5,BAG6,BTAF1,C15orf39,C7orf50,CAPN12,CAPN2,CD69,CD7,CEP152,CFHR4,CFL1,CHIC1,CLPP,CLTB,CNDP1,COTL1,CREB5,CRNDE,CTSD,CTSW,CTTN,DDIT3,DDX54,DGKH,DNAJC18,DNHD1,DOCK5,DPP9,EDA2R,EEF2,EGR1,ENPP2,EPN1,EZH1,FAH,FAR1,FASN,FLNA,FLOT2,FNBP4,FNDC3A,FURIN,FZD4,GBP3,GNA15,GNG4,GPAA1,GRB10,GTPBP2,H2…	187
Hematological System Development and Function,Immunological Disease,Lymphoid Tissue Structure and Development,Organ Morphology,Organismal Injury and Abnormalities,Tissue Morphology	Abnormal morphology of lymphoid organ	2.07e-05	0.00169			AIM2,ARHGDIA,ATM,B3GNT5,CCR7,CD200,CD80,CTSD,F2R,HOXB9,IL2,IL2RA,LTA,MCL1,MIF,PRDX2,TK1,TNFRSF8,TP53,TSC22D3	20
Cancer,Organismal Injury and Abnormalities,Renal and Urological Disease	Urinary tract cancer	2.37e-05	0.00183			ACOT7,ACTB,ADAL,ADAM19,ADAM22,APOD,ATM,BSG,BTAF1,CEP152,CNDP1,DMTN,DNHD1,EZH1,FAH,FERMT2,FLNA,FNBP4,FURIN,GAS5,GNG4,H2AX,HSD17B7,IGF2BP3,IL2,IL2RA,INPP5F,ITGAV,KLHL15,L3MBTL4,LPAR6,MCL1,MVP,MX2,MXD1,MYADM,MZT2B,NHERF1,NHSL2,OGT,PA2G4,PIGT,PITPNM1,PLAG1,PLCG2,PNISR,PRDX2,PRRC2A,PVT1,RANBP6,RNF19A,RUFY4,SAMD9L,SLC2A1,SLC5A3,SLC7A11,TP53,TRIM22,TUBB,YBX3,YOD1,ZC3H4,ZNF721	63
Cancer,Organismal Injury and Abnormalities	Pelvic cancer	2.55e-05	0.00192			ACOT7,ACTB,ACTG1,ADAM19,ADAM22,ADAM9,AKNA,ALG10B,ANKRD49,APOD,ATM,BAG6,BSG,BTAF1,C5orf24,CAPN12,CAPN2,CCR7,CD69,CD80,CDK2AP2,CEP152,CHIC1,CLEC2D,CLK1,CNDP1,CREB5,CTSD,CTSH,DDIT3,DGKH,DOCK5,DPP9,EEF2,EGR1,ENPP1,ENPP2,EPN1,EZH1,F2R,FAM153A/FAM153B,FASN,FBXO22,FERMT2,FLNA,FNBP4,FNDC3A,FURIN,FZD4,GAS5,GBP3,GNA15,GNG4,GPR63,GRB10,GTPBP2,H2AX,HEG1,HERC5,HIC1,HSD17B7,HSPA8,IFI44,IFI44L,IFIT2,IFRD1,IGF2B…	154
Cancer,Endocrine System Disorders,Organismal Injury and Abnormalities	Thyroid carcinoma	2.7e-05	0.00194			ACOT7,ACTG1,ADAL,ADAM19,ADAM22,ADAM9,ADARB1,ADAT2,AHDC1,AKNA,ALYREF,APOBEC3H,APOD,ARMCX4,ARPC4,ATM,BAG6,BSG,BTAF1,C15orf39,C7orf50,CAPN12,CAPN2,CD200,CD27,CD7,CEP152,CFHR4,CFL1,CHIC1,CLK1,CLPP,CLTB,CNDP1,CTSD,CTSH,CTTN,DDX54,DGKH,DHRS3,DNAJC18,DNHD1,DOCK5,DPP9,EDA2R,EEF2,EGR1,ENPP1,ENPP2,EPN1,EZH1,FAH,FAM118A,FAM153A/FAM153B,FAM8A1,FAR1,FASN,FBXO22,FLNA,FLOT2,FNBP4,FNDC3A,FURIN,FZD4,GBP3,GPAA1,GP…	191
Cellular Assembly and Organization	Clustering of telomeres	3.48e-05	0.00241			ATM,H2AX,TP53	3
Cancer,Endocrine System Disorders,Organismal Injury and Abnormalities	Nonpituitary endocrine tumor	4.64e-05	0.00286			ACOT7,ACTG1,ADAL,ADAM19,ADAM22,ADAM9,ADARB1,ADAT2,AHDC1,AKNA,ALYREF,APOBEC3H,APOD,ARMCX4,ARPC4,ATM,BAG6,BSG,BTAF1,C15orf39,C7orf50,CAPN12,CAPN2,CD200,CD27,CD7,CEP152,CFHR4,CFL1,CHIC1,CLK1,CLPP,CLTB,CNDP1,CTSD,CTSH,CTTN,DDX54,DGKH,DHRS3,DNAJC18,DNHD1,DOCK5,DPP9,EDA2R,EEF2,EGR1,ENPP1,ENPP2,EPN1,EZH1,FAH,FAM118A,FAM153A/FAM153B,FAM8A1,FAR1,FASN,FBXO22,FLNA,FLOT2,FNBP4,FNDC3A,FURIN,FZD4,GBP3,GPAA1,GP…	192
Cancer,Organismal Injury and Abnormalities	Neck neoplasm	5.05e-05	0.00309			ACOT7,ACTG1,ADAL,ADAM19,ADAM22,ADAM9,ADARB1,ADAT2,AHDC1,AKNA,ALYREF,APOBEC3H,APOD,ARMCX4,ARPC4,ATM,BAG6,BSG,BTAF1,C15orf39,C7orf50,CAPN12,CAPN2,CD200,CD27,CD7,CEP152,CFHR4,CFL1,CHIC1,CLK1,CLPP,CLTB,CNDP1,CTSD,CTSH,CTTN,DDX54,DGKH,DHRS3,DNAJC18,DNHD1,DOCK5,DPP9,EDA2R,EEF2,EGR1,ENPP1,ENPP2,EPN1,EZH1,FAH,FAM118A,FAM153A/FAM153B,FAM8A1,FAR1,FASN,FBXO22,FLNA,FLOT2,FNBP4,FNDC3A,FURIN,FZD4,GBP3,GPAA1,GP…	192
Cell-To-Cell Signaling and Interaction,Inflammatory Response	Immune response of cytotoxic T cells	6.04e-05	0.00353			CCR7,IL2,TAPBP	3
Cancer,Organismal Injury and Abnormalities,Renal and Urological Disease	Bladder carcinoma	7.04e-05	0.00398			ACTB,ADAM19,ADAM22,APOD,ATM,BTAF1,CEP152,EZH1,FERMT2,FNBP4,FURIN,GNG4,H2AX,HSD17B7,IGF2BP3,INPP5F,ITGAV,KLHL15,L3MBTL4,LPAR6,MCL1,MVP,MX2,MYADM,MZT2B,OGT,PA2G4,PITPNM1,PLAG1,PLCG2,PRRC2A,RANBP6,RNF19A,SLC2A1,TP53,TUBB,ZC3H4,ZNF721	38
Connective Tissue Disorders,Immunological Disease,Inflammatory Disease,Inflammatory Response,Organismal Injury and Abnormalities,Renal and Urological Disease,Skeletal and Muscular Disorders	Systemic lupus erythematosus nephritis	7.16e-05	0.00401			CD80,HERC5,IFI44,LINC-PINT,PARP12	5
Cancer,Organismal Injury and Abnormalities	Malignant neoplasm of retroperitoneum	8.91e-05	0.00451			ACOT7,ACTB,ADAL,ADAM19,ADAM22,ADAM9,AIM2,ANKRD49,APOBEC3H,APOD,ARMCX4,ATM,BSG,BTAF1,CAPN2,CCR7,CD7,CLK1,CNDP1,CTSD,CTTN,DMTN,DNHD1,DOCK5,EGR1,ENPP2,EZH1,FAH,FASN,FLNA,GRB10,H2AX,HEG1,HERC5,HSD17B7,IGF2BP3,IL2,IL2RA,ITGAE,ITGAV,KCTD7,MCL1,MIF,MXD1,MYADM,NHERF1,NHSL2,NORAD,OGT,OTOF,PA2G4,PAN2,PFN1,PIGT,PITPNM1,PLCG2,PLEKHH2,PNISR,PRDX2,PRR12,PRRC2A,PVT1,RUFY4,SAMD9L,SLC25A39,SLC5A3,SLC7A11,SPEF2,SY…	83
Connective Tissue Disorders,Organismal Injury and Abnormalities,Skeletal and Muscular Disorders	Non-traumatic arthropathy	0.000105	0.00513			ADAM9,AIM2,ATM,BAG6,CCR7,CD69,CD80,CEBPG,CXCL5,DMTN,EEF2,FURIN,GAS5,GRB10,HSPA8,IL2,IL2RA,L3MBTL4,LTA,MCL1,MIF,PRDX2,PRRC2A,RAB1B,SAMD9L,SLC7A11,TAPBP,TLE3,TNFRSF10B,TP53,TRIM28,ZNF331	32
Immunological Disease	Abnormal morphology of immune system	0.000142	0.00665			ATM,B3GNT5,CD200,CD80,CTSD,EGR1,IL2,IL2RA,LSP1,LTA,MCL1,MXD1,PIK3AP1,PLCG2,TP53	15
Cell Cycle	G1 checkpoint of tumor cell lines	0.000148	0.00669			ATM,TP53	2
Carbohydrate Metabolism,Molecular Transport,Small Molecule Biochemistry	Export of lactic acid	0.000148	0.00669			BSG,TP53	2
Cell Cycle	G1 phase of lymphoblastoid cell lines	0.000148	0.00669			ATM,TP53	2
Connective Tissue Disorders,Developmental Disorder,Hereditary Disorder,Ophthalmic Disease,Organismal Injury and Abnormalities,Skeletal and Muscular Disorders	Baraitser-Winter syndrome	0.000148	0.00669			ACTB,ACTG1	2
Molecular Transport	Import of DNA	0.000148	0.00669			HSPA8,IL2	2
Hematological System Development and Function,Lymphoid Tissue Structure and Development,Organ Morphology,Tissue Morphology	Morphology of lymphoid organ	0.000151	0.00674			AIM2,ARHGDIA,ATM,B3GNT5,CCR7,CD200,CD80,CTSD,EGR1,F2R,HOXB9,IL2,IL2RA,LTA,MCL1,MIF,PRDX2,TK1,TNFRSF8,TP53,TSC22D3	21
Hematological System Development and Function,Immunological Disease,Lymphoid Tissue Structure and Development,Organ Morphology,Organismal Development,Organismal Injury and Abnormalities,Tissue Morphology	Abnormal morphology of thymus gland	0.000173	0.00748			ARHGDIA,ATM,CCR7,HOXB9,LTA,MCL1,TNFRSF8,TP53,TSC22D3	9
Cancer,Organismal Injury and Abnormalities,Renal and Urological Disease	Bladder cancer	0.000188	0.00802			ACTB,ADAM19,ADAM22,APOD,ATM,BTAF1,CEP152,EZH1,FERMT2,FNBP4,FURIN,GAS5,GNG4,H2AX,HSD17B7,IGF2BP3,INPP5F,ITGAV,KLHL15,L3MBTL4,LPAR6,MCL1,MVP,MX2,MYADM,MZT2B,OGT,PA2G4,PITPNM1,PLAG1,PLCG2,PRRC2A,RANBP6,RNF19A,SLC2A1,TP53,TUBB,ZC3H4,ZNF721	39
Cellular Function and Maintenance,Hematological System Development and Function	Function of CD4+ T-lymphocytes	0.000195	0.00822			CD27,CD69,CD80,IL2,IL23A,SLC2A1	6
Cancer,Organismal Injury and Abnormalities	Eradication of tumor	0.000201	0.00843			CD200,IL2RA,TP53	3
Connective Tissue Disorders,Dermatological Diseases and Conditions,Inflammatory Disease,Inflammatory Response,Organismal Injury and Abnormalities,Skeletal and Muscular Disorders	Psoriatic arthritis	0.000225	0.00918			CD27,CD80,CDK2AP2,IL23A,LTA,TCF7,TP53	7
Cancer,Dermatological Diseases and Conditions,Hematological Disease,Immunological Disease,Organismal Injury and Abnormalities	Cutaneous T-cell lymphoma	0.000231	0.0092			CCR7,CD7,IFI44,IL2,IL2RA,MCL1,TNFRSF8,TP53	8
Cancer,Gastrointestinal Disease,Organismal Injury and Abnormalities	Upper gastrointestinal tract tumor	0.000231	0.0092			ADAL,ADAM22,ADAM9,ADARB1,AIM2,ALYREF,ATM,BSG,BTAF1,C7orf50,CAPN12,CCR7,CD7,CFHR4,CRNDE,CTSH,CTTN,DGKH,DNHD1,DOCK5,EEF2,ENPP2,FASN,FLNA,FNBP4,FNDC3A,FZD4,GAS5,GBP3,GNA15,GPR63,HEG1,HOXB9,IFIT2,IGF2BP3,IGIP,IL2RA,INPP5F,ITGAV,KIF1A,LSP1,LUC7L3,MCL1,MIF,MTURN,ORMDL1,OTOF,PA2G4,PAN2,PLAG1,PNISR,PNN,PPFIBP1,PRRC2A,PVT1,RASGRP3,RNPC3,SAT1,SLC25A39,SLC25A6,SLC7A11,SPEF2,TLE3,TP53,TP53INP1,TRAPPC9,TRERF1…	78
Neurological Disease	Progressive neurological disorder	0.000232	0.0092			ACTB,ACTG1,APOD,BAG6,BSG,CAPN2,CTSD,DDIT3,EEF2,EGR1,FASN,FURIN,IL2,IL2RA,ITGAV,KCTD7,KIF1A,MIF,MT-CO1,MZT2B,NFATC4,OGT,PARP15,PFN1,PLCG2,PRDX2,PRRC2A,SLC16A3,SLC25A6,SLC2A1,TP53,TRIM22,TUBA1B,TUBB,ZNF721	35
Immunological Disease,Organismal Injury and Abnormalities	Abnormality of thymus gland	0.000258	0.01			ARHGDIA,ATM,CCR7,EGR1,HOXB9,LTA,MCL1,TNFRSF8,TP53,TSC22D3	10
Digestive System Development and Function,Gastrointestinal Disease,Organ Morphology,Organismal Development,Organismal Injury and Abnormalities	Abnormal morphology of salivary gland	0.000261	0.0101			CCR7,IL2,IL2RA,TK1	4
Cancer,Gastrointestinal Disease,Hepatic System Disease,Organismal Injury and Abnormalities	Hepatitis C virus-related hepatocellular carcinoma	0.000261	0.0101			EEF2,FAH,HSPA8,TUBB	4
Dermatological Diseases and Conditions,Organismal Injury and Abnormalities	Psoriasis	0.000282	0.0107			APOD,ARHGDIA,CD7,CFL1,CXCL5,EGR1,FASN,GNA15,H2AX,HSPA8,IFI44,IFI44L,IL23A,IL2RA,ITGAE,LTA,MIF,SLAMF7,SRM,TLE3,TRIM22,TUBB	22
Cancer,Hematological Disease,Immunological Disease,Organismal Injury and Abnormalities	Lymphocytic leukemia	0.000314	0.0114			ACTG1,ADAM22,ATM,CCR7,CD200,CD27,CD7,CD80,CFL1,CNDP1,CTTN,ENPP1,F2R,H2AX,HSPA8,IL2,IL2RA,ITGAE,MCL1,MIF,PLCG2,SLC2A1,SMAD5,TCF7,TNFRSF8,TP53,TRAPPC9	27
Developmental Disorder,Embryonic Development,Organismal Development,Tissue Morphology	Lack of vitelline vessel	0.000318	0.0114			ENPP2,F2R,FURIN,HSD17B7,SMAD5	5
Cancer,Gastrointestinal Disease,Organismal Injury and Abnormalities	Upper gastrointestinal tract cancer	0.00032	0.0114			ADAL,ADAM22,ADAM9,ADARB1,AIM2,ATM,BSG,BTAF1,C7orf50,CAPN12,CCR7,CD7,CFHR4,CRNDE,CTSH,CTTN,DGKH,DNHD1,DOCK5,EEF2,ENPP2,FASN,FLNA,FNBP4,FNDC3A,FZD4,GAS5,GBP3,GNA15,GPR63,HEG1,HOXB9,IFIT2,IGF2BP3,IGIP,IL2RA,INPP5F,ITGAV,KIF1A,LSP1,LUC7L3,MCL1,MIF,MTURN,ORMDL1,OTOF,PA2G4,PAN2,PLAG1,PNISR,PNN,PPFIBP1,PRRC2A,PVT1,RASGRP3,RNPC3,SAT1,SLC25A39,SLC25A6,SLC7A11,SPEF2,TLE3,TP53,TP53INP1,TRAPPC9,TRERF1,TRIM22…	77
Infectious Diseases	Infection by mycobacteria	0.000323	0.0115			CCR7,CD27,IFI44,IFI44L,IFIT2,IL2RA,LTA,MIF,RHEBL1,RPLP0P2	10
Cancer,Organismal Injury and Abnormalities	Genitourinary adenocarcinoma	0.000332	0.0116			ACOT7,ACTG1,ADAL,ADAM19,ADAM9,AKNA,ALG10B,APOD,ATM,BAG6,BSG,BTAF1,C5orf24,CAPN12,CAPN2,CD80,CDK2AP2,CEP152,CHIC1,CLEC2D,CLK1,CNDP1,CREB5,CTSD,DDIT3,DGKH,DMTN,DNHD1,DOCK5,DPP9,EEF2,ENPP1,ENPP2,EPN1,EZH1,F2R,FAM153A/FAM153B,FASN,FBXO22,FERMT2,FLNA,FNDC3A,FZD4,GBP3,GPR63,GRB10,GTPBP2,H2AX,HEG1,HERC5,HIC1,HSD17B7,HSPA8,IFI44,IFI44L,IFIT2,IFRD1,IGF2BP3,IL2,IL2RA,ITGAE,ITGAV,KIF18B,KIF1A,L3MBTL4,LMOD3,…	134
DNA Replication, Recombination, and Repair	Delay in repair of DNA	0.000363	0.0123			ATM,H2AX,TP53	3
Nervous System Development and Function	Protection of cortical neurons	0.000363	0.0123			CAPN2,DDIT3,NFATC4	3
Cell Cycle	Arrest in meiosis	0.000382	0.0126			ATM,BSG,CPEB1,H2AX,TP53,TSC22D3	6
Cell-To-Cell Signaling and Interaction,Hematological System Development and Function,Immune Cell Trafficking,Inflammatory Response	Aggregation of lymphocytes	0.000403	0.0132			IL2,LTA,TNFRSF8,TP53	4
Cell Cycle,Embryonic Development	Re-entry into cell cycle progression of embryonic cell lines	0.00044	0.0136			MXD1,TP53	2
Auditory Disease,Neurological Disease	Progressive high frequency hearing impairment	0.00044	0.0136			ACTB,ACTG1	2
Cancer,Hematological Disease,Organismal Injury and Abnormalities	Hematologic cancer of tumor cell lines	0.00044	0.0136			ENPP2,TP53	2
Cell Death and Survival	Killing of epithelial cell lines	0.00044	0.0136			ITGAE,TP53	2
Cancer,Hematological Disease,Immunological Disease,Organismal Injury and Abnormalities	Large-cell follicular lymphoma	0.00044	0.0136			MCL1,TP53	2
Cellular Development,Cellular Growth and Proliferation,Embryonic Development,Hematological System Development and Function,Hematopoiesis,Humoral Immune Response,Lymphoid Tissue Structure and Development,Organ Development,Organismal Development,Tissue Development	Arrest in lymphopoiesis of pre-B lymphocytes	0.00044	0.0136			IL2RA,PLCG2	2
Cell Cycle	Arrest in cell cycle progression of thymocytes	0.00044	0.0136			ATM,TP53	2
Digestive System Development and Function,Gastrointestinal Disease,Organ Morphology,Organismal Development,Organismal Injury and Abnormalities	Abnormal morphology of salivary duct	0.00044	0.0136			IL2,IL2RA	2
Cardiovascular System Development and Function,Cell Morphology	Contraction of vascular endothelial cells	0.00044	0.0136			F2R,LPAR6	2
Cell Death and Survival,Connective Tissue Development and Function	Survival of synovial fibroblasts	0.00044	0.0136			MIF,TP53	2
Cell Morphology	Morphology of leukocytes	0.000459	0.0141			ATM,B3GNT5,CCR7,CD200,CD80,CTSD,EGR1,IL2,IL2RA,LTA,MCL1,MXD1,PIK3AP1,PLCG2,TP53	15
Endocrine System Disorders,Gastrointestinal Disease,Inflammatory Disease,Inflammatory Response,Organismal Injury and Abnormalities	Chronic pancreatitis	0.000461	0.0141			COTL1,CTSD,DDIT3,PRDX2,TP53INP1	5
Cellular Compromise,DNA Replication, Recombination, and Repair	Breakdown of chromosomes	0.000467	0.0141			ATM,H2AX,TP53	3
Gastrointestinal Disease,Inflammatory Disease,Inflammatory Response,Organismal Injury and Abnormalities	Severe enteritis	0.000467	0.0141			CCR7,CD80,IL23A	3
Inflammatory Response,Ophthalmic Disease,Organismal Injury and Abnormalities	Inflammation of lacrimal gland	0.000467	0.0141			CCR7,IL2,IL2RA	3
Endocrine System Disorders,Organismal Injury and Abnormalities	Benign thyroid disease	0.000539	0.0157			ARHGDIA,CAPN2,CCR7,CD7,CD80,HSPA8,IL2,PRDX2,PRKAB2	9
Cancer,Organismal Injury and Abnormalities,Tissue Morphology,Tumor Morphology	Morphology of tumor	0.000556	0.016			CRNDE,EGR1,F2R,FURIN,IL2,LSP1,LTA,MIF,PRDX2,PVT1,TP53	11
Cellular Assembly and Organization	Stabilization of actin filaments	0.000589	0.0168			CFL1,CTTN,FLNA	3
Cell Morphology	Morphology of blood cells	0.000631	0.0175			ATM,B3GNT5,CCR7,CD200,CD80,CTSD,DMTN,EGR1,F2R,IL2,IL2RA,LTA,MCL1,MXD1,PIK3AP1,PLCG2,PRDX2,TP53	18
Cancer,Organismal Injury and Abnormalities,Renal and Urological Disease	Kidney carcinoma	0.000748	0.0203			ACOT7,ADAL,ADAM19,APOD,ATM,BSG,BTAF1,CNDP1,DMTN,DNHD1,FAH,FLNA,HSD17B7,IGF2BP3,IL2,IL2RA,MXD1,NHERF1,NHSL2,OGT,PIGT,PLCG2,PNISR,PRDX2,PRRC2A,PVT1,RUFY4,SAMD9L,SLC5A3,SLC7A11,TP53,TRIM22,TUBB,YBX3,YOD1	35
Organismal Development,Organismal Injury and Abnormalities	Abnormal morphology of thoracic cavity	0.000767	0.0206			ADAM19,ADAM9,ARHGDIA,ATM,CAPN2,CCR7,CD69,CEBPG,CTSD,DHRS3,EPN1,F2R,FASN,FLNA,HEXIM1,HOXB9,HSD17B7,IL23A,IL2RA,INPP5F,ITGAV,LIMS2,LTA,MCL1,MIF,NFATC4,PFN1,TK1,TNFRSF8,TP53,TSC22D3	31
Cellular Assembly and Organization,Cellular Movement,Nervous System Development and Function	Transport of synaptic vesicles	0.000773	0.0207			ACTB,ACTG1,EPN1,HSPA8,KIF1A,OTOF	6
Hematological Disease,Immunological Disease	Post-transplant lymphoproliferative disorder	0.000818	0.0218			ATM,CD7,IL2RA,TNFRSF8,TP53	5
Dermatological Diseases and Conditions,Hematological Disease,Immunological Disease,Organismal Injury and Abnormalities	Lymphoproliferative disorder of the skin	0.000837	0.0221			CCR7,CD7,HIC1,IFI44,IL2,IL2RA,MCL1,TNFRSF8,TP53	9
Cancer,Hematological Disease,Immunological Disease,Organismal Injury and Abnormalities	T cell lymphomagenesis	0.000873	0.0222			ATM,TP53	2
Cardiovascular Disease	Calcification of tunica media	0.000873	0.0222			DDIT3,ENPP1	2
Cell Death and Survival	Killing of bone cancer cell lines	0.000873	0.0222			BAG6,TP53	2
Amino Acid Metabolism,Small Molecule Biochemistry	Exchange of acidic amino acid	0.000873	0.0222			SLC7A11,UCP2	2
Cellular Movement,Immune Cell Trafficking	Redistribution of leukocytes	0.000873	0.0222			CCR7,MIF	2
Cell-To-Cell Signaling and Interaction,Hematological System Development and Function,Humoral Immune Response,Immune Cell Trafficking,Inflammatory Response	Activation of peripheral B lymphocytes	0.000873	0.0222			CLEC2D,IL2	2
Organismal Injury and Abnormalities,Respiratory Disease	Lesioning of lung	0.000873	0.0222			IL2,TP53	2
Cellular Response to Therapeutics	Radiosensitivity of fibroblasts	0.000873	0.0222			H2AX,TP53	2
Endocrine System Disorders,Inflammatory Response,Organismal Injury and Abnormalities	Inflammation of thyroid gland	0.000873	0.0222			CCR7,TK1	2
Connective Tissue Disorders,Dermatological Diseases and Conditions,Inflammatory Disease,Inflammatory Response,Organismal Injury and Abnormalities,Skeletal and Muscular Disorders	Active stage psoriatic arthritis	0.000891	0.0225			CD80,IL23A,LTA	3
Cell Death and Survival	Cytolysis of blood cells	0.000952	0.0235			CD7,CEBPG,DMTN,IL2,PLCG2,SLAMF7,TAPBP	7
Cardiovascular Disease,Cardiovascular System Development and Function,Organismal Injury and Abnormalities,Tissue Morphology	Abnormal morphology of blood vessel	0.000962	0.0236			ARHGDIA,CTTN,ENPP1,ENPP2,EPN1,F2R,FLNA,FURIN,HSD17B7,ITGAV,NFATC4,SMAD5	12
Hematological System Development and Function,Immunological Disease,Lymphoid Tissue Structure and Development,Organ Morphology,Organismal Development,Organismal Injury and Abnormalities,Tissue Morphology	Abnormal morphology of mesenteric lymph node	0.00104	0.025			ARHGDIA,F2R,IL2,LTA	4
Cell Morphology,Immunological Disease	Abnormal morphology of leukocytes	0.00105	0.0251			ATM,B3GNT5,CD80,EGR1,IL2,IL2RA,LTA,MCL1,MXD1,PIK3AP1,TP53	11
Infectious Diseases	Replication of Murine herpesvirus 4	0.00107	0.0252			DDIT3,MX2,PARP12	3
Cellular Development,Cellular Growth and Proliferation,Hematological System Development and Function,Lymphoid Tissue Structure and Development	Expansion of memory T lymphocytes	0.00107	0.0252			IL2,IL23A,IL2RA	3
Gastrointestinal Disease,Organismal Injury and Abnormalities	Bleeding of intestine	0.00107	0.0252			IL2,ITGAV,MIF	3
Cell Death and Survival	Cytolysis of lymphocytes	0.00109	0.0255			CD7,CEBPG,IL2,PLCG2,SLAMF7,TAPBP	6
Cancer,Organismal Injury and Abnormalities,Renal and Urological Disease	Renal cell carcinoma	0.00111	0.0258			ACOT7,ADAL,ADAM19,APOD,ATM,BSG,BTAF1,CNDP1,DMTN,DNHD1,FLNA,HSD17B7,IGF2BP3,IL2,IL2RA,MXD1,NHERF1,NHSL2,OGT,PIGT,PLCG2,PNISR,PRDX2,PRRC2A,PVT1,RUFY4,SAMD9L,SLC5A3,SLC7A11,TP53,TRIM22,TUBB,YBX3,YOD1	34
Hematological Disease,Immunological Disease	B-cell chronic lymphoproliferative disorder	0.00114	0.0259			ATM,CD200,CD80,CFL1,CNDP1,CTTN,ENPP1,H2AX,IL2,IL2RA,ITGAE,MCL1,MIF,PLCG2,SMAD5,TP53,TRAPPC9	17
Developmental Disorder,Embryonic Development,Organismal Development,Tissue Morphology	Abnormal morphology of vitelline vessel	0.00114	0.0259			ENPP2,F2R,FURIN,HSD17B7,ITGAV,NFATC4,SMAD5	7
Nervous System Development and Function	Neuroprotection of brain	0.00115	0.0259			CAPN2,DDIT3,DGKH,NFATC4	4
Cancer,Gastrointestinal Disease,Organismal Injury and Abnormalities	Colorectal adenocarcinoma	0.00115	0.0259			ACTG1,ADAL,ADAM19,ADARB1,AHDC1,AIM2,ALG10B,ANKRD49,APEH,APOD,ARHGDIA,ATM,BAG6,C7orf50,CAPN12,CD69,CD7,CLPP,CLTB,CNDP1,CRNDE,DDIT3,DDX54,DNHD1,DOCK5,EGR1,EPN1,FAH,FAR1,FASN,FLNA,FNBP4,FNDC3A,GBP3,GNG4,H2AX,HEG1,HOXB9,IFI44L,IGF2BP3,IL2RA,INPP5F,ITGAE,ITGAV,KIF1A,L3MBTL4,LIMS2,LMOD3,MCL1,MREG,MTURN,NFATC4,NHSL2,NUCB2,OTOF,PDP2,PIK3AP1,PITPNM1,PLCG2,PLEKHH2,PNISR,POLD2,PPFIBP1,PRRC2A,RANBP6,RAVER1,R…	102
Cancer,Hematological Disease,Immunological Disease,Organismal Injury and Abnormalities	Follicular B-cell or T-cell lymphoma	0.00119	0.0267			ATM,IL2,IL2RA,LTA,MCL1,PLCG2,TP53	7
Cancer,Hematological Disease,Immunological Disease,Organismal Injury and Abnormalities	Chronic form of lymphocytic leukemia	0.0012	0.0267			ATM,CD200,CD80,CFL1,CNDP1,CTTN,ENPP1,H2AX,IL2,IL2RA,ITGAE,MCL1,MIF,PLCG2,SMAD5,TP53,TRAPPC9	17
Infectious Diseases	Tuberculosis	0.00122	0.027			CCR7,CD27,IFI44,IFI44L,IFIT2,IL2RA,MIF,RHEBL1,RPLP0P2	9
Endocrine System Disorders,Organismal Injury and Abnormalities	Benign thyroid nodule	0.00127	0.0279			ARHGDIA,CAPN2,HSPA8,PRDX2	4
Cell Death and Survival,Neurological Disease,Organismal Injury and Abnormalities	Cell death of pyramidal neurons	0.00127	0.0279			PPP1R9B,TP53,UCP2	3
Cardiovascular Disease,Inflammatory Disease,Organismal Injury and Abnormalities	Vasculitis	0.00128	0.0279			CD80,IL2,IL2RA,LTA,TK1,TP53	6
Cellular Assembly and Organization	Organization of cellular membrane	0.00129	0.0281			ACTB,ACTG1,ARPC4,CFL1,CLTB,CTTN,EPN1,FLNA,FZD4,HSPA8,SLC7A11,TUBB	12
Antimicrobial Response,Inflammatory Response	Antimicrobial response	0.00135	0.0289			AIM2,APOBEC3H,CCR7,CFL1,COTL1,FLNA,HSPA8,IFI44,IFI44L,IFIT2,IL23A,MX2,TP53,TRIM22,TRIM56	15
Cancer,Organismal Injury and Abnormalities,Reproductive System Disease,Tumor Morphology	Metastatic breast cancer	0.00136	0.0289			CCR7,CPEB1,FLNA,KLF8,TNFRSF10B,TP53,TUBB	7
Cancer,Cell Death and Survival,Organismal Injury and Abnormalities,Tumor Morphology	Apoptosis of chronic lymphocytic leukemia cells	0.0014	0.029			ATM,MIF,TNFRSF10B,TP53	4
Amino Acid Metabolism,Small Molecule Biochemistry	Exchange of L-amino acid	0.00144	0.029			SLC7A11,UCP2	2
Cancer,Organismal Injury and Abnormalities,Reproductive System Disease	Growth of breast adenocarcinoma	0.00144	0.029			CD80,TP53	2
Gastrointestinal Disease,Immunological Disease,Inflammatory Disease,Inflammatory Response,Organismal Injury and Abnormalities	Autoimmune metaplastic atrophic gastritis	0.00144	0.029			IL2,IL2RA	2
Cell Cycle,Connective Tissue Development and Function,DNA Replication, Recombination, and Repair	Checkpoint control of fibroblasts	0.00144	0.029			ATM,TP53	2
Cancer,Hematological Disease,Immunological Disease,Organismal Injury and Abnormalities,Tumor Morphology	Regression of lymphoma	0.00144	0.029			IL2,TP53	2
DNA Replication, Recombination, and Repair	Delay in double-stranded DNA break repair	0.00144	0.029			ATM,H2AX	2
Cancer,Hematological Disease,Immunological Disease,Organismal Injury and Abnormalities	Newly diagnosed chronic lymphocytic leukemia	0.00144	0.029			ATM,TP53	2
Cell Cycle,Cellular Movement	Late cytokinesis	0.00144	0.029			PFN1,SEPTIN9	2
Cell Death and Survival	Killing of sarcoma cell lines	0.00144	0.029			BAG6,TP53	2
Cell Cycle	Aneuploidy of thymocytes	0.00144	0.029			ATM,TP53	2
Cancer,Gastrointestinal Disease,Organismal Injury and Abnormalities	Upper gastrointestinal carcinoma	0.00145	0.0291			ADAL,ADAM22,ADAM9,ADARB1,AIM2,ATM,BTAF1,C7orf50,CAPN12,CCR7,CD7,CFHR4,CTSH,CTTN,DGKH,DNHD1,DOCK5,EEF2,ENPP2,FASN,FLNA,FNBP4,FNDC3A,GAS5,GBP3,GNA15,GPR63,HEG1,HOXB9,IGF2BP3,IGIP,IL2RA,INPP5F,ITGAV,KIF1A,LSP1,LUC7L3,MIF,MTURN,ORMDL1,OTOF,PA2G4,PAN2,PLAG1,PNISR,PNN,PPFIBP1,PRRC2A,PVT1,RASGRP3,RNPC3,SLC25A39,SLC25A6,SLC7A11,SPEF2,TLE3,TP53,TP53INP1,TRAPPC9,TRERF1,TRIM22,TRPC4AP,UBN2,ZBTB20,ZC3H4,ZDBF…	71
Organismal Development	Morphology of body cavity	0.00146	0.0292			ADAM19,ADAM9,AIM2,ARHGDIA,ATM,B3GNT5,BAG6,BSG,CAPN2,CCR7,CD69,CD80,CEBPG,CPEB1,CTSD,DHRS3,EGR1,EPN1,F2R,FAH,FASN,FLNA,HEXIM1,HOXB9,HSD17B7,IFRD1,IL2,IL23A,IL2RA,INPP5F,ITGAV,LIMS2,LTA,MCL1,MIF,MZB1,NFATC4,NHERF1,NUCB2,PFN1,PRDX2,SAT1,STARD4,TK1,TNFRSF8,TP53,TP53INP1,TSC22D3,YOD1	49
Small Molecule Biochemistry	Metabolism of polyamines	0.0015	0.0297			MAF1,SAT1,SRM	3
Cardiovascular Disease,Cardiovascular System Development and Function,Organ Morphology,Organismal Development,Organismal Injury and Abnormalities	Abnormal morphology of dilated heart	0.0015	0.0297			FLNA,HSD17B7,NFATC4	3
Cell Death and Survival,Hematological System Development and Function	Cell viability of thymocytes	0.00168	0.0319			ATM,IL2,MCL1,TCF7	4
Cardiovascular Disease,Cell Death and Survival,Connective Tissue Disorders,Hematological Disease,Organismal Injury and Abnormalities	Hemolytic anemia	0.00174	0.0326			CCR7,CD69,IL2,IL2RA,LPAR6,PIGT,PRDX2	7
Cancer,Organismal Injury and Abnormalities,Reproductive System Disease	Growth of breast carcinoma	0.00175	0.0326			ATM,CD80,TP53	3
Connective Tissue Disorders,Immunological Disease,Inflammatory Disease,Inflammatory Response,Organismal Injury and Abnormalities,Skeletal and Muscular Disorders	Polyarticular juvenile rheumatoid arthritis	0.00182	0.0336			CD69,CD80,EEF2,LTA,MCL1,TLE3	6
Cancer,Gastrointestinal Disease,Hereditary Disorder,Organismal Injury and Abnormalities	Familial colorectal cancer	0.00183	0.0336			ATM,MT-CO1,TP53,TRIM28	4
Cellular Assembly and Organization,Cellular Function and Maintenance,Cellular Movement,Nervous System Development and Function	Endocytosis of synaptic vesicles	0.00183	0.0336			ACTB,ACTG1,EPN1,HSPA8	4
Cardiovascular Disease,Cardiovascular System Development and Function	Abnormal morphology of cardiovascular system	0.0019	0.0347			ADAM19,ADAM9,ARHGDIA,CAPN2,CD69,CTSD,CTTN,DHRS3,ENPP1,ENPP2,EPN1,F2R,FASN,FLNA,FURIN,HEXIM1,HSD17B7,IL23A,IL2RA,INPP5F,ITGAV,LIMS2,MCL1,MIF,NFATC4,PFN1,SMAD5,TP53	28
Organismal Development	Abnormal morphology of body cavity	0.00193	0.035			ADAM19,ADAM9,AIM2,ARHGDIA,ATM,B3GNT5,BAG6,BSG,CAPN2,CCR7,CD69,CD80,CEBPG,CPEB1,CTSD,DHRS3,EGR1,EPN1,F2R,FAH,FASN,FLNA,HEXIM1,HOXB9,HSD17B7,IL2,IL23A,IL2RA,INPP5F,ITGAV,LIMS2,LTA,MCL1,MIF,NFATC4,NHERF1,PFN1,PRDX2,TK1,TNFRSF8,TP53,TP53INP1,TSC22D3,YOD1	44
Cardiovascular Disease,Cell Death and Survival,Connective Tissue Disorders,Hematological Disease,Organismal Injury and Abnormalities	Paroxysmal nocturnal hemoglobinuria	0.00199	0.036			CCR7,CD69,LPAR6,PIGT	4
Hematological System Development and Function,Immunological Disease,Lymphoid Tissue Structure and Development,Organ Morphology,Organismal Injury and Abnormalities,Tissue Morphology	Abnormal morphology of lymph node cortex	0.00202	0.0361			ARHGDIA,CCR7,CD80	3
Cell-mediated Immune Response,Cellular Development,Cellular Function and Maintenance,Cellular Growth and Proliferation,Embryonic Development,Hematological System Development and Function,Hematopoiesis,Lymphoid Tissue Structure and Development,Organ Development,Organismal Development,Tissue Development	Differentiation of cytotoxic T cells	0.00202	0.0361			IL2,IL2RA,SLC2A1	3
Cell Cycle	Arrest in G2 phase of lung cancer cell lines	0.00202	0.0361			ATM,SNHG1,TP53	3
Cell-To-Cell Signaling and Interaction,Hematological System Development and Function,Immune Cell Trafficking,Inflammatory Response	Aggregation of T lymphocytes	0.00202	0.0361			IL2,LTA,TNFRSF8	3
Cancer,Cardiovascular System Development and Function,Organismal Injury and Abnormalities,Tumor Morphology	Vascularization of tumor	0.0021	0.0365			H2AX,HEXIM1,HTATIP2,IL2,TP53	5
Cancer,Organismal Injury and Abnormalities,Renal and Urological Disease	Renal cancer	0.00211	0.0365			ACOT7,ACTB,ADAL,ADAM19,APOD,ATM,BSG,BTAF1,CNDP1,DMTN,DNHD1,FAH,FLNA,HSD17B7,IGF2BP3,IL2,IL2RA,MXD1,NHERF1,NHSL2,OGT,PIGT,PLCG2,PNISR,PRDX2,PRRC2A,PVT1,RUFY4,SAMD9L,SLC5A3,SLC7A11,TP53,TRIM22,TUBB,YBX3,YOD1	36
Neurological Disease	Progressive motor neuropathy	0.00213	0.0365			ACTB,APOD,BAG6,BSG,CAPN2,DDIT3,EGR1,FASN,FURIN,IL2,IL2RA,ITGAV,MIF,PFN1,PRDX2,PRRC2A,SLC25A6,TP53,TRIM22,TUBA1B	20
Hematological System Development and Function,Immunological Disease,Lymphoid Tissue Structure and Development,Organ Morphology,Organismal Development,Organismal Injury and Abnormalities,Tissue Morphology	Lack of marginal zone of spleen	0.00215	0.0365			B3GNT5,LTA	2
Cell Morphology	Branching of actin filaments	0.00215	0.0365			CFL1,CTTN	2
Molecular Transport,Small Molecule Biochemistry	Quantity of spermidine	0.00215	0.0365			MAF1,SAT1	2
Cell Cycle	Interphase of bladder cancer cell lines	0.00215	0.0365			ATM,TP53	2
Cell Death and Survival	Apoptosis of schwannoma cell lines	0.00215	0.0365			MXD1,TNFRSF10B	2
Cell Cycle	Arrest in S phase of breast cancer cell lines	0.00215	0.0365			TP53,TSC22D3	2
Cancer,Dermatological Diseases and Conditions,Hematological Disease,Immunological Disease,Inflammatory Disease,Inflammatory Response,Organismal Injury and Abnormalities	Mycosis fungoides/sezary syndrome	0.00215	0.0365			CD7,TNFRSF8	2
Cell Cycle	Arrest in S phase of lymphocytes	0.00215	0.0365			IL2,TP53	2
Molecular Transport,Nucleic Acid Metabolism,Small Molecule Biochemistry	Quantity of NADH	0.00215	0.0365			ATM,UCP2	2
Neurological Disease,Ophthalmic Disease	Degeneration of optic nerve	0.00215	0.0365			TDRD7,TP53	2
Hematological System Development and Function,Immune Cell Trafficking,Inflammatory Response,Tissue Development	Accumulation of gamma-delta T lymphocytes	0.00215	0.0365			IL2,IL23A	2
Cell Cycle,Cell-To-Cell Signaling and Interaction,Cellular Growth and Proliferation	Contact growth inhibition of melanoma cell lines	0.00215	0.0365			TNFRSF10B,TP53	2
Cellular Development,Cellular Growth and Proliferation,Renal and Urological System Development and Function	Arrest in growth of kidney cell lines	0.00215	0.0365			SAT1,TP53	2
Cancer,Organismal Injury and Abnormalities,Tumor Morphology	Progression of malignant tumor	0.0022	0.0371			ATM,CCR7,CPEB1,FLNA,IL2,IL2RA,KLF8,SAT1,TNFRSF10B,TP53,TUBB	11
Cancer,Gastrointestinal Disease,Organismal Injury and Abnormalities	Oral cancer	0.0023	0.0386			ADAM9,BSG,C7orf50,CD7,CTSH,ENPP2,FASN,FNDC3A,GNA15,HEG1,HOXB9,IFIT2,IGIP,IL2RA,LSP1,LUC7L3,MCL1,MIF,ORMDL1,OTOF,PLAG1,PRRC2A,RASGRP3,RNPC3,SAT1,SLC7A11,TLE3,TP53,TP53INP1,TRERF1,UBN2,ZBTB20,ZDHHC21,ZFC3H1	34
Cell Morphology,Cellular Assembly and Organization,Cellular Development,Cellular Function and Maintenance,Cellular Growth and Proliferation,Embryonic Development,Nervous System Development and Function,Neurological Disease,Organismal Development,Tissue Development,Tissue Morphology	Loss of dendritic spines	0.00232	0.0388			CFL1,NFATC4,PFN1	3
Cell Death and Survival	Apoptosis of synovial fibroblasts	0.00232	0.0388			MCL1,TNFRSF10B,TP53	3
Molecular Transport,Protein Synthesis,Protein Trafficking	Localization of protein	0.00235	0.0388			ARHGDIA,BSG,CD200,FLNA,FLOT2,IL2,ITGAV,MIF,MYADM,NHERF1,TP53,TRIM22	12
Cancer,Hematological Disease,Immunological Disease,Organismal Injury and Abnormalities	Growth of lymphoma	0.00235	0.0388			ATM,CD80,MCL1,TP53	4
Metabolic Disease,Organismal Injury and Abnormalities	Disorder of iron metabolism	0.00235	0.0388			PRDX2,SLC7A11,TK1,TP53	4
Hematological System Development and Function,Immunological Disease,Lymphoid Tissue Structure and Development,Organ Morphology,Organismal Development,Organismal Injury and Abnormalities,Tissue Morphology	Abnormal morphology of spleen	0.00242	0.0396			AIM2,ATM,B3GNT5,CCR7,CD80,CTSD,IL2,IL2RA,LTA,MIF,PRDX2,TK1,TP53	13
Cancer,Gastrointestinal Disease,Organismal Injury and Abnormalities	Colon adenocarcinoma	0.00243	0.0397			ACTG1,ADAL,ADAM19,ADARB1,AHDC1,AIM2,ALG10B,ANKRD49,APEH,APOD,ARHGDIA,ATM,BAG6,C7orf50,CAPN12,CD69,CD7,CLPP,CLTB,CNDP1,DDIT3,DDX54,DNHD1,DOCK5,EGR1,EPN1,FAH,FAR1,FASN,FLNA,FNBP4,FNDC3A,GBP3,GNG4,H2AX,HEG1,HOXB9,IFI44L,IGF2BP3,INPP5F,ITGAV,KIF1A,L3MBTL4,LIMS2,LMOD3,MCL1,MREG,MTURN,NFATC4,NHSL2,NUCB2,OTOF,PDP2,PIK3AP1,PITPNM1,PLCG2,PLEKHH2,PNISR,POLD2,PPFIBP1,PRRC2A,RANBP6,RAVER1,RNF19A,RNPC3,RUFY4,…	97
Cancer,Developmental Disorder,Hematological Disease,Immunological Disease,Organismal Injury and Abnormalities	Marginal zone cell lymphoma	0.0025	0.0404			CCR7,CD69,IL2,ITGAE,TP53	5
Cancer,Gastrointestinal Disease,Hepatic System Disease,Organismal Injury and Abnormalities	Hepatitis B virus-related hepatocellular carcinoma	0.00255	0.0406			EEF2,FAH,HSPA8,TUBB	4
Cellular Function and Maintenance,Hematological System Development and Function	Function of cytotoxic T cells	0.00255	0.0406			CD27,IL2,TAGLN2,TAPBP	4
Cell Cycle	Ploidy of hematopoietic progenitor cells	0.00264	0.0414			ATM,IL2,TP53	3
Immunological Disease	ANCA disease	0.00264	0.0414			CD80,IL2RA,LTA	3
Cancer,Organismal Injury and Abnormalities	Onset of formation of tumor	0.00264	0.0414			HTATIP2,MCL1,TP53	3
Cell Cycle,Gene Expression	Binding of C/EBP binding site	0.00264	0.0414			CEBPG,DDIT3,TP53	3
Cellular Function and Maintenance,Hematological System Development and Function,Nervous System Development and Function	Function of microglia	0.00264	0.0414			ATM,CD200,EGR1	3
Organismal Injury and Abnormalities,Reproductive System Disease	Benign pelvic disease	0.00267	0.0416			ACTB,ADARB1,BSG,CTSH,CXCL5,EGR1,ENPP1,EZH1,HSD17B7,IFI44L,IL2,IL2RA,LSP1,MXD1,SAT1,SLC5A3,SMAD5,TK1,TP53,XAF1	20
Cell Signaling,Post-Translational Modification,Protein Synthesis	Assembly of protein-protein complex	0.00287	0.0431			CTTN,DMTN,GPAA1,HSPA8,NHERF1,SLC2A1,TAPBP,TP53,WDR19,XAF1	10
Neurological Disease,Skeletal and Muscular Disorders	Progressive neuromuscular disease	0.00293	0.0431			APOD,BAG6,BSG,DDIT3,EGR1,FURIN,IL2,IL2RA,ITGAV,MIF,PRDX2,PRRC2A,SLC25A6,TP53,TRIM22,TUBA1B	16
Cancer,Hematological Disease,Immunological Disease,Organismal Injury and Abnormalities	Development of large-cell lymphoma	0.00298	0.0431			MCL1,TP53	2
Connective Tissue Disorders,Immunological Disease,Inflammatory Disease,Inflammatory Response,Organismal Injury and Abnormalities,Skeletal and Muscular Disorders	Active stage polyarticular juvenile rheumatoid arthritis	0.00298	0.0431			CD80,LTA	2
Connective Tissue Disorders,Immunological Disease,Inflammatory Disease,Inflammatory Response,Organismal Injury and Abnormalities,Skeletal and Muscular Disorders	Progressive rheumatoid arthritis	0.00298	0.0431			CD80,LTA	2
Cell Death and Survival,Neurological Disease,Organismal Injury and Abnormalities	Apoptosis of pyramidal neurons	0.00298	0.0431			PPP1R9B,TP53	2
Organismal Functions	Turning of rodents	0.00298	0.0431			FURIN,SMAD5	2
Cellular Assembly and Organization	Binding of actin cytoskeleton	0.00298	0.0431			FLNA,NHERF1	2
Cancer,Dermatological Diseases and Conditions,Hematological Disease,Immunological Disease,Organismal Injury and Abnormalities	Relapsed cutaneous T-cell lymphoma	0.00298	0.0431			IL2RA,TNFRSF8	2
Developmental Disorder,Hereditary Disorder,Immunological Disease,Metabolic Disease,Organismal Injury and Abnormalities	Bare lymphocyte syndrome	0.00298	0.0431			RFXAP,TAPBP	2
Cellular Compromise	Degradation of cellular membrane	0.00298	0.0431			DMTN,TP53	2
Cell-To-Cell Signaling and Interaction,Hematological System Development and Function,Inflammatory Response	Antibody response of lymphocytes	0.00298	0.0431			CD80,IL2RA	2
Cancer,Organismal Injury and Abnormalities	Neoplasia of leukemia cell lines	0.00298	0.0431			EGR1,TP53	2
Embryonic Development,Hematological System Development and Function,Lymphoid Tissue Structure and Development,Organ Development,Organismal Development,Tissue Development	Organogenesis of lymphoid organ	0.00298	0.0431			CCR7,LTA	2
Cancer,Organismal Injury and Abnormalities,Respiratory Disease	Adenocarcinoma in left upper lobe of lung	0.00298	0.0431			ATM,TP53	2
Cell Cycle,Reproductive System Development and Function	Mitosis of breast cell lines	0.00298	0.0431			SEPTIN9,TP53	2
Cancer,Hematological Disease,Organismal Injury and Abnormalities	Mature lymphocytic neoplasm	0.00299	0.0431			ADAM19,ADAM9,AIM2,ATM,CCR7,CD200,CD27,CD69,CD7,CD80,CFL1,CLK1,CNDP1,CTSH,CTTN,EGR1,ENPP1,FASN,FERMT2,FLNA,GNG4,GTPBP2,H2AX,HIC1,IFI44,IFI44L,IFIT2,IL2,IL2RA,ITGAE,ITGAV,MCL1,MIF,PLCG2,RANBP6,SEPTIN9,SLAMF7,SMAD5,TNFRSF8,TP53,TRAPPC9,TRERF1,ZNF331	43
Organ Morphology,Reproductive System Development and Function,Tissue Morphology	Quantity of testicular cells	0.003	0.0431			ATM,TP53,TSC22D3	3
Cellular Development,Cellular Growth and Proliferation,Embryonic Development	Arrest in proliferation of embryonic cell lines	0.003	0.0431			EGR1,SAT1,TP53	3
Cell Death and Survival	Apoptosis of fibroblast-like synoviocytes	0.003	0.0431			GAS5,TNFRSF10B,TP53	3
Cancer,Organismal Injury and Abnormalities,Reproductive System Disease	Genital tract cancer	0.00323	0.0454			ACOT7,ACTG1,ADAM19,ADAM9,AKNA,ALG10B,APOD,ATM,BAG6,BSG,BTAF1,C5orf24,CAPN12,CAPN2,CCR7,CD69,CD80,CDK2AP2,CEP152,CHIC1,CLEC2D,CLK1,CREB5,CTSD,CTSH,DDIT3,DGKH,DOCK5,DPP9,EEF2,EGR1,ENPP1,ENPP2,EPN1,EZH1,F2R,FAM153A/FAM153B,FASN,FBXO22,FERMT2,FLNA,FNDC3A,FZD4,GBP3,GNA15,GPR63,GRB10,GTPBP2,H2AX,HEG1,HERC5,HIC1,HSD17B7,HSPA8,IFI44,IFI44L,IFIT2,IFRD1,IGF2BP3,IL2,IL2RA,ITGAV,KIF18B,KIF1A,KLF8,L3MBTL4,LMO…	135
Cancer,Organismal Injury and Abnormalities	Growth of secondary tumor	0.00337	0.0468			ADAM9,IL2,TP53	3
Cellular Development,Cellular Growth and Proliferation,Hematological System Development and Function,Lymphoid Tissue Structure and Development	Expansion of CD8+ T lymphocyte	0.00337	0.0468			HSPA8,IL2,IL23A	3
Cancer,Organismal Injury and Abnormalities	Malignant neoplasm of aerodigestive tract	0.00343	0.0468			ADAM19,ADAM22,ADAM9,ADARB1,AIM2,ATM,BSG,BTAF1,C7orf50,CCR7,CD7,CFHR4,CTSH,CTTN,DNHD1,ENPP2,FASN,FNDC3A,FZD4,GAS5,GNA15,GPR63,HEG1,HOXB9,IFIT2,IGIP,IL2RA,ITGAV,KIF1A,LSP1,LUC7L3,MCL1,MIF,ORMDL1,OTOF,PLAG1,PNN,PRRC2A,RASGRP3,RNPC3,SAT1,SLC7A11,TANC2,TLE3,TP53,TP53INP1,TRAPPC9,TRERF1,TRPC4AP,UBN2,ZBTB20,ZDHHC21,ZFC3H1,ZNF107,ZNF345,ZNF721	56
Cancer,Organismal Injury and Abnormalities,Tissue Morphology,Tumor Morphology	Morphology of malignant tumor	0.00344	0.0468			IL2,LSP1,MIF,TP53	4
Cell Cycle	Arrest in M phase	0.00344	0.0468			ATM,CAPN2,SEPTIN9,TP53	4
Cell Cycle,Embryonic Development	Cell cycle progression of embryonic cell lines	0.00344	0.0468			MXD1,PNN,TP53,TP53INP1	4
Cancer,Organismal Injury and Abnormalities	Cancer of head	0.00347	0.0471			ADAM9,AKNA,BSG,C7orf50,CD7,CLTB,CTSH,ENPP2,FASN,FNDC3A,GNA15,HEG1,HOXB9,IFIT2,IGIP,IL2RA,LSP1,LUC7L3,MCL1,MIF,ORMDL1,OTOF,PLAG1,PRRC2A,PVT1,RASGRP3,RNPC3,SAT1,SLC7A11,TLE3,TP53,TP53INP1,TRERF1,UBN2,ZBTB20,ZDHHC21,ZFC3H1	37
