# Supplementary material for: Mesenchymal Stromal Cell-Derived Small Extracellular Vesicles Modulate Apoptosis, TNF Alpha and Interferon Gamma Response Gene mRNA Expression in T Lymphocytes
Source: Int J Mol Sci. 2023 Sep 5;24(18):13689. doi: 10.3390/ijms241813689 (PMC10530670; doi:10.3390/ijms241813689)
Supplement: Supplementary file 1 [file ijms-24-13689-s001.zip › Table S5. cell_to_cell_signaling_and_interactions_NETWORK_genes.xls]

## Sheet: Sheet0
© 2000-2021 QIAGEN. All rights reserved.
Symbol	Synonym(s)	Entrez Gene Name	Ensembl	Expr Intensity/RPKM/FPKM/Counts	Expr Log Ratio	Expr p-value	Expr False Discovery Rate (q-value)	Location	Family	Entrez Gene ID for Human	Entrez Gene ID for Mouse	Entrez Gene ID for Rat
ADAM9	a disintegrin and metallopeptidase domain 9 (meltrin gamma), a disintegrin and metallopeptidase domain 9 (meltrin γ), ADAM metallopeptidase domain 9, ADAM9 precursor, AU020942, CORD9, MCMP, MDC9, meltrin gamma, meltrin γ, mKIAA0021, Mlt, Mltng	ADAM metallopeptidase domain 9	ENSG00000168615	571.682	-0.508186	0.00136729	0.0931534	Plasma Membrane	peptidase	8754	11502	290834
ATM	AI256621, AT1, ATA, ataxia telangiectasia mutated, ATC, ATD, ATDC, ATE, ATM serine/threonine kinase, C030026E19RIK, TEL1, TELO1	ATM serine/threonine kinase	ENSG00000149311	2504.92	-0.408346	0.00143823	0.0952692	Nucleus	kinase	472	11920	300711
BAG6	2410045D21Rik, AA408914, BAG cochaperone 6, BAT3, Bat, BCL2-associated athanogene 6, D17H6S52, D17H6S52E, D6S52E, G3, Scyth, Scythe	BAG cochaperone 6	ENSG00000204463	2857.74	0.424876	0.000582913	0.0578559	Nucleus	enzyme	7917	224727	94342
CFL1	AA959946, CFL, co, Cof, COF1EMD, cofilin, COFILIN 1, cofilin 1, non-muscle, HEL-S-15, n-c	cofilin 1	ENSG00000172757	6497.04	0.61476	1.42966e-06	0.0011808	Nucleus	other	1072	12631	29271
CTSH	ACC-4, ACC-5, AL022844, CATHEPSIN H, CPSB, Pro-cathepsin H	cathepsin H	ENSG00000103811	912.373	0.752043	1.15293e-05	0.00512741	Cytoplasm	peptidase	1512	13036	25425
CTTN	1110020L01Rik, amplaxin, Cortactin, Cttnb, EMS1, Ems	cortactin	ENSG00000085733	281.042	-0.681966	0.000210271	0.0302543	Plasma Membrane	other	2017	13043	60465
DDIT3	AC144852.1, AltDDIT3, C/EBP homology, C/EBP-homologous, C/EBPzeta, Cebp Zeta, Cebp ζ, CEBPZ, ch, CHOP-10, CHOP-, DNA DAMAGE-INDUCIBLE transcript, DNA-damage inducible transcript 3, gadd15, GADD153, RM4	DNA damage inducible transcript 3	ENSG00000175197	217.133	-0.9206	1.5109e-05	0.00592223	Nucleus	transcription regulator	1649	13198	29467
F2R	AI482343, Cf2, CF2R, coagulation factor II (thrombin) receptor, coagulation factor II thrombin receptor, HTR, P, PAR-1, Th, ThrR, TR, TRGPC, α Thrombin Receptor	coagulation factor II thrombin receptor	ENSG00000181104	237.671	-0.845526	1.25307e-05	0.00536638	Plasma Membrane	G-protein coupled receptor	2149	14062	25439
FLNA	ABP-2, ABP-280, ABPX, CSBS, CVD1, Di, DILP2, F730004A14Rik, FGS2, fila, Filamin a, filamin, alpha, filamin, α, filamin-1, Fl, FLN1, FLN, Flna predicted, FMD, GENA 379, LOC100131857, MNS, NEWGENE 1560614, NHBP, OPD1, OPD2, OPD, RGD1560614, XLVD, XMVD	filamin A	ENSG00000196924	31456.4	0.47753	7.47926e-05	0.016165	Cytoplasm	other	2316	192176	293860
FURIN	9130404I01RIK, BASIC-AMINO-ACID-SPECIFIC FURIN, Fu, FUR, furin (paired basic amino acid cleaving enzyme), FURIN FROM PACE, furin, paired basic amino acid cleaving enzyme, PA, PACE, Pcs, PCSK3, SP, SPC1	furin, paired basic amino acid cleaving enzyme	ENSG00000140564	18597.9	0.5599	0.000193935	0.0293133	Cytoplasm	peptidase	5045	18550	54281
IL2	IL, interleukin 2, lymphokine, TCGF	interleukin 2	ENSG00000109471	69.7145	-1.36707	3.1744e-05	0.00953392	Extracellular Space	cytokine	3558	16183	116562
IL2RA	CD25, I, IDDM10, Il 2 receptor α subunit, IL-2 Rα, IL2R, IL2RAC, IMD41, interleukin 2 receptor subunit alpha, interleukin 2 receptor subunit α, interleukin 2 receptor α, Interleukin 2 receptor α chain, interleukin 2 receptor, alpha chain, interleukin 2 receptor, α chain, Ly-4, Ly-43, p55, TAC, TAC ANTIGEN, TCGFR	interleukin 2 receptor subunit alpha	ENSG00000134460	18505.8	0.403575	0.00110251	0.0838708	Plasma Membrane	transmembrane receptor	3559	16184	25704
ITGAV	1110004F14RIK, 2610028E01Rik, alpha V, CD51, D430040G12RIK, integrin alpha V, integrin subunit alpha V, integrin subunit α V, Integrin α V, MSK8, VNRA, VTNR, α V	integrin subunit alpha V	ENSG00000138448	745.073	-0.493711	0.00101072	0.0794378	Plasma Membrane	transmembrane receptor	3685	16410	296456
LSP1	Calcium-binding Protein pp52, Ls, lymphocyte specific 1, lymphocyte-specific protein 1, p5, p50, pp, pp52, WP3, WP34	lymphocyte specific protein 1	ENSG00000130592	4171.07	0.501664	4.98609e-05	0.0125337	Cytoplasm	other	4046	16985	361680
MIF	DER6, GIF, Gl, GLIF, MACROPHAGE INHIBITOR FACTOR, Macrophage migration inhibitory factor, macrophage migration inhibitory factor (glycosylation-inhibiting factor), Mif1, MMIF	macrophage migration inhibitory factor	ENSG00000240972	95.5972	1.18767	4.49136e-05	0.0121817	Extracellular Space	cytokine	4282	17319	81683
PLCG2	1-phosphatidylinositol-4,5-bisphosphate phosphodiesterase gamma 2, 1-phosphatidylinositol-4,5-bisphosphate phosphodiesterase γ 2, APLAID, FCAS3, phospholipase C gamma 2, phospholipase C, gamma 2, phospholipase C, γ 2, phospholipase C-γ-2, PLC-gamma-2, PLC-IV, PLC-γ-2, Plcg, PLCga, RP11-960L18.1	phospholipase C gamma 2	ENSG00000197943	447.086	-0.601349	0.00120797	0.088349	Cytoplasm	enzyme	5336	234779	29337
PPP1R9B	NEB2, Neurabin2, PPP1R6, PPP1R9, protein phosphatase 1 regulatory subunit 9B, protein phosphatase 1, regulatory subunit 9B, s, SPINO, Spinophilin, SPL, Spn	protein phosphatase 1 regulatory subunit 9B	ENSG00000108819	2418.03	0.546877	2.72769e-05	0.00888459	Cytoplasm	enzyme	84687	217124	84686
PRDX2	AL022839, Band-8, HEL-S-2a, NKEF-B, P, Peroxiredoxin 2, PRP, PRX2, PRX II, PTX1, T, TDPX1, Tdpx, TDX1, Thioredoxin dependent peroxide reductase, Torin, TP, TPX1, TPx, TPx-B, TR, TSA	peroxiredoxin 2	ENSG00000167815	1868.43	0.409598	0.00126039	0.0899935	Cytoplasm	enzyme	7001	21672	29338
PRKAB2	5730553K21Rik, AMPK beta2, AW049591, BB124140, protein kinase AMP-activated non-catalytic subunit beta 2, protein kinase AMP-activated non-catalytic subunit β 2, protein kinase, AMP-activated, beta 2 non-catalytic subunit, protein kinase, AMP-activated, β 2 non-catalytic subunit	protein kinase AMP-activated non-catalytic subunit beta 2	ENSG00000131791	420.405	-0.822517	9.77305e-05	0.0191535	Cytoplasm	kinase	5565	108097	64562
SLC7A11	9930009M05RIK, AI451155, CCBR1, CYSTEINE GLUATAMINE TRANSPORTER, solute carrier family 7 (cationic amino acid transporter, y+ system), member 11, solute carrier family 7 member 11, su, sut, xCT	solute carrier family 7 member 11	ENSG00000151012	303.496	-0.764944	0.000120568	0.0224859	Plasma Membrane	transporter	23657	26570	310392
TNFRSF10B	CD262, Death receptor 5, DR5, KI, Kille, KILLER, KILLER/DR5, Ly9, Ly98, MK, TNF receptor superfamily member 10b, TR, TRA, TRAIL receptor 4, TRAIL receptor-2, TRAIL-R2, TRIC, TRICK2, TRICK, TRICK2A, TRICK2B, TRICKB, ZTNFR9	TNF receptor superfamily member 10b	ENSG00000120889	1309.13	-0.532198	0.000252895	0.0331094	Plasma Membrane	transmembrane receptor	8795
TNFRSF8	CD30, D1S166E, Ki, Ki-1, TNF receptor superfamily member 8, tumor necrosis factor receptor superfamily, member 8, tumour necrosis factor receptor superfamily, member 8	TNF receptor superfamily member 8	ENSG00000120949	641.863	0.790606	0.000187032	0.0284559	Plasma Membrane	transmembrane receptor	943	21941	25069
TP53	bbl, BCC7, bfy, bhy, BMFS5, LFS1, p4, p5, p44, P53, P53 cellular tumour antigen, p53 tumor suppressor, transformation related protein 53, TRP53, tumor protein p53, tumour protein p53	tumor protein p53	ENSG00000141510	1080.94	0.442921	0.00124206	0.0892045	Nucleus	transcription regulator	7157	22059	24842
